# Supplementary material for: Copper-mediated divergent synthesis of halogenated 1-pyrrolines, 3-azabicyclo[3.1.0]hex-2-enes and α,α-dibromo imines from N-allyl enamines
Source: Royal Society of Chemistry journal article supplement (doi:10.1039/d5qo00217f), 2025-01-01

## *Supporting Information*

### **Copper-Mediated Divergent Synthesis of Halogenated 1-Pyrrolines, 3-Azabicyclo[3.1.0]hex-2-enes and $\alpha$ , $\alpha$ -Dibromo imines from N-Allyl Enamine**

Xiyan Duan,<sup>a\*</sup> Junqi Wang,<sup>a</sup> Kun Liu,<sup>a</sup> Fengjiao Du,<sup>a</sup> Maolin He,<sup>a</sup> Wenxin Li,<sup>a</sup> Xinming Liu<sup>a</sup>,  
Pu Liu<sup>a\*</sup>

<sup>a</sup> School of Chemistry & Chemical Engineering, Henan University of Science and Technology,  
Luoyang 471003, Henan, China;

Fax: +86(379)64231914; +086-0379-64231914;

E-mail: [duanxiyan@tju.edu.cn](mailto:duanxiyan@tju.edu.cn);

## Contents

|                                                                                           |    |
|-------------------------------------------------------------------------------------------|----|
| General Information .....                                                                 | 2  |
| Experimental Procedure .....                                                              | 2  |
| General Procedure A for the Synthesis of benzoylacetate <b>S1-S3</b> .....                | 2  |
| General Procedure B for the Synthesis of N-allyl enamine <b>1a-1s</b> .....               | 4  |
| General Procedure C for the synthesis of dibromo 1-pyrrolines <b>2a-2m</b> .....          | 8  |
| General Procedure D for the Synthesis of dibromo imines <b>3a-3h</b> .....                | 14 |
| General Procedure E for the Synthesis of 3-azabicyclo[3.1.0]hex-2-enes <b>4a-4r</b> ..... | 18 |
| Control experiment .....                                                                  | 26 |
| Application .....                                                                         | 28 |
| X-Ray crystallographic studies .....                                                      | 29 |
| References .....                                                                          | 33 |
| NMR Spectra .....                                                                         | 34 |
| 2D NMR spectra .....                                                                      | 85 |

## General Information

All reagents and solvent were commercial available with analytical grade and used as received. Yields refer to chromatographically and spectroscopically ( $^1\text{H}$  NMR) homogeneous materials, unless otherwise stated. The used solvents were purified and dried according to common procedures. High-resolution mass spectra (HRMS) were obtained with a FTICR-MS (Ionspec 7.0T) spectrometer. The  $^1\text{H}$  and  $^{13}\text{C}$  NMR spectra were recorded in  $\text{CDCl}_3$  or  $\text{DMSO-d}_6$  solution on a Bruker AV 400 MHz spectrometer. Chemical shifts are reported in parts per million ( $\delta$ ) relative to  $\text{CDCl}_3$  (7.26 ppm) for  $^1\text{H}$  NMR data and  $\text{CDCl}_3$  (77.0 ppm) for  $^{13}\text{C}$  NMR data or the peak of  $\text{DMSO-d}_6$ , defined at  $\delta = 2.50$  ( $^1\text{H}$  NMR) or  $\delta = 39.5$  ( $^{13}\text{C}$  NMR). The following abbreviations were used to explain multiplicities: s = singlet, d = doublet, t = triplet, q = quartet, m = multiplet, br = broad). Flash column chromatography was performed over silica gel 200–300 mesh, and the eluent was a mixture of ethyl acetate (EA) and petroleum ether (PE).

## Experimental Procedure

### General Procedure A for the Synthesis of benzoylacetate **S1-S3**

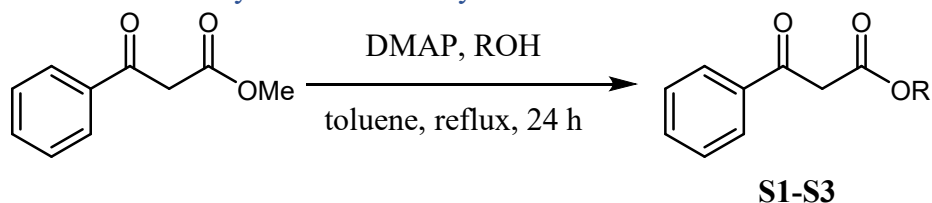

Scheme 1

Methyl benzoylacetate (3.56 g, 20 mmol, 1.0 equiv) was dissolved in toluene (10 mL). DMAP (244 mg, 2 mmol, 0.1 equiv) and alcohol (30 mmol, 1.5 equiv) were then added to the solution. The reaction mixture was heated to reflux and stirred for 16 hours. After completion, the mixture was concentrated under reduced pressure and purified by flash chromatography (PE: EA = 100:1) on silica gel to afford products **S1–S3**.

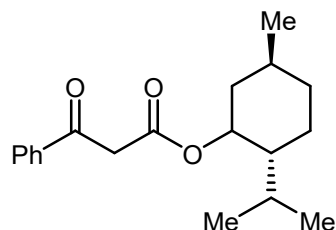

(*2R,5S*)-2-isopropyl-5-methylcyclohexyl 3-oxo-3-phenylpropanoate (**S1**). The general procedure A was followed and purification by flash column chromatography afforded **S1** as a yellow oil (PE: EA = 100:1). Yield: 4.8 g, 79%;  $^1\text{H}$  NMR (400 MHz,  $\text{CDCl}_3$ ):  $\delta$  = 8.03–7.87 (m, 2H), 7.62–7.55 (m, 1H), 7.49–7.41 (m, 2H), 4.72 (td,  $J$  = 10.9, 4.4 Hz, 1H), 3.96 (q,  $J$  = 15.4 Hz, 2H), 2.05–1.97 (m, 1H), 1.77–1.59 (m, 4H), 1.54–1.38 (m, 2H), 1.36–1.23 (m, 2H), 0.88 (d,  $J$  = 6.5 Hz, 3H), 0.80 (d,  $J$  = 7.0 Hz, 3H), 0.68 (d,  $J$  = 6.9 Hz, 3H).  $^{13}\text{C}$  NMR (100 MHz,  $\text{CDCl}_3$ ):  $\delta$  = 192.5, 167.1, 136.1, 133.6, 131.1, 128.7, 128.4, 126.0, 75.6, 46.8, 46.5, 40.5, 34.1, 31.3, 25.9, 23.1, 21.9, 20.7, 16.0. HRMS (ESI):  $m/z$   $[\text{M} + \text{Na}]^+$  calcd for  $\text{C}_{19}\text{H}_{26}\text{NaO}_3$ : 325.1780; found: 325.1782.

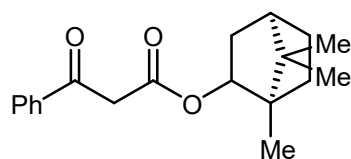

(*1R,4R*)-1,7,7-trimethylbicyclo[2.2.1]heptan-2-yl 3-oxo-3-phenylpropanoate (**S2**). The general procedure A was followed and purification by flash column chromatography afforded **S2** as a yellow oil (PE: EA = 100:1). Yield: 4.4 g, 74%;  $^1\text{H}$  NMR (400 MHz,  $\text{CDCl}_3$ ):  $\delta$  = 7.99–7.89 (m, 2H), 7.60–7.54 (m, 1H), 7.47–7.40 (m, 2H), 4.68 (dd,  $J$  = 7.7, 3.6 Hz, 1H), 3.94 (d,  $J$  = 3.2 Hz, 2H), 1.81–1.65 (m, 4H), 1.5–1.45 (m, 1H), 1.14–1.03 (m, 2H), 0.77 (s, 3H), 0.76 (s, 3H), 0.72 (s, 3H).  $^{13}\text{C}$  NMR (100 MHz,  $\text{CDCl}_3$ ):  $\delta$  = 192.3, 166.9, 136.1, 133.6, 131.1, 128.7, 128.5, 125.9, 82.3, 48.6, 46.8, 46.1, 44.9, 38.5, 33.6, 26.9, 19.9, 19.5, 11.2. HRMS (ESI):  $m/z$   $[\text{M} + \text{Na}]^+$  calcd for  $\text{C}_{19}\text{H}_{24}\text{NaO}_3$ : 323.1623; found: 323.1627.

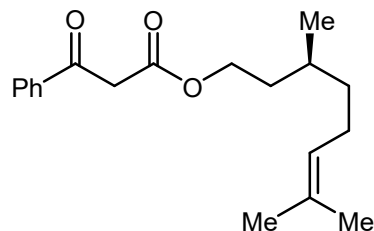

(*S*)-3,7-dimethyloct-6-en-1-yl 3-oxo-3-phenylpropanoate (**S3**). The general procedure A was followed and purification by flash column chromatography afforded **S3** as a yellow oil (PE: EA = 100:1). Yield: 5.1 g, 85%;  $^1\text{H}$  NMR (400 MHz,  $\text{CDCl}_3$ ):  $\delta$  = 8.03–7.84 (m, 2H), 7.65–7.55 (m, 1H), 7.52–7.39 (m, 2H), 5.17–4.98 (m, 1H), 4.25–4.14 (m, 2H), 3.98 (s, 2H), 2.07–1.86 (m, 2H), 1.70–1.65 (m, 4H), 1.59 (s, 3H), 1.52–1.34 (m, 2H), 1.36–1.23 (m, 1H), 1.20–1.08 (m, 1H), 0.86 (d,  $J$  = 6.4 Hz, 3H).  $^{13}\text{C}$  NMR (100 MHz,  $\text{CDCl}_3$ ):  $\delta$  = 192.4, 167.5, 136.0, 133.7, 131.3, 128.7, 128.5, 126.0, 124.5, 87.4, 64.0, 46.0, 36.9, 35.2, 29.3, 25.7, 25.3, 19.2, 17.6. HRMS (ESI):  $m/z$  [ $\text{M} + \text{Na}$ ] $^+$  calcd for  $\text{C}_{19}\text{H}_{26}\text{NaO}_3$ : 325.1780; found: 325.1784.

#### General Procedure B for the Synthesis of N-allyl enamine **1a-1s**

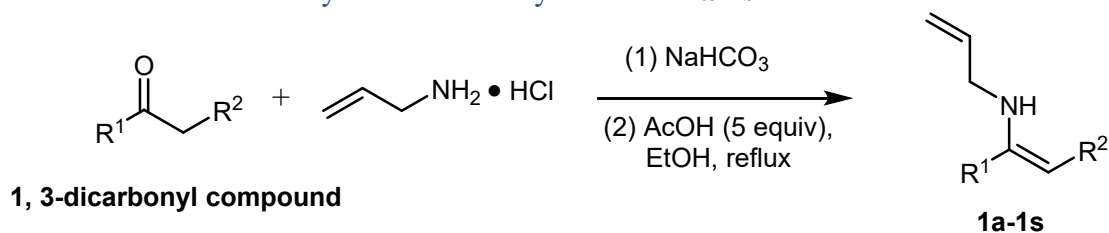

Scheme 2

Allylamine hydrochloride (50.0 mmol) and NaHCO<sub>3</sub> (50.0 mmol) were stirred at room temperature for 30 minutes. 1, 3-dicarbonyl compound (10.0 mmol), acetic acid (50.0 mmol), 4Å molecular sieves (1 g), and ethanol (20 mL) were then successively added. The reaction mixture was heated to reflux for 6 hours. After cooling, the mixture was filtered through a short pad of celite and concentrated under reduced pressure. The residue was dissolved in CH<sub>2</sub>Cl<sub>2</sub>, and the organic layer was washed with 1 M HCl solution and water, dried over Na<sub>2</sub>SO<sub>4</sub>, and concentrated. The crude product was purified by flash chromatography to afford N-allyl enamines **1a-1s**. For the NMR data of compounds **1a-1j**, **1q**, and **1o**, please refer to our previous publication.<sup>1</sup>



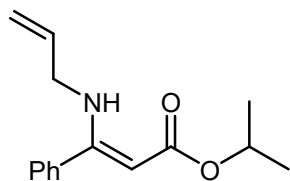

*isopropyl (Z)-3-(allylamino)-3-phenylacrylate (1l)*.<sup>3</sup> Isopropyl 3-oxo-3-phenylpropanoate was used as a reaction substrate. The general procedure B was followed and purification by flash column chromatography afforded **1l** as a colorless oil (PE: EA = 100:1). Yield: 1.8 g, 75%; <sup>1</sup>H NMR (400 MHz, CDCl<sub>3</sub>):  $\delta$  = 8.62 (s, 1H), 7.41–7.31 (m, 5H), 5.90–5.66 (m, 1H), 5.25–5.16 (m, 1H), 5.13–5.08 (m, 1H), 5.07–5.00 (m, 1H), 4.61 (s, 1H), 3.76–3.60 (m, 2H), 1.26 (d,  $J$  = 6.3 Hz, 6H). <sup>13</sup>C NMR (100 MHz, CDCl<sub>3</sub>):  $\delta$  = 170.0, 164.6, 136.0, 135.4, 129.2, 128.3, 127.8, 115.8, 86.4, 65.6, 46.8, 22.2.

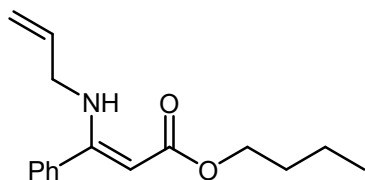

*butyl (Z)-3-(allylamino)-3-phenylacrylate (1m)*. Butyl 3-oxo-3-phenylpropanoate was used as a reaction substrate. The general procedure B was followed and purification by flash column chromatography afforded **1m** as a colorless oil (PE: EA = 100:1). Yield: 1.7 g, 67%; <sup>1</sup>H NMR (400 MHz, CDCl<sub>3</sub>):  $\delta$  = 8.61 (s, 1H), 7.41–7.32 (m, 5H), 5.86–5.68 (m, 1H), 5.27–5.17 (m, 1H), 5.15–5.06 (m, 1H), 4.64 (s, 1H), 4.10 (t,  $J$  = 6.7 Hz, 2H), 3.71–3.63 (m, 2H), 1.66–1.61 (m, 2H), 1.47–1.36 (m, 2H), 0.94 (t,  $J$  = 7.4 Hz, 3H). <sup>13</sup>C NMR (100 MHz, CDCl<sub>3</sub>):  $\delta$  = 170.5, 164.7, 136.0, 135.4, 129.2, 128.3, 127.8, 115.8, 85.9, 62.7, 46.8, 31.1, 19.2, 13.8. HRMS (ESI):  $m/z$  [M + Na]<sup>+</sup> calcd for C<sub>16</sub>H<sub>21</sub>NNaO<sub>2</sub>: 282.1470; found: 282.1474.

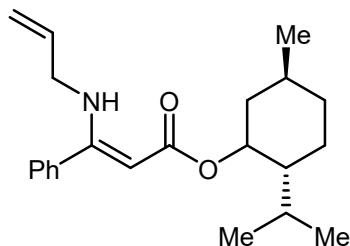

*(2R,5S)-2-isopropyl-5-methylcyclohexyl (Z)-3-(allylamino)-3-phenylacrylate (1n)*. **S1** was used as a reaction substrate. The general procedure B was followed and purification by flash column

chromatography afforded **1n** as a colorless oil (PE:EA = 100:1). Yield: 2.3 g, 68%;  $^1\text{H}$  NMR (400 MHz,  $\text{CDCl}_3$ ):  $\delta$  = 8.61 (s, 1H), 7.45–7.30 (m, 5H), 5.94–5.71 (m, 1H), 5.27–5.15 (m, 1H), 5.14–5.05 (m, 1H), 4.70 (td,  $J$  = 10.8, 4.3 Hz, 1H), 4.62 (s, 1H), 3.74–3.63 (m, 2H), 2.15–2.04 (m, 1H), 2.01–1.89 (m, 1H), 1.71–1.63 (m, 2H), 1.60–1.46 (m, 1H), 1.45–1.31 (m, 1H), 1.15–0.95 (m, 2H), 0.95–0.84 (m, 7H), 0.80 (d,  $J$  = 6.9 Hz, 3H).  $^{13}\text{C}$  NMR (100 MHz,  $\text{CDCl}_3$ ):  $\delta$  = 170.1, 164.5, 136.0, 135.4, 129.2, 128.2, 127.8, 115.8, 86.4, 72.2, 47.2, 46.9, 41.5, 34.4, 31.5, 26.2, 23.7, 22.1, 20.8, 16.6. HRMS (ESI):  $m/z$   $[\text{M} + \text{Na}]^+$  calcd for  $\text{C}_{22}\text{H}_{31}\text{NNaO}_2$ : 364.2252; found: 364.2256.

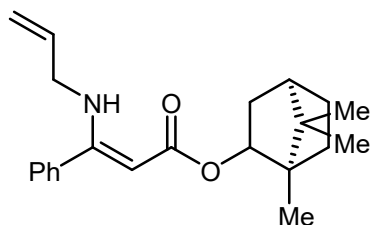

(1*R*,4*R*)-1,7,7-trimethylbicyclo[2.2.1]heptan-2-yl (Z)-3-(allylamino)-3-phenylacrylate (**1o**). **S2** was used as a reaction substrate. The general procedure B was followed and purification by flash column chromatography afforded **1o** as a colorless solid (PE: EA = 100:1). Yield: 2.0 g, 59%; mp 49–50 °C.  $^1\text{H}$  NMR (400 MHz,  $\text{CDCl}_3$ ):  $\delta$  = 8.59 (s, 1H), 7.44–7.31 (m, 5H), 5.88–5.69 (m, 1H), 5.28–5.15 (m, 1H), 5.14–5.05 (m, 1H), 4.73–4.66 (m, 1H), 4.61 (s, 1H), 3.73–3.59 (m, 2H), 1.87 – 1.77 (m, 2H), 1.74–1.65 (m, 2H), 1.59–1.50 (m, 1H), 1.23–1.04 (m, 2H), 0.98 (s, 3H), 0.87 (s, 3H), 0.83 (s, 3H).  $^{13}\text{C}$  NMR (100 MHz,  $\text{CDCl}_3$ ):  $\delta$  = 170.1, 164.4, 136.0, 135.4, 129.1, 128.2, 127.8, 115.7, 86.5, 79.2, 48.6, 46.9, 46.8, 45.1, 39.1, 33.9, 27.1, 20.2, 19.9, 11.5. HRMS (ESI):  $m/z$   $[\text{M} + \text{Na}]^+$  calcd for  $\text{C}_{22}\text{H}_{29}\text{NNaO}_2$ : 362.2096; found: 362.2097.

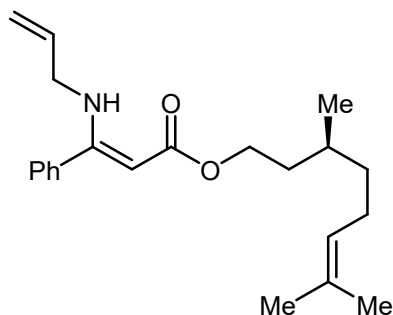

(*S*)-3,7-dimethyloct-6-en-1-yl (Z)-3-(allylamino)-3-phenylacrylate (**1p**). **S3** was used as a reaction substrate. The general procedure B was followed and purification by flash column chromatography afforded **1p** as a colorless oil (PE: EA = 100:1). Yield: 2.5 g, 72%;  $^1\text{H}$  NMR (400 MHz,  $\text{CDCl}_3$ ):

$\delta$  = 8.61 (s, 1H), 7.41–7.32 (m, 5H), 5.94–5.66 (m, 1H), 5.28–5.17 (m, 1H), 5.15–5.04 (m, 2H), 4.64 (s, 1H), 4.23–4.04 (m, 2H), 3.67 (tt,  $J$  = 6.6, 1.7 Hz, 2H), 2.08–1.92 (m, 2H), 1.73–1.66 (m, 4H), 1.62–1.54 (m, 4H), 1.52–1.43 (m, 1H), 1.41–1.32 (m, 1H), 1.24–1.13 (m, 1H), 0.93 (d,  $J$  = 6.6 Hz, 3H).  $^{13}\text{C}$  NMR (100 MHz,  $\text{CDCl}_3$ ):  $\delta$  = 170.4, 164.7, 135.9, 135.3, 131.1, 129.2, 128.3, 127.7, 124.7, 115.7, 85.9, 61.3, 46.8, 37.0, 35.8, 29.6, 25.7, 25.4, 19.4, 17.6. HRMS (ESI):  $m/z$  [ $\text{M} + \text{Na}$ ] $^+$  calcd for  $\text{C}_{22}\text{H}_{31}\text{NNaO}_2$ : 364.2252; found: 364.2256.

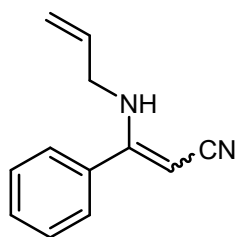

*3*-(allylamino)-*3*-phenylacrylonitrile (**1r**).<sup>2</sup> 3-oxo-3-phenylpropanenitrile was used as a reaction substrate. The general procedure B was followed and purification by flash column chromatography afforded **1r** as a red oil (PE: EA = 5:1). Yield: 1.5 g, 80%. Isolated as a *E/Z* mixture (*E*: *Z* = 0.23:1);  $^1\text{H}$  NMR (400 MHz,  $\text{CDCl}_3$ ):  $\delta$  = 7.58–7.52 (m, 2H), 7.46–7.38 (m, 3H), 5.96–5.76 (m, 1H), 5.34–5.24 (m, 2H), 4.56 (s, 1H), 4.06 (s, 1H), 3.80–3.66 (m, 2H).  $^{13}\text{C}$  NMR (100 MHz,  $\text{CDCl}_3$ ):  $\delta$  = 162.0, 135.7, 132.1, 130.4, 128.8, 127.7, 121.4, 118.0, 62.1, 46.3.

#### General Procedure C for the synthesis of dibromo 1-pyrrolines **2a–2m**

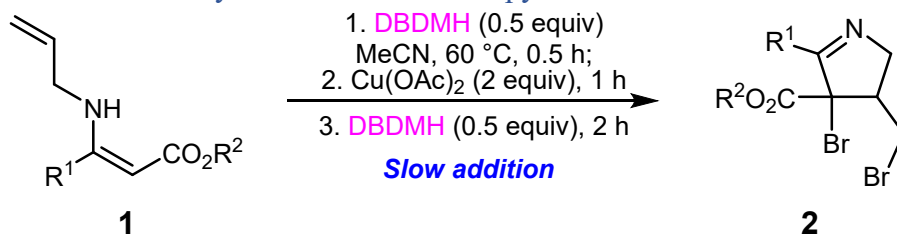

Scheme 4

To a solution of *N*-allyl enamine **1** (1 mmol) in MeCN (1.5 mL), DBDMH (0.5 mmol) was added. The mixture was stirred at 60 °C for 30 minutes, after which  $\text{Cu}(\text{OAc})_2$  (2 mmol) was added. After 1 hour, an additional portion of DBDMH (0.5 mmol) was added in 5 batches over 2 hours. Upon completion (monitored by TLC), the reaction mixture was cooled to room temperature, and  $\text{CH}_2\text{Cl}_2$  (50 mL) was added. The organic layer was washed with brine (15 mL  $\times$

2), dried over Na<sub>2</sub>SO<sub>4</sub>, filtered, and concentrated under reduced pressure to afford a residue. The residue was purified by flash column chromatography to yield dibromo 1-pyrrolines **2**.

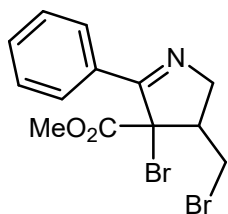

*methyl 4-bromo-3-(bromomethyl)-5-phenyl-3,4-dihydro-2H-pyrrole-4-carboxylate (2a)*. The general procedure C was followed and purification by flash column chromatography afforded **2a** as a colorless oil (PE: EA = 10:1). Yield: 242 mg, 65%; <sup>1</sup>H NMR (400 MHz, CDCl<sub>3</sub>):  $\delta$  = 7.88–7.85 (m, 1H), 7.48–7.36 (m, 4H), 4.33 (dd,  $J$  = 16.4, 6.7 Hz, 1H), 3.75 (s, 3H), 3.72–3.56 (m, 3H), 3.30–3.16 (m, 1H). <sup>13</sup>C NMR (100 MHz, CDCl<sub>3</sub>):  $\delta$  = 169.9, 168.5, 131.2, 131.1, 128.6, 127.8, 70.5, 62.9, 54.3, 53.8, 30.1. HRMS (ESI):  $m/z$  [M + H]<sup>+</sup> calcd for C<sub>13</sub>H<sub>14</sub>Br<sub>2</sub>NO<sub>2</sub>: 373.9391; found: 373.9394.

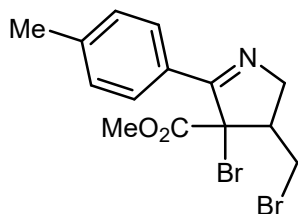

*methyl 4-bromo-3-(bromomethyl)-5-(p-tolyl)-3,4-dihydro-2H-pyrrole-4-carboxylate (2b)*. The general procedure C was followed and purification by flash column chromatography afforded **2b** as a white solid (PE: EA = 10:1). Yield: 236 mg, 61%; mp: 106–107 °C. <sup>1</sup>H NMR (400 MHz, CDCl<sub>3</sub>):  $\delta$  = 7.80–7.69 (m, 2H), 7.22–7.14 (m, 2H), 4.40–4.23 (m, 1H), 3.76 (s, 3H), 3.73–3.54 (m, 3H), 3.29–3.17 (m, 1H), 2.37 (s, 3H). <sup>13</sup>C NMR (100 MHz, CDCl<sub>3</sub>):  $\delta$  = 169.8, 168.6, 141.5, 129.3, 128.3, 127.7, 70.6, 62.8, 54.3, 53.8, 30.2, 21.4. HRMS (ESI):  $m/z$  [M + H]<sup>+</sup> calcd for C<sub>14</sub>H<sub>16</sub>Br<sub>2</sub>NO<sub>2</sub>: 387.9548; found: 387.9548.

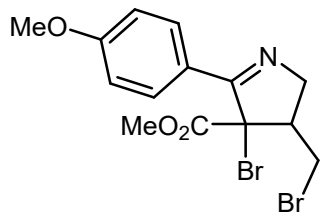

*methyl 4-bromo-3-(bromomethyl)-5-(4-methoxyphenyl)-3,4-dihydro-2H-pyrrole-4-carboxylate (2c)*. The general procedure C was followed and purification by flash column chromatography afforded **2c** as a white solid (PE: EA = 8:1). Yield: 254 mg, 63%; mp 103-104 °C. <sup>1</sup>H NMR (400 MHz, CDCl<sub>3</sub>): δ = 7.86–7.75 (m, 2H), 6.93–6.84 (m, 2H), 4.28 (dd, *J* = 16.3, 6.7 Hz, 1H), 3.82 (s, 3H), 3.75 (s, 3H), 3.72–3.51 (m, 3H), 3.28–3.16 (m, 1H). <sup>13</sup>C NMR (100 MHz, CDCl<sub>3</sub>): δ = 169.2, 168.6, 161.8, 129.4, 123.6, 113.9, 70.6, 62.7, 55.3, 54.3, 53.8, 30.2. HRMS (ESI): *m/z* [M + H]<sup>+</sup> calcd for C<sub>14</sub>H<sub>16</sub>Br<sub>2</sub>NO<sub>3</sub>: 403.9497; found: 403.9501.

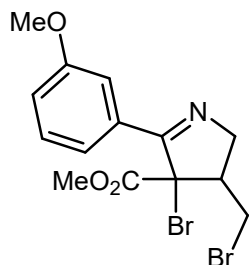

*methyl 4-bromo-3-(bromomethyl)-5-(3-methoxyphenyl)-3,4-dihydro-2H-pyrrole-4-carboxylate (2d)*. The general procedure C was followed and purification by flash column chromatography afforded **2d** as a white solid (PE: EA = 10:1). Yield: 222 mg, 55%; mp 85-86 °C. <sup>1</sup>H NMR (400 MHz, CDCl<sub>3</sub>): δ = 7.51–7.48 (m, 1H), 7.44–7.38 (m, 1H), 7.33–7.27 (m, 1H), 7.05–6.98 (m, 1H), 4.34 (dd, *J* = 16.4, 6.7 Hz, 1H), 3.83 (s, 3H), 3.77 (s, 3H), 3.70–3.57 (m, 3H), 3.32–3.19 (m, 1H). <sup>13</sup>C NMR (100 MHz, CDCl<sub>3</sub>): δ = 170.4, 168.2, 159.7, 131.7, 129.6, 120.4, 118.5, 112.5, 70.4, 62.2, 55.4, 54.4, 53.6, 29.8. HRMS (ESI): *m/z* [M + H]<sup>+</sup> calcd for C<sub>14</sub>H<sub>16</sub>Br<sub>2</sub>NO<sub>3</sub>: 403.9497; found: 403.9494.

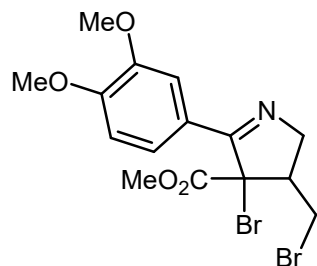

*Methyl 4-bromo-3-(bromomethyl)-5-(3,4-dimethoxyphenyl)-3,4-dihydro-2H-pyrrole-4-carboxylate (2e).* The general procedure C was followed and purification by flash column chromatography afforded **2e** as a colorless oil (PE: EA = 5:1). Yield: 165 mg, 38%;  $^1\text{H}$  NMR (400 MHz,  $\text{CDCl}_3$ ):  $\delta$  = 7.51–7.48 (m, 1H), 7.40–7.32 (m, 1H), 6.85–6.80 (m, 1H), 4.28 (dd,  $J$  = 16.3, 6.7 Hz, 1H), 3.89 (s, 6H), 3.76 (s, 3H), 3.69–3.52 (m, 3H), 3.30–3.19 (m, 1H).  $^{13}\text{C}$  NMR (100 MHz,  $\text{CDCl}_3$ ):  $\delta$  = 169.4, 168.7, 151.5, 149.0, 123.7, 121.0, 110.4, 110.3, 70.7, 62.6, 55.9, 55.8, 54.3, 53.9, 30.1. HRMS (ESI):  $m/z$   $[\text{M} + \text{H}]^+$  calcd for  $\text{C}_{15}\text{H}_{18}\text{Br}_2\text{NO}_4$ : 433.9603; found: 433.9604.

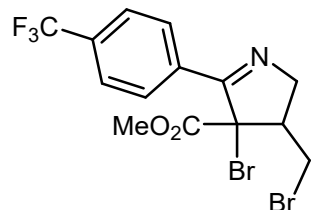

*methyl 4-bromo-3-(bromomethyl)-5-(4-(trifluoromethyl)phenyl)-3,4-dihydro-2H-pyrrole-4-carboxylate (2f).* The general procedure C was followed and purification by flash column chromatography afforded **2f** as a white solid (PE: EA = 10:1). Yield: 300 mg, 68%; mp 109–110 °C.  $^1\text{H}$  NMR (400 MHz,  $\text{CDCl}_3$ ):  $\delta$  = 7.99 (d,  $J$  = 8.2 Hz, 2H), 7.66 (d,  $J$  = 8.3 Hz, 2H), 4.38 (dd,  $J$  = 16.7, 6.7 Hz, 1H), 3.77 (s, 3H), 3.73–3.59 (m, 3H), 3.30–3.19 (m, 1H).  $^{13}\text{C}$  NMR (100 MHz,  $\text{CDCl}_3$ ):  $\delta$  = 168.9, 168.2, 134.5, 132.6 (q,  $J$  = 32 Hz), 128.2, 125.5 (q,  $J$  = 4 Hz), 123.7 (d,  $J$  = 271 Hz), 70.1, 63.1, 54.5, 53.8, 29.9. HRMS (ESI):  $m/z$   $[\text{M} + \text{H}]^+$  calcd for  $\text{C}_{14}\text{H}_{13}\text{Br}_2\text{F}_3\text{NO}_2$ : 441.9265; found: 441.9269.

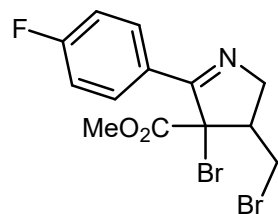

*methyl 4-bromo-3-(bromomethyl)-5-(4-fluorophenyl)-3,4-dihydro-2H-pyrrole-4-carboxylate (2g).*

The general procedure C was followed and purification by flash column chromatography afforded **2g** as a colorless oil (PE: EA = 10:1). Yield: 260 mg, 67%; <sup>1</sup>H NMR (400 MHz, CDCl<sub>3</sub>): δ = 7.94–7.80 (m, 2H), 7.14–6.99 (m, 2H), 4.30 (dd, *J* = 16.4, 6.7 Hz, 1H), 3.75 (s, 3H), 3.70–3.51 (m, 3H), 3.28–3.17 (m, 1H). <sup>13</sup>C NMR (100 MHz, CDCl<sub>3</sub>): δ = 168.7, 168.3, 165.6 (d, *J* = 250 Hz), 130.0 (d, *J* = 8 Hz), 127.4 (d, *J* = 4 Hz), 115.7 (d, *J* = 22 Hz), 70.4, 62.8, 54.4, 53.8, 30.0. HRMS (ESI): *m/z* [M + H]<sup>+</sup> calcd for C<sub>13</sub>H<sub>13</sub>Br<sub>2</sub>FNO<sub>2</sub>: 391.9297; found: 391.9301.

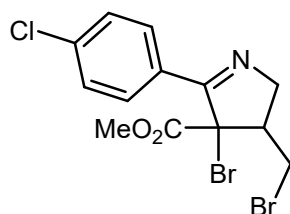

*methyl 4-bromo-3-(bromomethyl)-5-(4-chlorophenyl)-3,4-dihydro-2H-pyrrole-4-carboxylate (2h).* The general procedure C was followed and purification by flash column chromatography afforded **2h** as a white solid (PE: EA = 10:1). Yield: 210 mg, 52%; mp: 108–109 °C. <sup>1</sup>H NMR (400 MHz, CDCl<sub>3</sub>): δ = 7.83–7.75 (m, 2H), 7.39–7.33 (m, 2H), 4.32 (dd, *J* = 16.6, 6.7 Hz, 1H), 3.76 (s, 3H), 3.72–3.54 (m, 3H), 3.27–3.17 (m, 1H). <sup>13</sup>C NMR (100 MHz, CDCl<sub>3</sub>): δ = 168.9, 168.3, 137.3, 129.6, 129.1, 128.8, 70.2, 62.9, 54.4, 53.8, 30.0. HRMS (ESI): *m/z* [M + H]<sup>+</sup> calcd for C<sub>13</sub>H<sub>13</sub>Br<sub>2</sub>ClNO<sub>2</sub>: 407.9002; found: 407.8999.

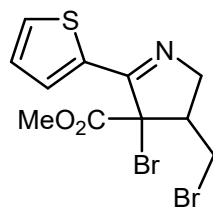

*methyl 4-bromo-3-(bromomethyl)-5-(thiophen-2-yl)-3,4-dihydro-2H-pyrrole-4-carboxylate (2j).*

The general procedure C was followed and purification by flash column chromatography afforded **2j** as a colorless oil (PE: EA = 10:1). Yield: 121 mg, 32%; <sup>1</sup>H NMR (400 MHz, CDCl<sub>3</sub>): δ = 7.51–7.36 (m, 2H), 7.08–7.02 (m, 1H), 4.29 (dd, *J* = 16.4, 6.8 Hz, 1H), 3.82 (s, 3H), 3.71–3.50 (m, 3H), 3.38–3.28 (m, 1H). <sup>13</sup>C NMR (100 MHz, CDCl<sub>3</sub>): δ = 168.1, 164.7, 135.2, 130.2, 129.1, 127.8, 70.5, 62.8, 54.5, 53.7, 30.1. HRMS (ESI): *m/z* [M + H]<sup>+</sup> calcd for C<sub>11</sub>H<sub>12</sub>Br<sub>2</sub>NO<sub>2</sub>S: 379.8956; found: 379.8958.

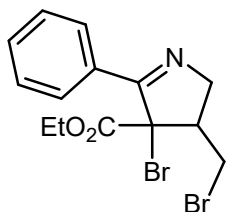

*ethyl 4-bromo-3-(bromomethyl)-5-phenyl-3,4-dihydro-2H-pyrrole-4-carboxylate (2k).* The general procedure C was followed and purification by flash column chromatography afforded **2k** as a white solid (PE: EA = 10:1). Yield: 252 mg, 65%; mp: 65–66 °C.  $^1\text{H}$  NMR (400 MHz,  $\text{CDCl}_3$ ):  $\delta$  = 7.93–7.83 (m, 2H), 7.47–7.34 (m, 3H), 4.33 (dd,  $J$  = 16.4, 6.7 Hz, 1H), 4.21 (q,  $J$  = 7.2 Hz, 2H), 3.77–3.55 (m, 3H), 3.30–3.15 (m, 1H), 1.11 (t,  $J$  = 7.1 Hz, 3H).  $^{13}\text{C}$  NMR (100 MHz,  $\text{CDCl}_3$ ):  $\delta$  = 170.2, 167.7, 131.3, 131.0, 128.4, 127.8, 70.9, 63.7, 62.9, 53.7, 30.2, 13.7. HRMS (ESI):  $m/z$   $[\text{M} + \text{H}]^+$  calcd for  $\text{C}_{14}\text{H}_{16}\text{Br}_2\text{NO}_2$ : 387.9548; found: 387.9549.

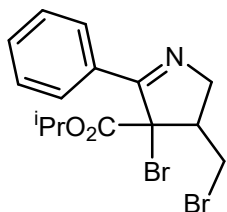

*isopropyl 4-bromo-3-(bromomethyl)-5-phenyl-3,4-dihydro-2H-pyrrole-4-carboxylate (2l).* The general procedure C was followed and purification by flash column chromatography afforded **2l** as a colorless oil (PE: EA = 10:1). Yield: 261 mg, 65%;  $^1\text{H}$  NMR (400 MHz,  $\text{CDCl}_3$ ):  $\delta$  = 7.93–7.81 (m, 2H), 7.49–7.34 (m, 3H), 5.18–4.85 (m, 1H), 4.30 (dd,  $J$  = 16.3, 6.7 Hz, 1H), 3.75–3.51 (m, 3H), 3.38–3.11 (m, 1H), 1.22 (d,  $J$  = 6.3 Hz, 3H), 0.95 (d,  $J$  = 6.3 Hz, 3H).  $^{13}\text{C}$  NMR (100 MHz,  $\text{CDCl}_3$ ):  $\delta$  = 170.4, 167.0, 131.4, 131.0, 128.4, 127.9, 71.7, 71.3, 62.9, 53.7, 30.1, 21.4, 20.9. HRMS (ESI):  $m/z$   $[\text{M} + \text{H}]^+$  calcd for  $\text{C}_{15}\text{H}_{18}\text{Br}_2\text{NO}_2$ : 401.9704; found: 401.9707.

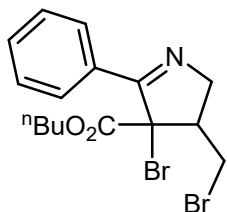

*butyl 4-bromo-3-(bromomethyl)-5-phenyl-3,4-dihydro-2H-pyrrole-4-carboxylate (2m)*. The general procedure C was followed and purification by flash column chromatography afforded **2m** as a colorless oil (PE: EA = 10:1). Yield: 203 mg, 49%;  $^1\text{H}$  NMR (400 MHz,  $\text{CDCl}_3$ ):  $\delta$  = 7.97–7.79 (m, 2H), 7.46–7.34 (m, 3H), 4.33 (dd,  $J$  = 16.4, 6.7 Hz, 1H), 4.22–4.07 (m, 2H), 3.75–3.56 (m, 3H), 3.28–3.14 (m, 1H), 1.55–1.39 (m, 2H), 1.21–1.06 (m, 2H), 0.78 (t,  $J$  = 7.4 Hz, 3H).  $^{13}\text{C}$  NMR (100 MHz,  $\text{CDCl}_3$ ):  $\delta$  = 170.2, 167.8, 131.3, 131.0, 128.5, 127.8, 70.9, 67.5, 62.9, 53.7, 30.1, 30.1, 18.8, 13.4. HRMS (ESI):  $m/z$   $[\text{M} + \text{H}]^+$  calcd for  $\text{C}_{16}\text{H}_{20}\text{Br}_2\text{NO}_2$ : 415.9861; found: 415.9864.

#### General Procedure D for the Synthesis of dibromo imines **3a-3h**

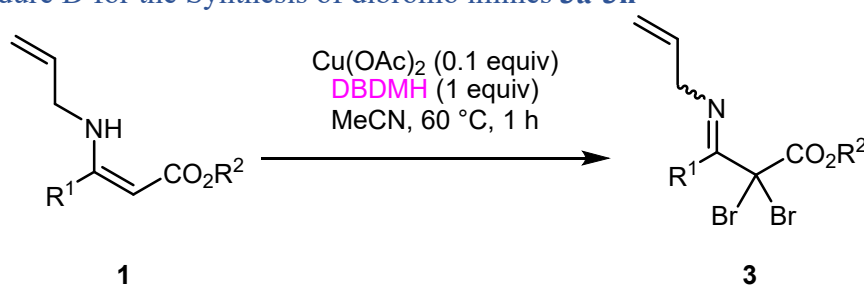

Scheme 5

To a solution of N-allyl enamine **1** (1 mmol) in MeCN (1.5 mL) was added DBDMH (1 mmol) and  $\text{Cu}(\text{OAc})_2$  (0.1 mmol). The reaction mixture was heated to 60 °C and stirred for 1 h. After TLC confirmed reaction completion, the mixture was cooled to room temperature, and  $\text{CH}_2\text{Cl}_2$  (50 mL) was added. The reaction mixture was washed with brine (15 mL $\times$ 2). The organic layer was dried over  $\text{Na}_2\text{SO}_4$ , filtered and concentrated under reduced pressure to afford a residue. This residue was purified via flash column chromatography to yield dibromo imines **3**.

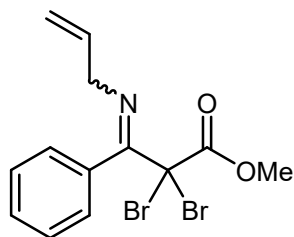

*methyl 3-(allylimino)-2,2-dibromo-3-phenylpropanoate (3a)*. The general procedure D was followed and purification by flash column chromatography afforded **3a** as a yellow oil (PE: EA = 70:1). Yield: 354 mg, 95%. Isolated as a *E/Z* mixture (*E*: *Z* = 1:8);  $^1\text{H}$  NMR (400 MHz,  $\text{CDCl}_3$ ):  $\delta$  = 7.49–7.44 (m, 3H), 7.42–7.37 (m, 2H), 5.99–5.81 (m, 1H), 5.15–5.06 (m, 2H), 3.92 (s, 3H),

3.87–3.83 (m, 2H).  $^{13}\text{C}$  NMR (100 MHz,  $\text{CDCl}_3$ ):  $\delta$  = 166.5, 165.4, 134.5, 131.8, 129.5, 129.0, 128.1, 115.6, 61.4, 55.8, 54.7. HRMS (ESI):  $m/z$   $[\text{M} + \text{Na}]^+$  calcd for  $\text{C}_{13}\text{H}_{13}\text{Br}_2\text{NO}_2\text{Na}$ : 395.9211; found: 395.9206.

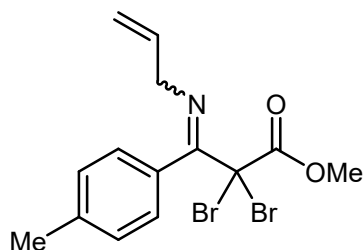

*methyl 3-(allylimino)-2,2-dibromo-3-(p-tolyl)propanoate (3b)*. The general procedure D was followed and purification by flash column chromatography afforded **3b** as a yellow oil (PE: EA = 80:1). Yield: 329 mg, 85%. Isolated as a *E/Z* mixture (*E*: *Z* = 1:13);  $^1\text{H}$  NMR (400 MHz,  $\text{CDCl}_3$ ):  $\delta$  = 7.30–7.24 (m, 4H), 6.02–5.76 (m, 1H), 5.19–5.04 (m, 2H), 3.91 (s, 3H), 3.88–3.83 (m, 2H), 2.42 (s, 3H).  $^{13}\text{C}$  NMR (100 MHz,  $\text{CDCl}_3$ ):  $\delta$  = 166.7, 165.5, 139.5, 134.6, 128.9, 128.8, 128.8, 115.5, 61.7, 55.8, 54.6, 21.3. HRMS (ESI):  $m/z$   $[\text{M} + \text{H}]^+$  calcd for  $\text{C}_{14}\text{H}_{16}\text{Br}_2\text{NO}_2$ : 387.9548; found: 387.9550.

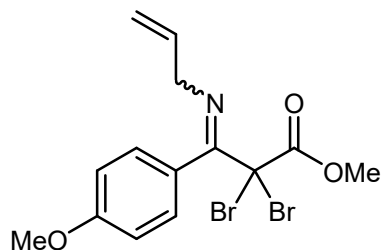

*methyl 3-(allylimino)-2,2-dibromo-3-(4-methoxyphenyl)propanoate (3c)*. The general procedure D was followed and purification by flash column chromatography afforded **3c** as a yellow oil (PE: EA = 80:1). Yield: 318 mg, 79%. Isolated as a *E/Z* mixture (*E*: *Z* = 1:17);  $^1\text{H}$  NMR (400 MHz,  $\text{CDCl}_3$ ):  $\delta$  = 7.36–7.28 (m, 2H), 6.97–6.92 (m, 2H), 5.97–5.77 (m, 1H), 5.14–5.02 (m, 2H), 3.88 (s, 3H), 3.86–3.83 (m, 5H).  $^{13}\text{C}$  NMR (100 MHz,  $\text{CDCl}_3$ ):  $\delta$  = 166.5, 165.5, 160.3, 134.6, 130.5, 123.9, 115.5, 113.5, 62.1, 55.9, 55.2, 54.6. HRMS (ESI):  $m/z$   $[\text{M} + \text{H}]^+$  calcd for  $\text{C}_{14}\text{H}_{16}\text{Br}_2\text{NO}_3$ : 403.9497; found: 403.9502.

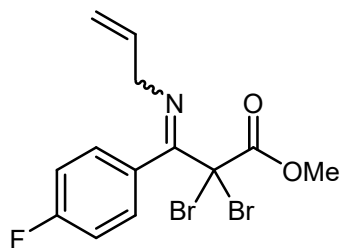

*methyl 3-(allylimino)-2,2-dibromo-3-(4-fluorophenyl)propanoate (3d)*. The general procedure D was followed and purification by flash column chromatography afforded **3d** as a yellow oil (PE:EA = 80:1). Yield: 348 mg, 89%. Isolated as a *E/Z* mixture (*E*: *Z* = 1:3);  $^1\text{H}$  NMR (400 MHz,  $\text{CDCl}_3$ ):  $\delta$  = 7.46–7.34 (m, 2H), 7.18–7.10 (m, 2H), 5.98–5.55 (m, 1H), 5.18–5.02 (m, 2H), 3.96–3.87 (m, 3H), 3.84–3.77 (m, 2H).  $^{13}\text{C}$  NMR (100 MHz,  $\text{CDCl}_3$ ):  $\delta$  = 165.7, 165.3, 163.2 (d,  $J$  = 249 Hz), 134.3, 131.1 (d,  $J$  = 8 Hz), 127.7 (d,  $J$  = 4 Hz), 115.7, 115.4 (d,  $J$  = 21 Hz), 61.4, 55.9, 54.7. HRMS (ESI):  $m/z$   $[\text{M} + \text{H}]^+$  calcd for  $\text{C}_{13}\text{H}_{13}\text{Br}_2\text{FNO}_2$ : 391.9297; found: 391.9300.

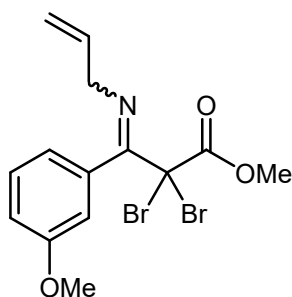

*methyl 3-(allylimino)-2,2-dibromo-3-(3-methoxyphenyl)propanoate (3e)*. The general procedure D was followed and purification by flash column chromatography afforded **3e** as a yellow oil (PE:EA = 80:1). Yield: 367 mg, 91%. Isolated as a *E/Z* mixture (*E*: *Z* = 1:13);  $^1\text{H}$  NMR (400 MHz,  $\text{CDCl}_3$ ):  $\delta$  = 7.38–7.32 (m, 1H), 7.00–6.89 (m, 3H), 5.97–5.80 (m, 1H), 5.15–5.03 (m, 2H), 3.90 (s, 3H), 3.86–3.83 (m, 2H), 3.82 (s, 3H).  $^{13}\text{C}$  NMR (100 MHz,  $\text{CDCl}_3$ ):  $\delta$  = 166.2, 165.4, 159.1, 134.6, 133.0, 129.2, 121.3, 115.5, 114.9, 114.8, 61.2, 55.9, 55.3, 54.7. HRMS (ESI):  $m/z$   $[\text{M} + \text{H}]^+$  calcd for  $\text{C}_{14}\text{H}_{16}\text{Br}_2\text{NO}_3$ : 403.9497; found: 403.9497.

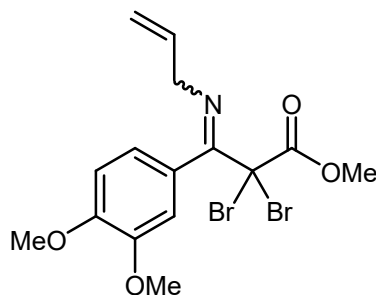

*methyl 3-(allylimino)-2,2-dibromo-3-(3,4-dimethoxyphenyl)propanoate (3f)*. The general procedure D was followed and purification by flash column chromatography afforded **3f** as a yellow oil (PE: EA = 80:1). Yield: 372 mg, 86%. Isolated as a *E/Z* mixture (*E*: *Z* = 1:4); <sup>1</sup>H NMR (400 MHz, CDCl<sub>3</sub>): δ = 6.95–6.86 (m, 3H), 6.03–5.77 (m, 1H), 5.18–4.92 (m, 2H), 3.91 (s, 3H), 3.89 (s, 3H), 3.88–3.85 (m, 4H), 3.80–3.72 (m, 1H). <sup>13</sup>C NMR (100 MHz, CDCl<sub>3</sub>): δ = 166.3, 165.5, 149.8, 148.4, 134.7, 124.0, 121.8, 115.4, 112.3, 110.5, 61.9, 56.0, 56.0, 55.8, 54.6. HRMS (ESI): *m/z* [M + H]<sup>+</sup> calcd for C<sub>15</sub>H<sub>18</sub>Br<sub>2</sub>NO<sub>4</sub>: 433.9603; found: 433.9607.

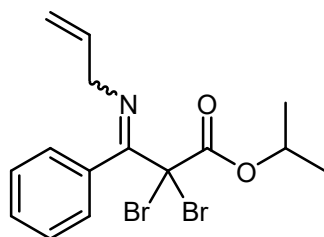

*isopropyl 3-(allylimino)-2,2-dibromo-3-phenylpropanoate (3g)*. The general procedure D was followed and purification by flash column chromatography afforded **3g** as a yellow oil (PE: EA = 80:1). Yield: 361 mg, 90%. Isolated as a *E/Z* mixture (*E*: *Z* = 1:6); <sup>1</sup>H NMR (400 MHz, CDCl<sub>3</sub>): δ = 7.47–7.41 (m, 3H), 7.41–7.33 (m, 2H), 5.99–5.79 (m, 1H), 5.19–5.01 (m, 3H), 3.91–3.77 (m, 2H), 1.31 (s, 3H), 1.30 (s, 3H). <sup>13</sup>C NMR (100 MHz, CDCl<sub>3</sub>): δ = 166.4, 164.2, 134.5, 132.1, 129.4, 129.0, 128.0, 115.8, 72.6, 62.4, 56.1, 21.3. HRMS (ESI): *m/z* [M + H]<sup>+</sup> calcd for C<sub>15</sub>H<sub>18</sub>Br<sub>2</sub>NO<sub>2</sub>: 401.9704; found: 401.9708.

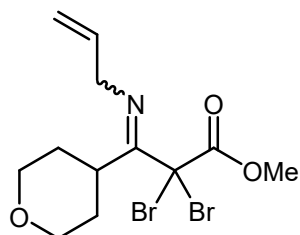

*methyl 3-(allylimino)-2,2-dibromo-3-(tetrahydro-2H-pyran-4-yl)propanoate (3h)*. The general procedure D was followed and purification by flash column chromatography afforded **3h** as a white solid (PE: EA = 10:1). Yield: 286 mg, 75%. Isolated as a *E/Z* mixture (*E*: *Z* = 1:5); mp: 62–63 °C. <sup>1</sup>H NMR (400 MHz, CDCl<sub>3</sub>): δ = 6.05–5.79 (m, 1H), 5.17–4.96 (m, 2H), 4.42–4.35 (m, 2H), 4.06–4.01 (m, 2H), 3.83 (s, 3H), 3.51–3.43 (m, 2H), 3.40–3.31 (m, 1H), 2.28–2.13 (m, 2H),

1.89–1.83 (m, 2H).  $^{13}\text{C}$  NMR (100 MHz,  $\text{CDCl}_3$ ):  $\delta$  = 165.8, 165.2, 134.5, 115.4, 68.0, 65.0, 54.5, 53.0, 39.7, 30.1. HRMS (ESI):  $m/z$   $[\text{M} + \text{H}]^+$  calcd for  $\text{C}_{12}\text{H}_{18}\text{Br}_2\text{NO}_3$ : 381.9653; found: 381.9656.

#### General Procedure E for the Synthesis of 3-azabicyclo[3.1.0]hex-2-enes **4a-4r**

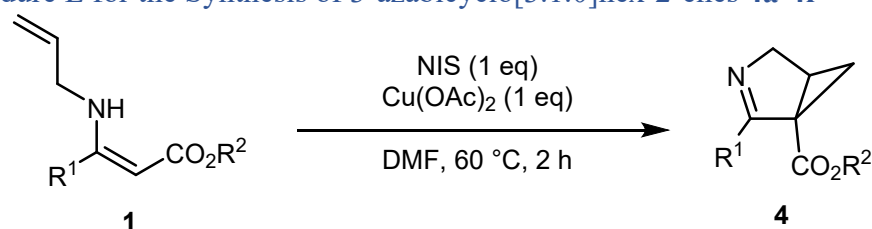

Scheme 6

To a solution of N-allyl enamine **1** (1 mmol) in DMF (1.5 mL) was added NIS (1 mmol) and  $\text{Cu}(\text{OAc})_2$  (1 mmol). The reaction mixture was stirred at 60 °C for 2 h. After TLC confirmed reaction completion, the reaction mixture was cooled to room temperature, and EtOAc (50 mL) was introduced. The reaction mixture was washed with brine (15 mL $\times$ 2). The organic layer was dried over  $\text{Na}_2\text{SO}_4$ , filtered and concentrated under reduced pressure to afford a residue. This residue was purified via flash column chromatography to yield 3-azabicyclo[3.1.0]hex-2-enes **4**.

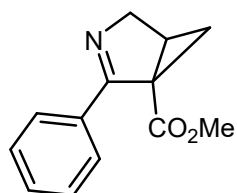

*methyl 2-phenyl-3-azabicyclo[3.1.0]hex-2-ene-1-carboxylate* (**4a**). The general procedure E was followed and purification by flash column chromatography afforded **4a** as a yellow oil (PE: EA = 5:1). Yield: 194 mg, 90%;  $^1\text{H}$  NMR (400 MHz,  $\text{CDCl}_3$ ):  $\delta$  = 7.82–7.64 (m, 2H), 7.46–7.37 (m, 3H), 4.24–3.98 (m, 2H), 3.60 (s, 3H), 2.62–2.50 (m, 1H), 2.13 (dd,  $J$  = 8.5, 4.2 Hz, 1H), 0.95–0.85 (m, 1H).  $^{13}\text{C}$  NMR (100 MHz,  $\text{CDCl}_3$ ):  $\delta$  = 172.6, 170.3, 133.6, 130.4, 128.2, 128.0, 61.7, 52.0, 40.7, 31.8, 21.5. HRMS (ESI):  $m/z$   $[\text{M} + \text{H}]^+$  calcd for  $\text{C}_{13}\text{H}_{14}\text{NO}_2$ : 216.1025; found: 216.1027.

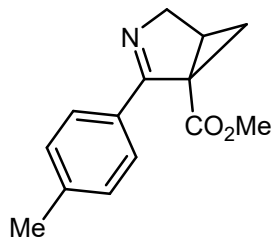

*methyl 2-(p-tolyl)-3-azabicyclo[3.1.0]hex-2-ene-1-carboxylate (4b)*. The general procedure E was followed and purification by flash column chromatography afforded **4b** as a yellow oil (PE: EA = 5:1). Yield: 188 mg, 82%;  $^1\text{H}$  NMR (400 MHz,  $\text{CDCl}_3$ ):  $\delta$  = 7.75–7.51 (m, 2H), 7.24–7.16 (m, 2H), 4.26–3.95 (m, 2H), 3.61 (s, 3H), 2.58–2.50 (m, 1H), 2.39 (s, 3H), 2.17–2.07 (m, 1H), 0.95–0.73 (m, 1H).  $^{13}\text{C}$  NMR (100 MHz,  $\text{CDCl}_3$ ):  $\delta$  = 172.5, 170.4, 140.7, 130.8, 129.0, 128.1, 61.6, 52.1, 40.7, 31.8, 21.5, 21.4. HRMS (ESI):  $m/z$   $[\text{M} + \text{H}]^+$  calcd for  $\text{C}_{14}\text{H}_{16}\text{NO}_2$ : 230.1181; found: 230.1186.

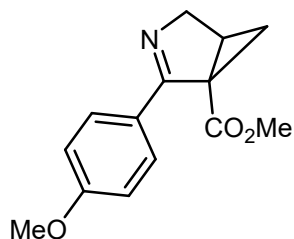

*methyl 2-(4-methoxyphenyl)-3-azabicyclo[3.1.0]hex-2-ene-1-carboxylate (4c)*.<sup>4</sup> The general procedure E was followed and purification by flash column chromatography afforded **4c** as a yellow oil (PE: EA = 5:1). Yield: 196 mg, 80%;  $^1\text{H}$  NMR (400 MHz,  $\text{CDCl}_3$ ):  $\delta$  = 7.80–7.58 (m, 2H), 6.95–6.85 (m, 2H), 4.21–3.96 (m, 2H), 3.83 (s, 3H), 3.61 (s, 3H), 2.57–2.47 (m, 1H), 2.10 (dd,  $J$  = 8.5, 4.2 Hz, 1H), 0.88–0.82 (m, 1H).  $^{13}\text{C}$  NMR (100 MHz,  $\text{CDCl}_3$ ):  $\delta$  = 171.8, 170.4, 161.4, 129.8, 126.3, 113.6, 61.4, 55.3, 52.1, 40.5, 31.9, 21.5.

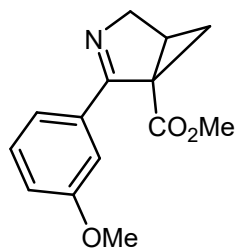

*methyl 2-(3-methoxyphenyl)-3-azabicyclo[3.1.0]hex-2-ene-1-carboxylate (4d)*. The general procedure E was followed and purification by flash column chromatography afforded **4d** as a

yellow oil (PE: EA = 5:1). Yield: 206 mg, 84%;  $^1\text{H}$  NMR (400 MHz,  $\text{CDCl}_3$ ):  $\delta$  = 7.35–7.31 (m, 1H), 7.31–7.26 (m, 2H), 7.03–6.92 (m, 1H), 4.27–3.95 (m, 2H), 3.83 (s, 3H), 3.61 (s, 3H), 2.64–2.43 (m, 1H), 2.11 (dd,  $J$  = 8.5, 4.2 Hz, 1H), 0.91–0.83 (m, 1H).  $^{13}\text{C}$  NMR (100 MHz,  $\text{CDCl}_3$ ):  $\delta$  = 172.5, 170.3, 159.5, 135.0, 129.2, 120.9, 116.9, 112.3, 61.8, 55.3, 52.1, 40.8, 31.9, 21.4. HRMS (ESI):  $m/z$   $[\text{M} + \text{H}]^+$  calcd for  $\text{C}_{14}\text{H}_{16}\text{NO}_3$ : 246.1130; found: 246.1134.

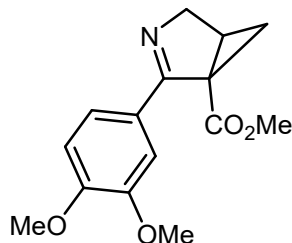

*methyl 2-(3,4-dimethoxyphenyl)-3-azabicyclo[3.1.0]hex-2-ene-1-carboxylate (4e)*. The general procedure E was followed and purification by flash column chromatography afforded **4e** as a yellow oil (PE: EA = 3:1). Yield: 187 mg, 68%;  $^1\text{H}$  NMR (400 MHz,  $\text{CDCl}_3$ ):  $\delta$  = 7.39 (d,  $J$  = 1.9 Hz, 1H), 7.20 (dd,  $J$  = 8.3, 1.9 Hz, 1H), 6.84 (d,  $J$  = 8.3 Hz, 1H), 4.17–3.96 (m, 2H), 3.90 (s, 6H), 3.61 (s, 3H), 2.61–2.40 (m, 1H), 2.09 (dd,  $J$  = 8.5, 4.2 Hz, 1H), 0.89–0.77 (m, 1H).  $^{13}\text{C}$  NMR (100 MHz,  $\text{CDCl}_3$ ):  $\delta$  = 171.8, 170.5, 151.0, 148.8, 126.5, 122.0, 110.1, 110.0, 61.5, 55.8, 55.8, 52.1, 40.5, 32.0, 21.3. HRMS (ESI):  $m/z$   $[\text{M} + \text{H}]^+$  calcd for  $\text{C}_{15}\text{H}_{18}\text{NO}_4$ : 276.1236; found: 276.1241.

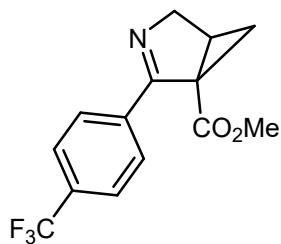

*methyl 2-(4-(trifluoromethyl)phenyl)-3-azabicyclo[3.1.0]hex-2-ene-1-carboxylate (4f)*. The general procedure E was followed and purification by flash column chromatography afforded **4f** as a yellow solid (PE: EA = 5:1). Yield: 156 mg, 55%; mp: 57–58 °C.  $^1\text{H}$  NMR (400 MHz,  $\text{CDCl}_3$ ):  $\delta$  = 7.84 (d,  $J$  = 8.1 Hz, 2H), 7.66 (d,  $J$  = 8.2 Hz, 2H), 4.25–4.02 (m, 2H), 3.61 (s, 3H), 2.66–2.55 (m, 1H), 2.15 (dd,  $J$  = 8.6, 4.2 Hz, 1H), 0.95–0.85 (m, 1H).  $^{13}\text{C}$  NMR (100 MHz,  $\text{CDCl}_3$ ):  $\delta$  = 171.5, 170.0, 137.1, 131.9 (q,  $J$  = 32 Hz), 128.4, 125.2 (q,  $J$  = 4 Hz), 123.9 (d,  $J$  = 270 Hz), 62.0,

52.1, 40.7, 32.1, 21.9. HRMS (ESI):  $m/z$   $[M + H]^+$  calcd for  $C_{14}H_{13}F_3NO_2$ : 284.0898; found: 284.0902.

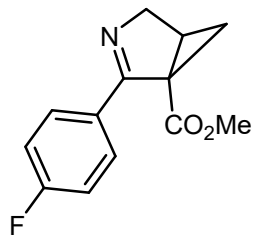

*methyl 2-(4-fluorophenyl)-3-azabicyclo[3.1.0]hex-2-ene-1-carboxylate (4g).*<sup>3</sup> The general procedure E was followed and purification by flash column chromatography afforded **4g** as a yellow solid (PE: EA = 5:1). Yield: 214 mg, 92%; mp: 65–66 °C.  $^1H$  NMR (400 MHz,  $CDCl_3$ ):  $\delta$  = 7.83–7.66 (m, 2H), 7.12–7.03 (m, 2H), 4.20–3.95 (m, 2H), 3.61 (s, 3H), 2.64–2.50 (m, 1H), 2.12 (dd,  $J$  = 8.5, 4.1 Hz, 1H), 0.91–0.81 (m, 1H).  $^{13}C$  NMR (100 MHz,  $CDCl_3$ ):  $\delta$  = 171.3, 170.2, 164.0 (d,  $J$  = 248 Hz), 130.1 (d,  $J$  = 9 Hz), 130.0 (d,  $J$  = 4 Hz), 115.3 (d,  $J$  = 22 Hz), 61.6, 52.1, 40.6, 32.1, 21.7.

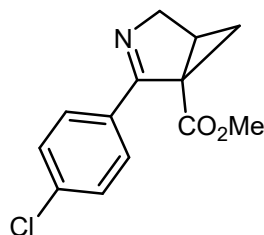

*methyl 2-(4-chlorophenyl)-3-azabicyclo[3.1.0]hex-2-ene-1-carboxylate (4h).* The general procedure E was followed and purification by flash column chromatography afforded **4h** as a yellow oil (PE: EA = 5:1). Yield: 149 mg, 60%;  $^1H$  NMR (400 MHz,  $CDCl_3$ ):  $\delta$  = 7.69 (d,  $J$  = 8.5 Hz, 2H), 7.39 (d,  $J$  = 8.5 Hz, 2H), 4.23–4.01 (m, 2H), 3.63 (s, 3H), 2.65–2.54 (m, 1H), 2.15 (dd,  $J$  = 8.5, 4.2 Hz, 1H), 0.95–0.85 (m, 1H).  $^{13}C$  NMR (100 MHz,  $CDCl_3$ ):  $\delta$  = 171.5, 170.1, 136.4, 132.2, 129.4, 128.5, 61.7, 52.1, 40.6, 32.1, 21.7. HRMS (ESI):  $m/z$   $[M + H]^+$  calcd for  $C_{13}H_{13}ClNO_2$ : 250.0635; found: 250.0639.

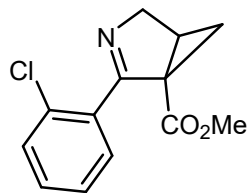

*methyl 2-(2-chlorophenyl)-3-azabicyclo[3.1.0]hex-2-ene-1-carboxylate (4i).* The general procedure E was followed and purification by flash column chromatography afforded **4i** as a yellow oil (PE: EA = 5:1). Yield: 137 mg, 55%;  $^1\text{H}$  NMR (400 MHz,  $\text{CDCl}_3$ ):  $\delta$  = 7.71–7.63 (m, 1H), 7.42–7.27 (m, 3H), 4.16–3.97 (m, 2H), 3.54 (s, 3H), 2.78–2.66 (m, 1H), 2.18 (dd,  $J$  = 8.5, 4.2 Hz, 1H), 1.11–1.02 (m, 1H).  $^{13}\text{C}$  NMR (100 MHz,  $\text{CDCl}_3$ ):  $\delta$  = 171.9, 170.2, 134.5, 132.9, 131.0, 130.7, 129.7, 126.7, 61.4, 51.9, 43.2, 34.2, 24.2. HRMS (ESI):  $m/z$   $[\text{M} + \text{H}]^+$  calcd for  $\text{C}_{13}\text{H}_{13}\text{ClNO}_2$ : 250.0635; found: 250.0639.

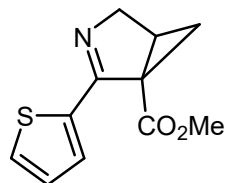

*methyl 2-(thiophen-2-yl)-3-azabicyclo[3.1.0]hex-2-ene-1-carboxylate (4j).* The general procedure E was followed and purification by flash column chromatography afforded **4j** as a yellow solid (PE: EA = 5:1). Yield: 111 mg, 50%; mp: 115–116 °C  $^1\text{H}$  NMR (400 MHz,  $\text{CDCl}_3$ ):  $\delta$  = 7.38 (dd,  $J$  = 13.1, 4.3 Hz, 2H), 7.10–6.99 (dd,  $J$  = 5.0, 3.8 Hz, 1H), 4.21–3.90 (m, 2H), 3.69 (s, 3H), 2.63–2.42 (m, 1H), 2.06 (dd,  $J$  = 8.6, 4.3 Hz, 1H), 0.89–0.76 (m, 1H).  $^{13}\text{C}$  NMR (100 MHz,  $\text{CDCl}_3$ ):  $\delta$  = 169.9, 166.1, 137.8, 130.2, 129.0, 127.3, 61.2, 52.1, 40.9, 32.6, 21.4. HRMS (ESI):  $m/z$   $[\text{M} + \text{H}]^+$  calcd for  $\text{C}_{11}\text{H}_{12}\text{NO}_2\text{S}$ : 222.0589; found: 222.0593.

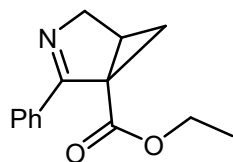

*ethyl 2-phenyl-3-azabicyclo[3.1.0]hex-2-ene-1-carboxylate (4k).*<sup>3</sup> The general procedure E was followed and purification by flash column chromatography afforded **4k** as a yellow oil (PE: EA = 5:1). Yield: 195 mg, 85%;  $^1\text{H}$  NMR (400 MHz,  $\text{CDCl}_3$ ):  $\delta$  = 7.73 (dd,  $J$  = 7.9, 1.6 Hz, 2H), 7.47–7.33 (m, 3H), 4.27–3.91 (m, 4H), 2.63–2.46 (m, 1H), 2.11 (dd,  $J$  = 8.5, 4.1 Hz, 1H), 1.03 (t,  $J$  =

7.1 Hz, 3H), 0.92–0.82 (m, 1H).  $^{13}\text{C}$  NMR (100 MHz,  $\text{CDCl}_3$ ):  $\delta$  = 172.7, 169.9, 133.9, 130.2, 128.1, 128.1, 61.9, 60.9, 40.9, 31.8, 21.4, 13.8.

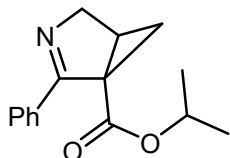

*isopropyl 2-phenyl-3-azabicyclo[3.1.0]hex-2-ene-1-carboxylate (4l)*.<sup>3</sup> The general procedure E was followed and purification by flash column chromatography afforded **4l** as a yellow oil (PE: EA = 5:1). Yield: 241 mg, 99%;  $^1\text{H}$  NMR (400 MHz,  $\text{CDCl}_3$ ):  $\delta$  = 7.80–7.63 (m, 2H), 7.43–7.36 (m, 3H), 5.04–4.87 (m, 1H), 4.23–3.95 (m, 2H), 2.62–2.38 (m, 1H), 2.10 (dd,  $J$  = 8.5, 4.1 Hz, 1H), 1.09 (d,  $J$  = 6.3 Hz, 3H), 0.94 (d,  $J$  = 6.2 Hz, 3H), 0.88–0.85 (m, 1H).  $^{13}\text{C}$  NMR (100 MHz,  $\text{CDCl}_3$ ):  $\delta$  = 173.1, 169.3, 133.9, 130.2, 128.1, 128.0, 68.6, 61.8, 41.2, 31.6, 21.6, 21.3, 21.2.

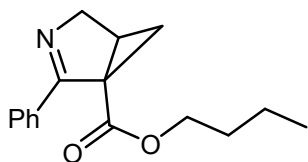

*butyl 2-phenyl-3-azabicyclo[3.1.0]hex-2-ene-1-carboxylate (4m)*. The general procedure E was followed and purification by flash column chromatography afforded **4m** as a yellow oil (PE: EA = 5:1). Yield: 149 mg, 58%;  $^1\text{H}$  NMR (400 MHz,  $\text{CDCl}_3$ ):  $\delta$  = 7.80–7.65 (m, 2H), 7.45–7.35 (m, 3H), 4.22–3.99 (m, 3H), 3.95–3.87 (m, 1H), 2.59–2.47 (m, 1H), 2.11 (dd,  $J$  = 8.5, 4.1 Hz, 1H), 1.44–1.27 (m, 2H), 1.09–0.95 (m, 2H), 0.90–0.85 (m, 1H), 0.74 (t,  $J$  = 7.3 Hz, 3H).  $^{13}\text{C}$  NMR (100 MHz,  $\text{CDCl}_3$ ):  $\delta$  = 172.8, 170.0, 134.0, 130.2, 128.1, 128.0, 64.8, 41.0, 31.9, 30.3, 21.5, 18.7, 13.5. HRMS (ESI):  $m/z$   $[\text{M} + \text{H}]^+$  calcd for  $\text{C}_{16}\text{H}_{20}\text{NO}_2$ : 258.1494; found: 258.1493.

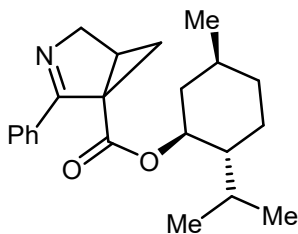

*(1S,2R,5S)-2-isopropyl-5-methylcyclohexyl 2-phenyl-3-azabicyclo[3.1.0]hex-2-ene-1-carboxylate (4n)*.<sup>3</sup> The general procedure E was followed and purification by flash column

chromatography afforded **4n** (dr = 1:4, determined by  $^1\text{H}$  NMR) as a yellow oil (PE: EA = 5:1). Yield: 275 mg, 81%;  $^1\text{H}$  NMR (400 MHz,  $\text{CDCl}_3$ ):  $\delta$  = 7.77–7.62 (m, 2H), 7.46–7.32 (m, 3H), 4.68–4.43 (m, 1H), 4.24–4.08 (m, 1H), 4.07–3.92 (m, 1H), 2.56–2.35 (m, 1H), 2.15–2.02 (m, 1H), 2.01–1.89 (m, 1H), 1.87–1.64 (m, 1H), 1.63–1.48 (m, 2H), 1.45–1.32 (m, 1H), 1.08–0.90 (m, 2H), 0.89–0.78 (m, 5H), 0.77–0.70 (m, 2H), 0.58–0.47 (dd,  $J$  = 20.1, 6.9 Hz, 5H).  $^{13}\text{C}$  NMR (100 MHz,  $\text{CDCl}_3$ ):  $\delta$  = 173.2, 169.2, 134.2, 130.2, 128.2, 127.8, 75.4, 75.1, 62.2, 46.7, 46.4, 40.4, 40.3, 34.0, 31.3, 31.2, 26.6, 24.8, 23.7, 22.6, 21.9, 21.8, 21.1, 20.8, 20.4, 16.7, 15.5. HRMS (ESI):  $m/z$   $[\text{M} + \text{H}]^+$  calcd for  $\text{C}_{22}\text{H}_{30}\text{NO}_2$ : 340.2277; found: 340.2281.

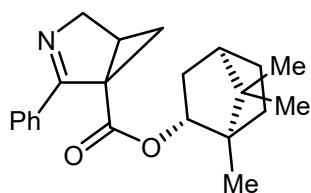

(1*R*,2*R*,4*R*)-1,7,7-trimethylbicyclo[2.2.1]heptan-2-yl 2-phenyl-3-azabicyclo[3.1.0]hex-2-ene-1-carboxylate (**4o**). The general procedure E was followed and purification by flash column chromatography afforded **4o** (dr = 1:2.75, determined by  $^1\text{H}$  NMR) as a yellow oil (PE: EA = 10:1). Yield: 250 mg, 74%;  $^1\text{H}$  NMR (400 MHz,  $\text{CDCl}_3$ ):  $\delta$  = 7.80–7.67 (m, 2H), 7.47–7.32 (m, 3H), 4.76–4.52 (m, 1H), 4.23–3.96 (m, 2H), 2.56–2.42 (m, 1H), 2.19–2.03 (m, 1H), 1.66–1.54 (m, 3H), 1.53–1.28 (m, 2H), 1.11–0.95 (m, 2H), 0.91–0.84 (m, 1H), 0.76–0.69 (m, 5H), 0.62 (s, 1H), 0.49–0.35 (m, 3H).  $^{13}\text{C}$  NMR (100 MHz,  $\text{CDCl}_3$ ):  $\delta$  = 172.9, 169.5, 134.0, 130.3, 128.3, 128.2, 128.1, 128.1, 82.2, 81.5, 61.8, 48.7, 48.5, 46.8, 46.6, 44.8, 41.4, 41.0, 39.0, 37.9, 33.7, 33.6, 31.8, 26.9, 21.3, 21.2, 19.9, 19.4, 19.0, 11.1, 10.9. HRMS (ESI):  $m/z$   $[\text{M} + \text{H}]^+$  calcd for  $\text{C}_{22}\text{H}_{28}\text{NO}_2$ : 338.2120; found: 338.2122.

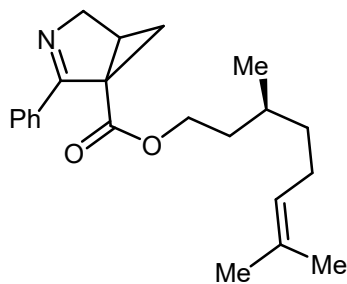

(*S*)-3,7-dimethyloct-6-en-1-yl 2-phenyl-3-azabicyclo[3.1.0]hex-2-ene-1-carboxylate (**4p**). The general procedure E was followed and purification by flash column chromatography afforded **4p**

(dr = 1:1, determined by  $^1\text{H}$  NMR) as a yellow oil (PE: EA = 10:1). Yield: 302 mg, 89%;  $^1\text{H}$  NMR (400 MHz,  $\text{CDCl}_3$ ):  $\delta$  = 7.82–7.66 (m, 2H), 7.45–7.35 (m, 3H), 5.11–4.92 (m, 1H), 4.20–4.07 (m, 2H), 4.06–3.91 (m, 2H), 2.58–2.46 (m, 1H), 2.17–2.07 (m, 1H), 1.91–1.77 (m, 2H), 1.67 (s, 3H), 1.58 (s, 3H), 1.50–1.33 (m, 1H), 1.26–0.95 (m, 4H), 0.91–0.84 (m, 1H), 0.78–0.65 (m, 3H).  $^{13}\text{C}$  NMR (100 MHz,  $\text{CDCl}_3$ ):  $\delta$  = 172.7, 170.0, 170.0, 134.0, 134.0, 131.2, 131.2, 130.2, 130.2, 128.2, 128.1, 128.0, 128.0, 124.5, 63.4, 63.4, 61.9, 61.8, 41.0, 36.9, 36.7, 35.2, 35.0, 31.9, 31.9, 29.1, 28.9, 25.7, 25.3, 25.2, 21.5, 21.4, 19.1, 19.0, 17.6, 17.6. HRMS (ESI):  $m/z$   $[\text{M} + \text{H}]^+$  calcd for  $\text{C}_{22}\text{H}_{30}\text{NO}_2$ : 340.2277; found: 340.2281.

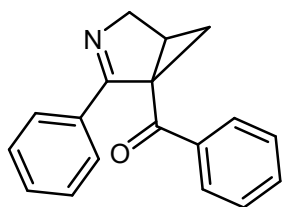

*phenyl(2-phenyl-3-azabicyclo[3.1.0]hex-2-en-1-yl)methanone (4q)*.<sup>2</sup> The general procedure E was followed and purification by flash column chromatography afforded **4q** as a yellow solid (PE: EA = 5:1). Yield: 240 mg, 92%; mp: 115–116 °C.  $^1\text{H}$  NMR (400 MHz,  $\text{CDCl}_3$ ):  $\delta$  = 7.76–7.60 (m, 4H), 7.41–7.34 (m, 1H), 7.31–7.13 (m, 5H), 4.53–4.26 (m, 2H), 2.69–2.54 (m, 1H), 2.37 (dd,  $J$  = 8.3, 4.2 Hz, 1H), 0.82 (t,  $J$  = 4.7 Hz, 1H).  $^{13}\text{C}$  NMR (100 MHz,  $\text{CDCl}_3$ ):  $\delta$  = 196.1, 175.2, 137.2, 133.1, 132.8, 130.6, 128.4, 128.4, 128.2, 128.1, 62.5, 47.7, 32.9, 18.6.

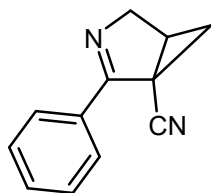

*2-phenyl-3-azabicyclo[3.1.0]hex-2-ene-1-carbonitrile (4r)*.<sup>2</sup> The general procedure E was followed and purification by flash column chromatography afforded **4r** as a yellow solid (PE: EA = 5:1). Yield: 58 mg, 32%; mp: 47–48 °C.  $^1\text{H}$  NMR (400 MHz,  $\text{CDCl}_3$ ):  $\delta$  = 8.10–7.88 (m, 2H), 7.58–7.40 (m, 3H), 4.34–4.04 (m, 2H), 2.90–2.73 (m, 1H), 1.89 (dd,  $J$  = 8.7, 4.6 Hz, 1H), 1.00 (dd,  $J$  = 5.5, 5.0 Hz, 1H).  $^{13}\text{C}$  NMR (100 MHz,  $\text{CDCl}_3$ ):  $\delta$  = 168.5, 131.5, 131.4, 128.7, 128.2, 118.7, 62.0, 29.8, 24.7, 22.9.

## Control experiment

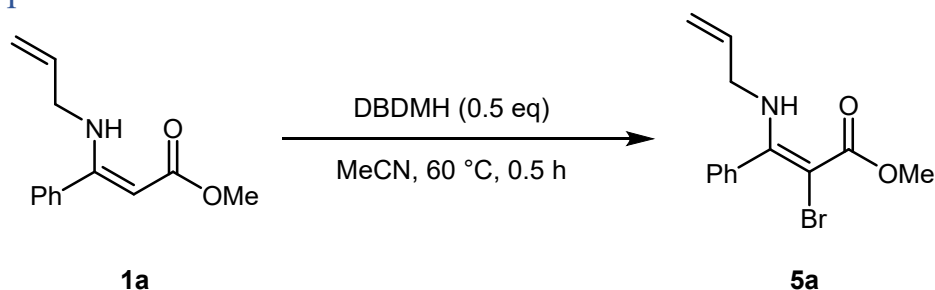

Scheme 7

To a solution of N-allyl enamine **1** (1 mmol) in MeCN (1.5 mL) was added DBDMH (0.5 mmol). The reaction mixture was stirred at 60 °C for 0.5 h, then cooled to room temperature. DCM (50 mL) was added, and the mixture was washed with brine (15 mL × 2). The organic layer was dried over Na<sub>2</sub>SO<sub>4</sub>, filtered and concentrated under reduced pressure to obtain a residue. This residue was purified by flash column chromatography to yield **5a** as a colorless oil (PE: EA = 100:1).<sup>1</sup> Yield: 274 mg, 93%. <sup>1</sup>H NMR (400 MHz, CDCl<sub>3</sub>): δ = 9.32 (s, 1H), 7.45–7.41 (m, 3H), 7.23–7.19 (m, 2H), 5.76–5.66 (m, 1H), 5.18–5.07 (m, 2H), 3.80 (s, 3H), 3.54–3.48 (m, 2H). <sup>13</sup>C NMR (100 MHz, CDCl<sub>3</sub>): δ = 168.1, 163.7, 135.6, 134.7, 129.1, 128.5, 128.3, 127.7, 116.1, 51.9, 47.8.

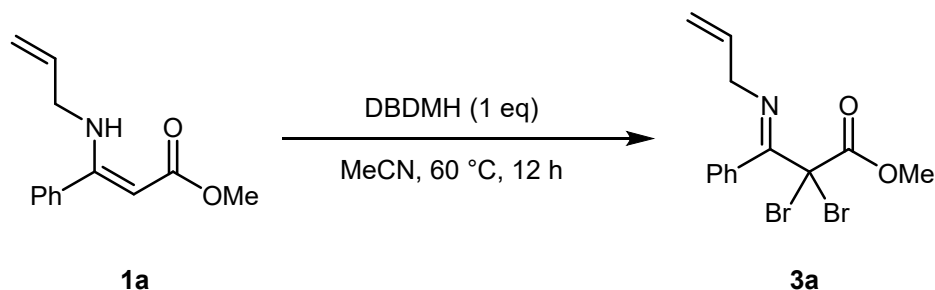

Scheme 8

To a solution of N-allyl enamine **1** (1 mmol) in MeCN (1.5 mL), DBDMH (1 mmol) was added. The reaction mixture was stirred at 60 °C for 12 h, then cooled to room temperature. DCM (50 mL) was added, and the mixture was washed with brine (15 mL × 2). The organic layer was dried over Na<sub>2</sub>SO<sub>4</sub>, filtered and concentrated under reduced pressure to obtain a residue. This residue was purified by flash column chromatography to yield **3a** as a colorless oil (PE: EA = 100:1). Yield: 291 mg, 78%.

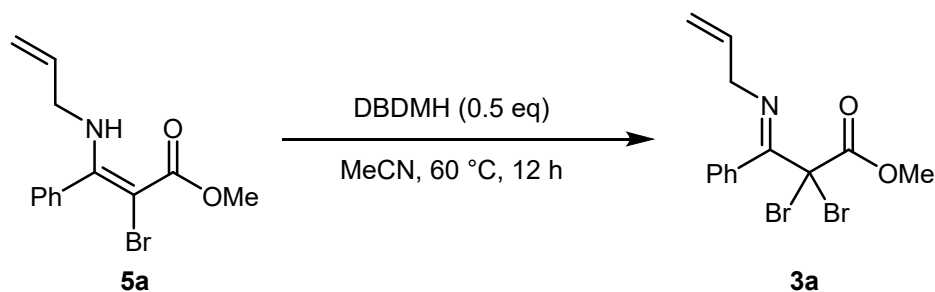

Scheme 9

To a solution of **5a** (1 mmol) in MeCN (1.5 mL), DBDMH (0.5 mmol) was added. The reaction mixture was stirred at 60 °C for 12 h, then cooled to room temperature. DCM (50 mL) was added, and the reaction mixture was washed with brine (15 mL×2). The organic layer was dried over Na<sub>2</sub>SO<sub>4</sub>, filtered and concentrated under reduced pressure to obtain a residue. This residue was purified by flash column chromatography to yield **3a** as a colorless oil (PE: EA = 100:1). Yield: 283 mg, 76%.

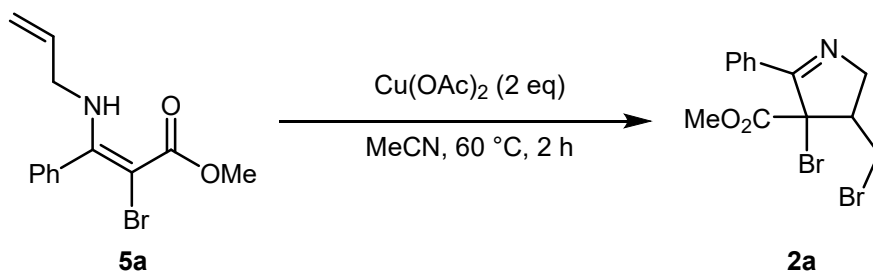

Scheme 10

To a solution of **5a** (1 mmol) in MeCN (1.5 mL), Cu(OAc)<sub>2</sub> (2 mmol) was added. The reaction mixture was stirred at 60 °C for 2 h, then cooled to room temperature. DCM (50 mL) was added, and the mixture was washed with brine (15 mL × 2). The organic layer was dried over with Na<sub>2</sub>SO<sub>4</sub>, filtered and concentrated under reduced pressure to obtain a residue. This residue was purified by flash column chromatography to yield **2a** as a colorless oil (PE: EA = 10:1). Yield: 149 mg, 40%.

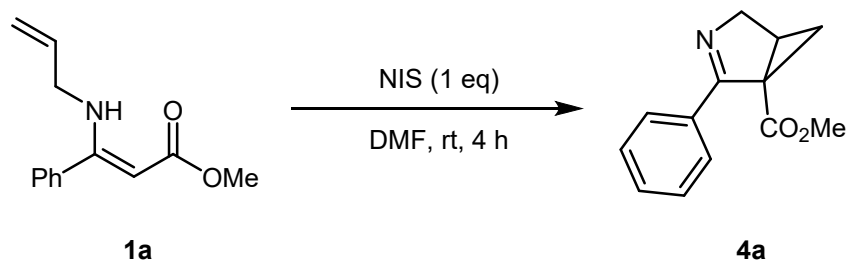

### Scheme 11

To a solution of N-allyl enamine **1a** (1 mmol) in DMF (1.5 mL), NIS (1 mmol) was added. The reaction mixture was stirred at room temperature for 4 h. After monitoring the reaction to completion by TLC, the reaction mixture was cooled to room temperature, and EtOAc (50 mL) was added. The reaction mixture was washed with brine (15 mL×2), and the organic layer was dried over with Na<sub>2</sub>SO<sub>4</sub>, filtered and concentrated under reduced pressure to obtain a residue. This residue was purified by flash column chromatography to yield 3-azabicyclo[3.1.0]hex-2-enes **4a** as a yellow oil (PE:EA = 5:1). Yield: 49 mg, 23%.

### Application

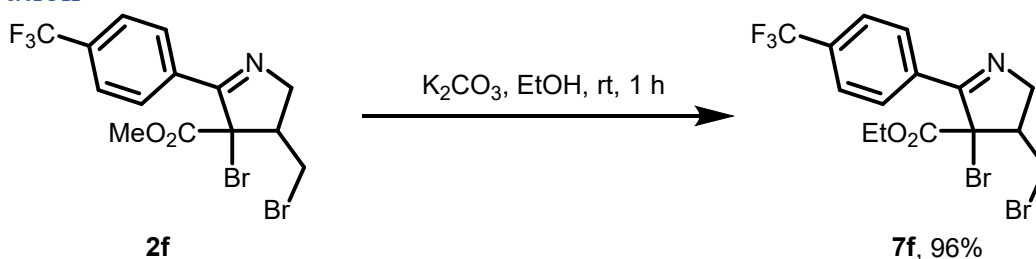

### Scheme 12

To a solution of dibromo 1-pyrrolines **2f** (1 mmol) in EtOH (1.5 mL), K<sub>2</sub>CO<sub>3</sub> (1.5 mmol) was added. The mixture was stirred at room temperature for 1 h. Upon completion (monitored by TLC), the reaction mixture was cooled to room temperature, and EtOAc (50 mL) was added. The organic layer was washed with brine (15 mL × 2), dried over Na<sub>2</sub>SO<sub>4</sub>, filtered, and concentrated under reduced pressure to afford a residue. The residue was purified by flash column chromatography to yield **7f** as a yellow oil (PE:EA = 10:1). Yield: 437 mg, 96%; <sup>1</sup>H NMR (400 MHz, CDCl<sub>3</sub>): δ = 8.03 (d, *J* = 8.3 Hz, 2H), 7.66 (d, *J* = 8.3 Hz, 2H), 4.39 (dd, *J* = 16.7, 6.7 Hz, 1H), 4.23 (qd, *J* = 7.1, 0.7 Hz, 2H), 3.73–3.61 (m, 3H), 3.32–3.19 (m, 1H), 1.15 (t, *J* = 7.1 Hz, 3H). <sup>13</sup>C NMR (100 MHz, CDCl<sub>3</sub>): δ = 169.6, 167.2, 134.0, 133.0 (q, *J* = 32 Hz), 128.5, 125.5 (q, *J* = 3 Hz), 123.6 (d, *J* = 271 Hz), 70.2, 64.0, 62.6, 53.3, 29.7, 13.7. HRMS (ESI): *m/z* [M + H]<sup>+</sup> calcd for C<sub>15</sub>H<sub>15</sub>Br<sub>2</sub>F<sub>3</sub>NO<sub>2</sub>: 455.9422; found: 455.9420.

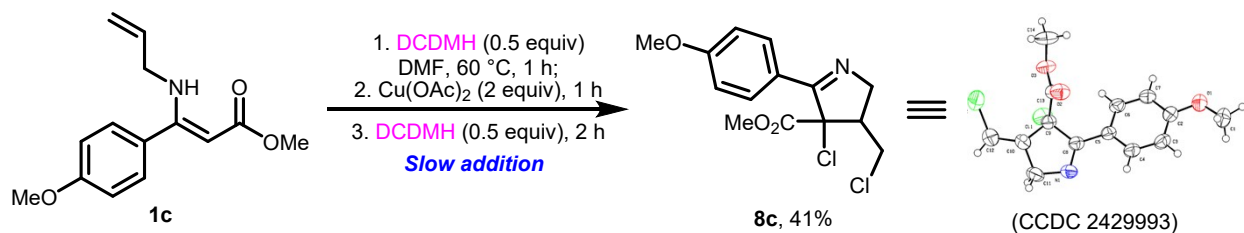

Scheme 13

To a solution of N-allyl enamine **1c** (1 mmol) in DMF (1.5 mL), DCDMH (0.5 mmol) was added. The mixture was stirred at 60 °C for 1 h, after which Cu(OAc)<sub>2</sub> (2 mmol) was added. After 1 hour, an additional portion of DCDMH (0.5 mmol) was added in 5 batches over 2 hours. Upon completion (monitored by TLC), the reaction mixture was cooled to room temperature, and EtOAc (50 mL) was added. The organic layer was washed with brine (15 mL × 2), dried over Na<sub>2</sub>SO<sub>4</sub>, filtered, and concentrated under reduced pressure to afford a residue. The residue was purified by flash column chromatography to yield **8c** as a yellow solid (PE:EA = 10:1). Yield: 129 mg, 41%; mp 88–89 °C. <sup>1</sup>H NMR (400 MHz, CDCl<sub>3</sub>): δ = 7.86–7.72 (m, 2H), 6.92–6.86 (m, 2H), 4.37–4.30 (m, 1H), 3.94–3.85 (m, 2H), 3.83 (s, 3H), 3.76 (s, 3H), 3.74–3.69 (m, 1H), 3.52–3.36 (m, 1H). <sup>13</sup>C NMR (100 MHz, CDCl<sub>3</sub>): δ = 169.3, 168.7, 161.8, 131.0, 129.3, 123.5, 114.0, 61.9, 55.3, 54.1, 53.6, 41.3, 25.8. HRMS (ESI): m/z [M + H]<sup>+</sup> calcd for C<sub>14</sub>H<sub>16</sub>Cl<sub>2</sub>NO<sub>3</sub>: 316.0507; found: 316.0508.

### X-Ray crystallographic studies

Method of crystallization: A solution of **2f**, **4j** and **8c** in CH<sub>2</sub>Cl<sub>2</sub> was left in the hood, and the solvent was allowed to evaporate slowly. The crystal structures have been deposited at the Cambridge Crystallographic Data Centre. CCDC 2402930 (**2f**), CCDC 2429981 (**4j**) and 2429993 (**8c**) which contains the supplementary crystallographic data for this paper. These data can be obtained free of charge via the internet at <https://www.ccdc.cam.ac.uk/structures/>

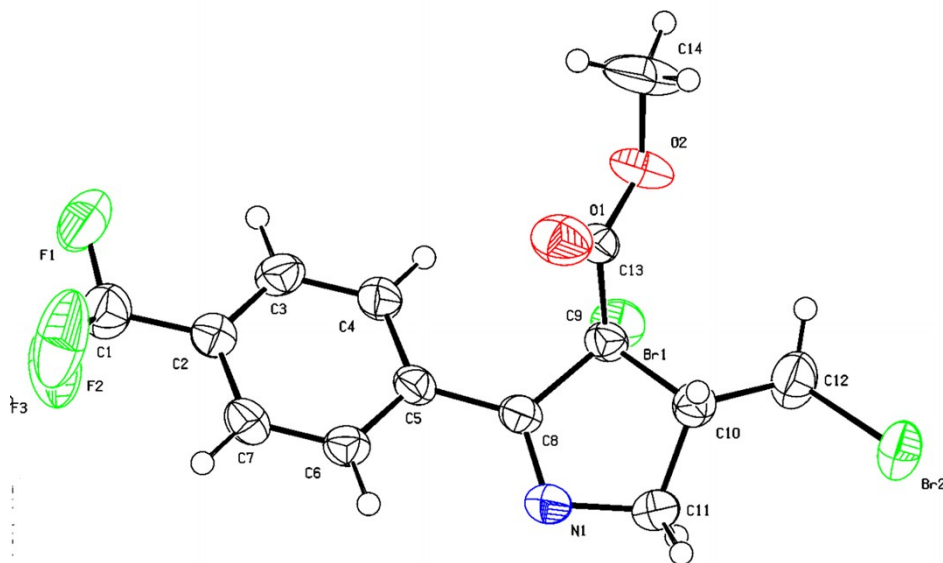

**Figure S1. ORTEP X-ray structure of 2f**

**Table S1.** Crystal data and structure refinement for **2f**

|                                   |                                                                                                                             |
|-----------------------------------|-----------------------------------------------------------------------------------------------------------------------------|
| Empirical formula                 | C <sub>14</sub> H <sub>12</sub> Br <sub>2</sub> F <sub>3</sub> NO <sub>2</sub>                                              |
| Formula weight                    | 443.07                                                                                                                      |
| Temperature                       | 296.15 K                                                                                                                    |
| Wavelength                        | 0.71073 Å                                                                                                                   |
| Crystal system, space group       | triclinic, P-1                                                                                                              |
| Unit cell dimensions              | a = 7.8205(4) Å    alpha = 69.3080(10)°<br>b = 9.2042(4) Å    beta = 77.6970(10)°<br>c = 11.7867(5) Å    gamma = 86.335(2)° |
| Volume                            | 775.41(6) Å <sup>3</sup>                                                                                                    |
| Z, Calculated density             | 2, 1.898 g/cm <sup>3</sup>                                                                                                  |
| Absorption coefficient            | 5.264 mm <sup>-1</sup>                                                                                                      |
| F(000)                            | 432.0                                                                                                                       |
| Crystal size                      | 0.22 × 0.2 × 0.18 mm <sup>3</sup>                                                                                           |
| Theta range for data collection   | 5.332 to 56.658°                                                                                                            |
| Index ranges                      | -10 ≤ h ≤ 10, -11 ≤ k ≤ 12, -15 ≤ l ≤ 15                                                                                    |
| Reflections collected             | 14548                                                                                                                       |
| Independent reflections           | 3807 [R(int) = 0.0408, R(sigma) = 0.0527]                                                                                   |
| Completeness to theta = 28.329°   | 98.2 %                                                                                                                      |
| Absorption correction             | Semi-empirical from equivalents                                                                                             |
| Refinement method                 | Full-matrix least-squares on F <sup>2</sup>                                                                                 |
| Data / restraints / parameters    | 3807 / 0 / 200                                                                                                              |
| Goodness-of-fit on F <sup>2</sup> | 1.017                                                                                                                       |
| Final R indices [I > 2sigma(I)]   | R1 = 0.0438, wR2 = 0.0924                                                                                                   |
| R indices (all data)              | R1 = 0.0867, wR2 = 0.1080                                                                                                   |

|                             |                                   |
|-----------------------------|-----------------------------------|
| Extinction coefficient      | n/a                               |
| Largest diff. peak and hole | 0.93 and -0.52 e. Å <sup>-3</sup> |

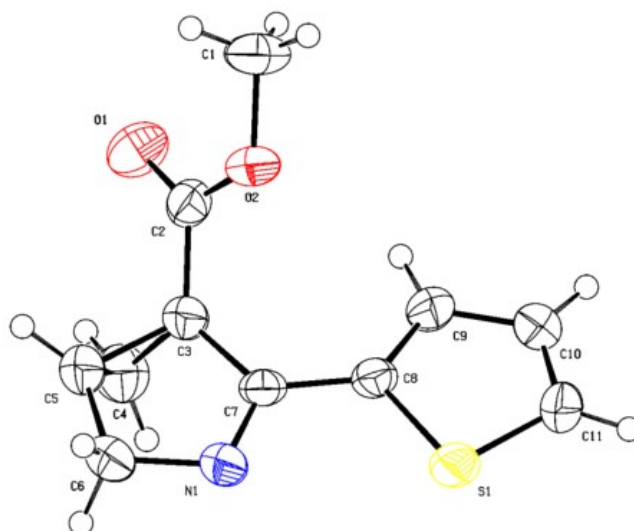

**Figure S2. ORTEP X-ray structure of 4j**

**Table S2.** Crystal data and structure refinement for **4j**

|                                   |                                                                                                      |
|-----------------------------------|------------------------------------------------------------------------------------------------------|
| Empirical formula                 | C <sub>11</sub> H <sub>11</sub> NO <sub>2</sub> S                                                    |
| Formula weight                    | 221.27                                                                                               |
| Temperature                       | 296.15 K                                                                                             |
| Wavelength                        | 0.71073 Å                                                                                            |
| Crystal system, space group       | monoclinic, P2 <sub>1</sub> /n                                                                       |
| Unit cell dimensions              | a= 6.601(3) Å    alpha = 90°<br>b= 6.611(3) Å    beta = 97.223(14)°<br>c= 24.701(9) Å    gamma = 90° |
| Volume                            | 1069.4(8) Å <sup>3</sup>                                                                             |
| Z, Calculated density             | 4, 1.374 g/cm <sup>3</sup>                                                                           |
| Absorption coefficient            | 0.281 mm <sup>-1</sup>                                                                               |
| F(000)                            | 464.0                                                                                                |
| Crystal size                      | 0.22 × 0.2 × 0.18 mm <sup>3</sup>                                                                    |
| Theta range for data collection   | 6.234 to 50.06°                                                                                      |
| Index ranges                      | -7 ≤ h ≤ 7, -6 ≤ k ≤ 7, -29 ≤ l ≤ 29                                                                 |
| Reflections collected             | 11335                                                                                                |
| Independent reflections           | 1858 [R(int) = 0.0518, R(sigma) = 0.0407]                                                            |
| Completeness to theta = 25.030°   | 98.5 %                                                                                               |
| Absorption correction             | Semi-empirical from equivalents                                                                      |
| Refinement method                 | Full-matrix least-squares on F <sup>2</sup>                                                          |
| Data / restraints / parameters    | 1858 / 0 / 137                                                                                       |
| Goodness-of-fit on F <sup>2</sup> | 1.064                                                                                                |

|                               |                                   |
|-------------------------------|-----------------------------------|
| Final R indices [I>2sigma(I)] | R1 = 0.0536, wR2 = 0.1166         |
| R indices (all data)          | R1 = 0.0818, wR2 = 0.1306         |
| Extinction coefficient        | n/a                               |
| Largest diff. peak and hole   | 0.19 and -0.26 e. Å <sup>-3</sup> |

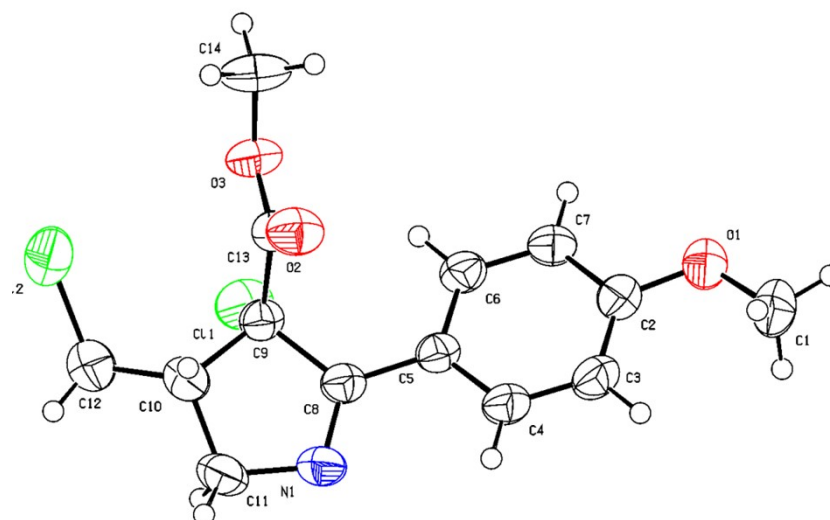

**Figure S3. ORTEP X-ray structure of **8c****

**Table S3.** Crystal data and structure refinement for **8c**

|                                 |                                                                                                                             |
|---------------------------------|-----------------------------------------------------------------------------------------------------------------------------|
| Empirical formula               | C <sub>14</sub> H <sub>15</sub> Cl <sub>2</sub> NO <sub>3</sub>                                                             |
| Formula weight                  | 316.17                                                                                                                      |
| Temperature                     | 296.15 K                                                                                                                    |
| Wavelength                      | 0.71073 Å                                                                                                                   |
| Crystal system, space group     | triclinic, P-1                                                                                                              |
| Unit cell dimensions            | a = 7.1404(6) Å    alpha = 102.274(3)°<br>b = 9.9152(10) Å    beta = 95.146(2)°<br>c = 11.5518(10) Å    gamma = 111.046(2)° |
| Volume                          | 733.38(12) Å <sup>3</sup>                                                                                                   |
| Z, Calculated density           | 2, 1.432 g/cm <sup>3</sup>                                                                                                  |
| Absorption coefficient          | 0.448 mm <sup>-1</sup>                                                                                                      |
| F(000)                          | 328.0                                                                                                                       |
| Crystal size                    | 0.22 × 0.2 × 0.18 mm <sup>3</sup>                                                                                           |
| Theta range for data collection | 5.046 to 50.096°                                                                                                            |
| Index ranges                    | -8 ≤ h ≤ 7, -11 ≤ k ≤ 11, -13 ≤ l ≤ 13                                                                                      |
| Reflections collected           | 9849                                                                                                                        |
| Independent reflections         | 2563 [R(int) = 0.0510, R(sigma) = 0.0613]                                                                                   |
| Completeness to theta = 25.048° | 98.8 %                                                                                                                      |
| Absorption correction           | Semi-empirical from equivalents                                                                                             |
| Refinement method               | Full-matrix least-squares on F <sup>2</sup>                                                                                 |
| Data / restraints / parameters  | 2563 / 0 / 183                                                                                                              |

|                                   |                                   |
|-----------------------------------|-----------------------------------|
| Goodness-of-fit on F <sup>2</sup> | 1.013                             |
| Final R indices [I>2sigma(I)]     | R1 = 0.0516, wR2 = 0.0847         |
| R indices (all data)              | R1 = 0.1116, wR2 = 0.1063         |
| Extinction coefficient            | n/a                               |
| Largest diff. peak and hole       | 0.25 and -0.29 e. Å <sup>-3</sup> |

## References

1. Duan, X.-Y.; Wang, J.-Q.; Li, H.; Du, F.-J.; Chen, R.; Lian, W.-D.; Shi, M.-X., Tandem site-selective bromination and highly regioselective Heck reaction of N-allyl enaminones: chemodivergent synthesis of polysubstituted pyrroles and pyridines. *Organic Chemistry Frontiers* **2024**, 11(19), 5532-5537.
2. Toh, K. K.; Biswas, A.; Wang, Y.-F.; Tan, Y. Y.; Chiba, S., Copper-Mediated Oxidative Transformation of N-Allyl Enamine Carboxylates toward Synthesis of Azaheterocycles. *Journal of the American Chemical Society* **2014**, 136 (16), 6011-6020.
3. Baidya, M.; Kumbhakar, P.; De Sarkar, S., Metal-Free Electrocatalytic Synthesis of Fused Azabicycles from N-Allyl Enamine Carboxylates. *Organic Letters* **2024**, 26(13), 2651-2655.
4. Zhai, S.-X.; Dong, H.-R.; Chen, Z.-B.; Hu, Y.-M.; Dong, H.-S., Cascade synthesis of 3-aza-bicyclo[3.1.0]hex-2-ene derivatives from N-allyl enamines. *Tetrahedron* **2014**, 70 (44), 8405-8412.

# NMR Spectra

(2*R*,5*S*)-2-isopropyl-5-methylcyclohexyl 3-oxo-3-phenylpropanoate (S1)

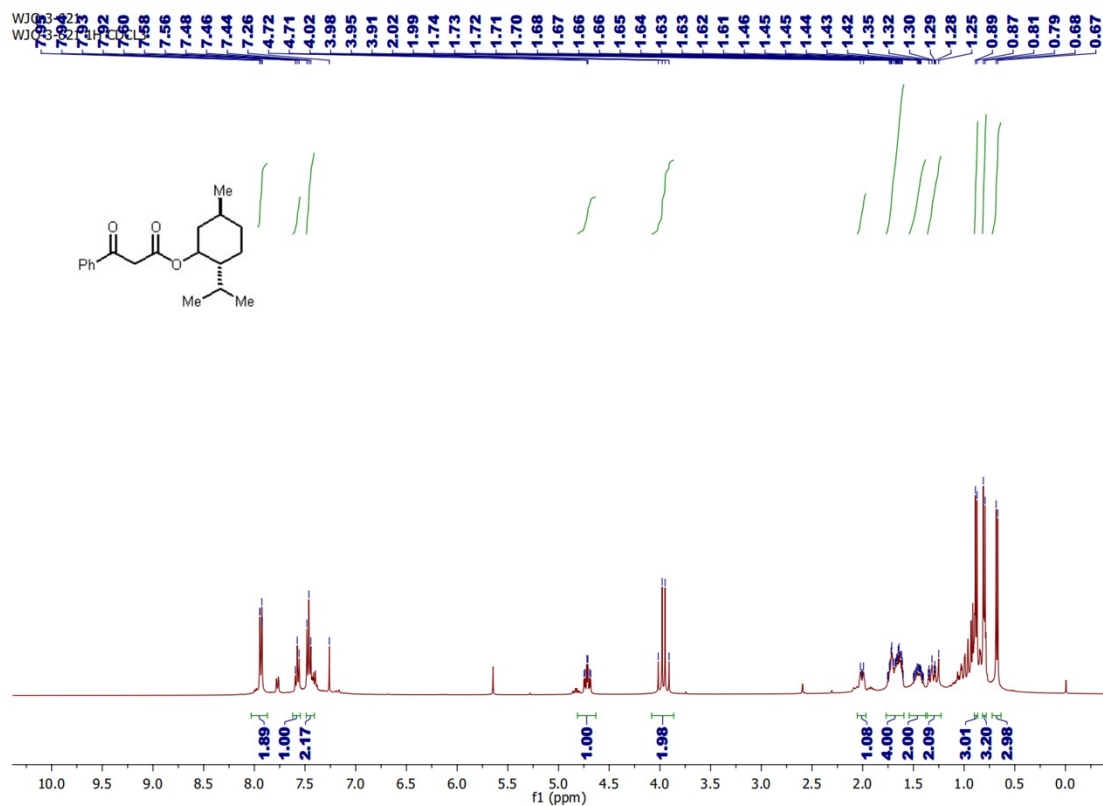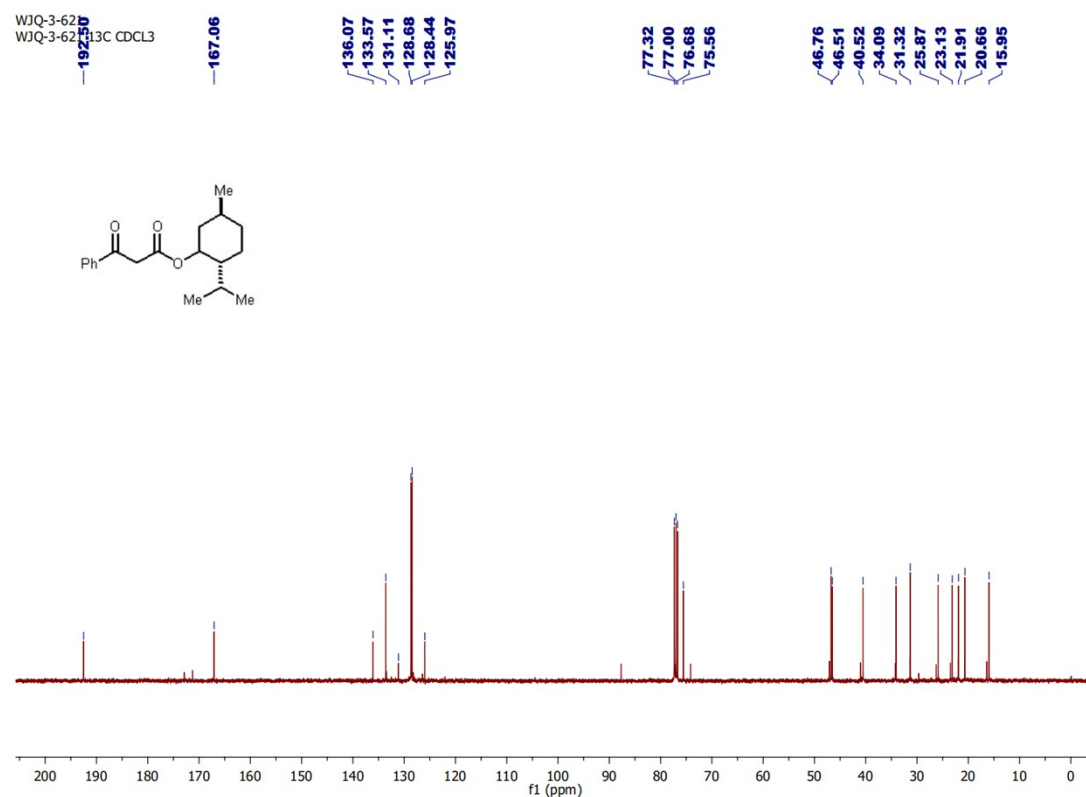

(1*R*,4*R*)-1,7,7-trimethylbicyclo[2.2.1]heptan-2-yl 3-oxo-3-phenylpropanoate (**S2**)

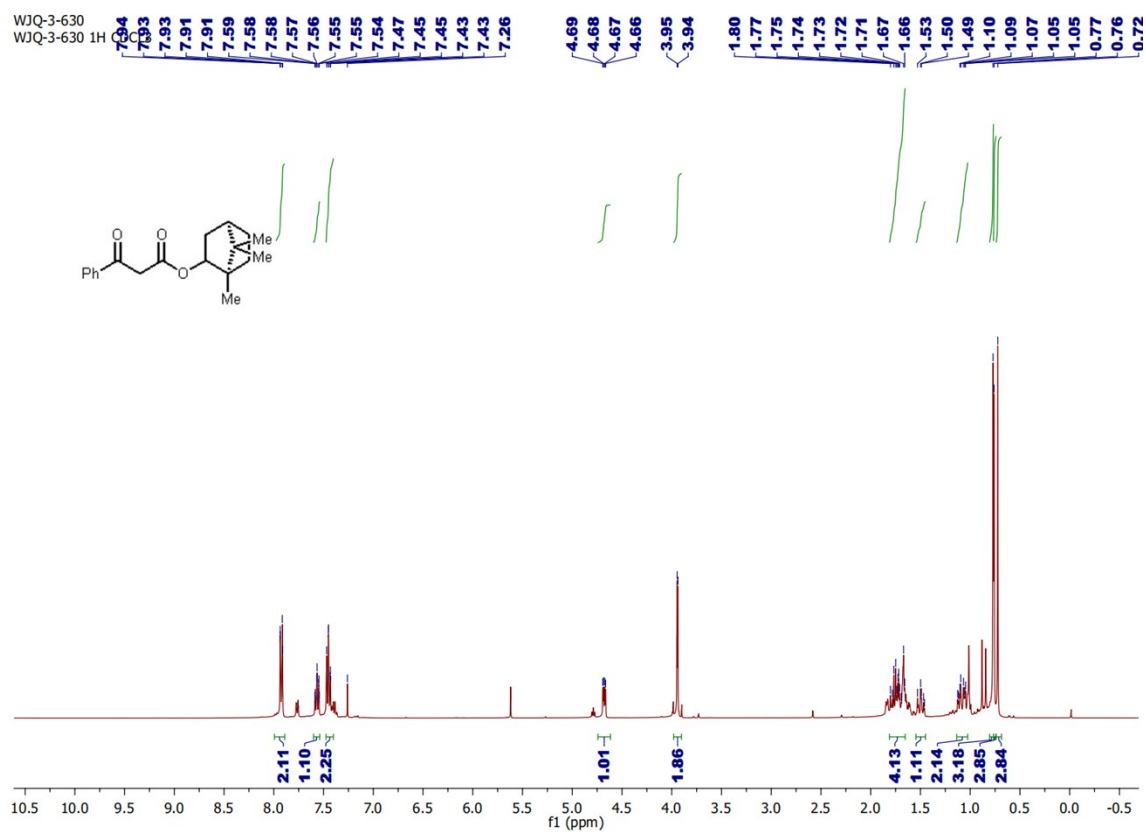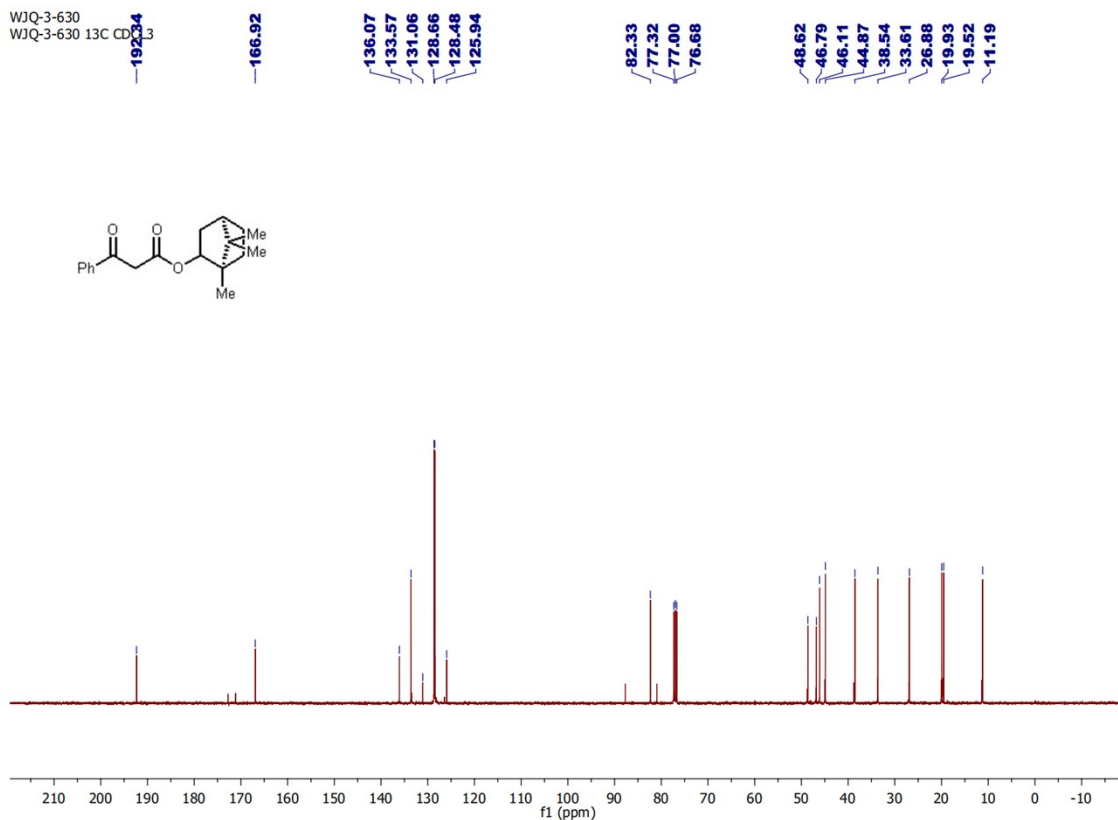

(S)-3,7-dimethyloct-6-en-1-yl 3-oxo-3-phenylpropanoate (S3)

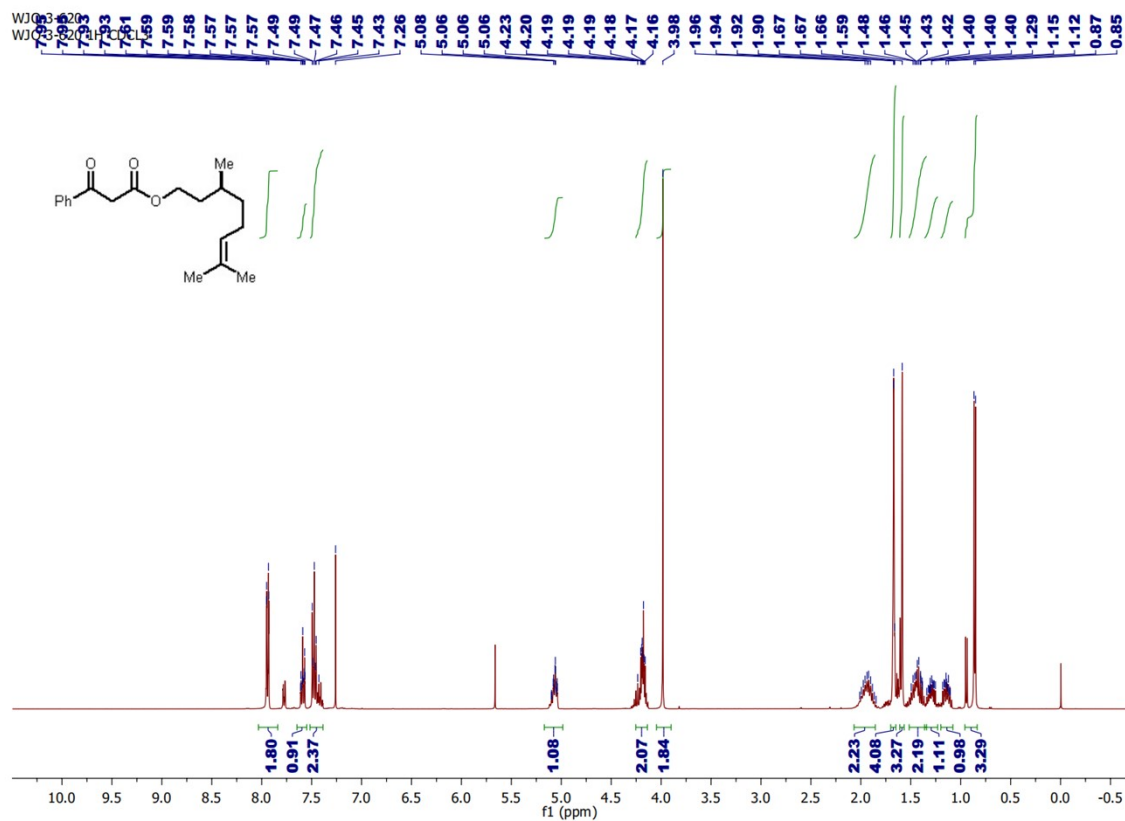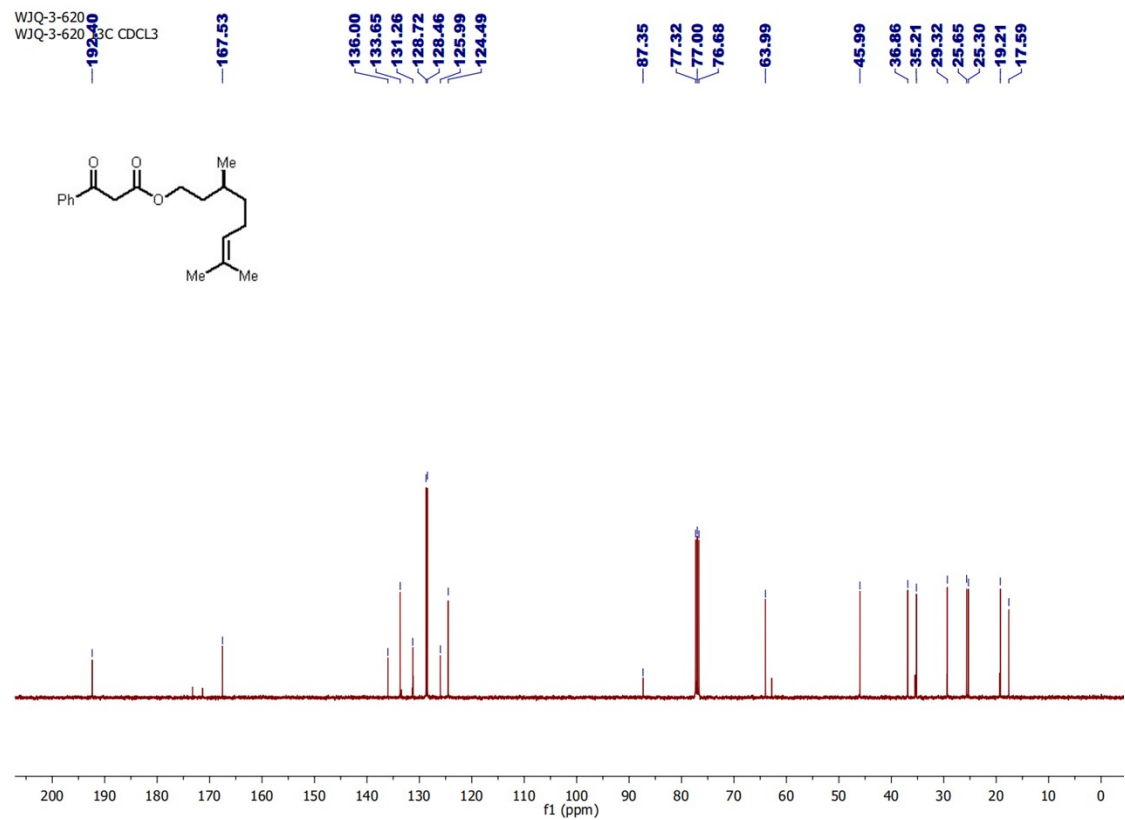

ethyl (Z)-3-(allylamino)-3-phenylacrylate (**1k**)

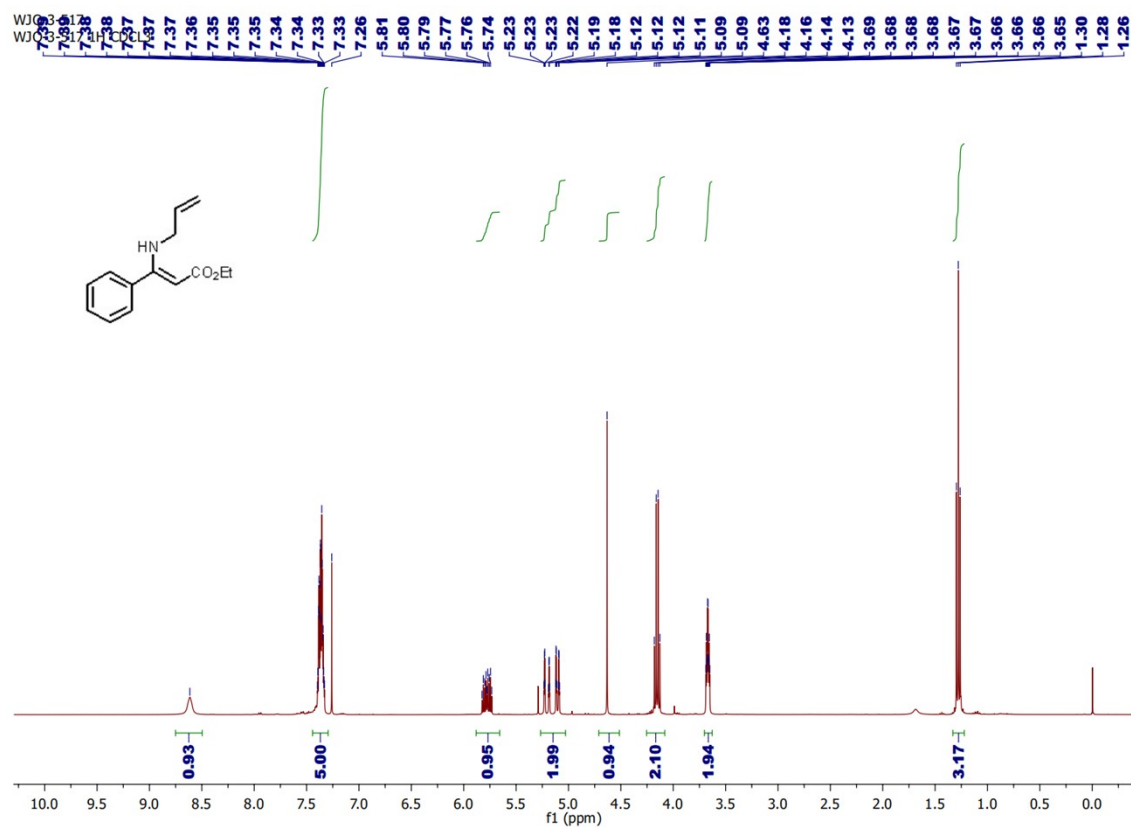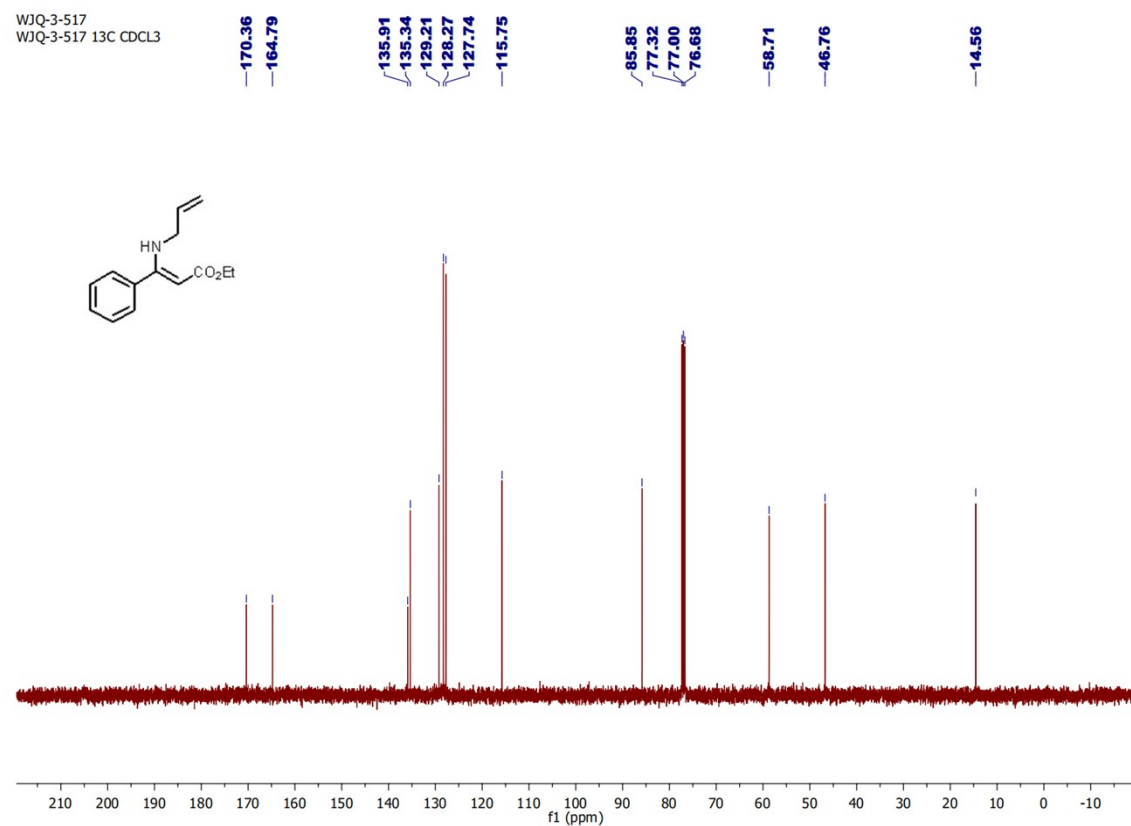

isopropyl (Z)-3-(allylamino)-3-phenylacrylate (**11**)

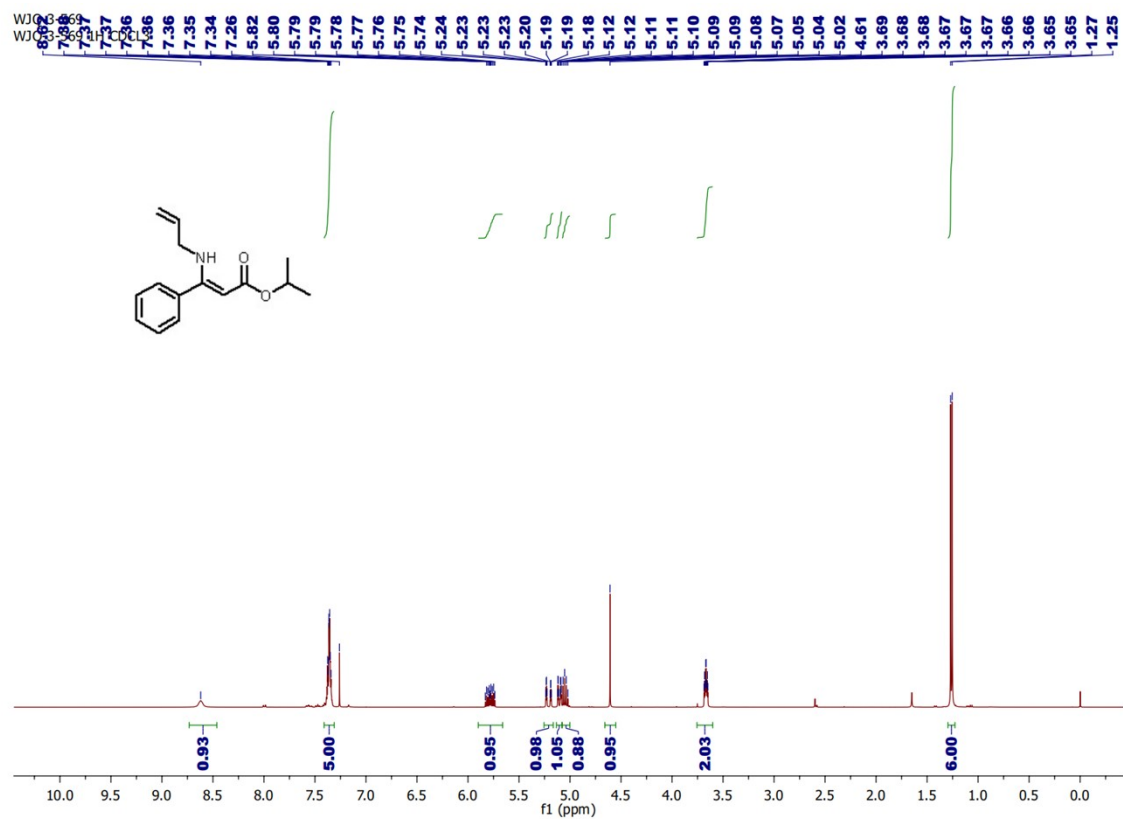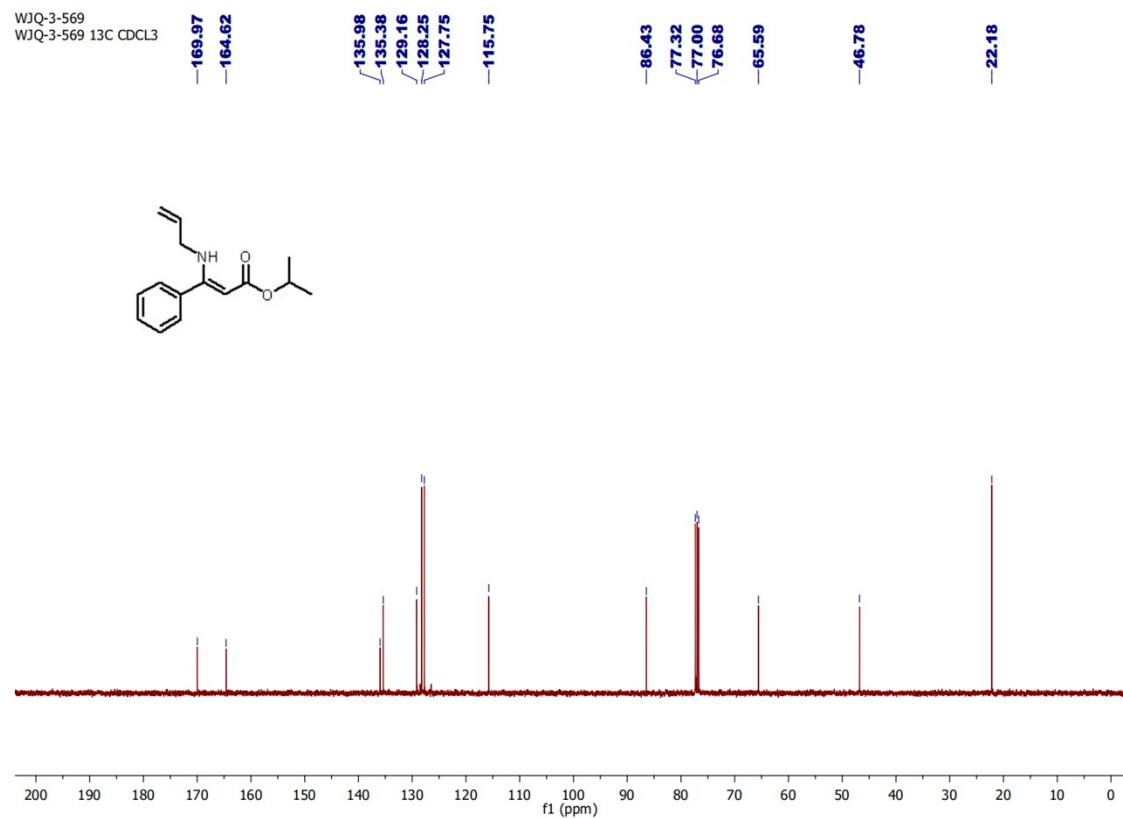

butyl (Z)-3-(allylamino)-3-phenylacrylate (**1m**)

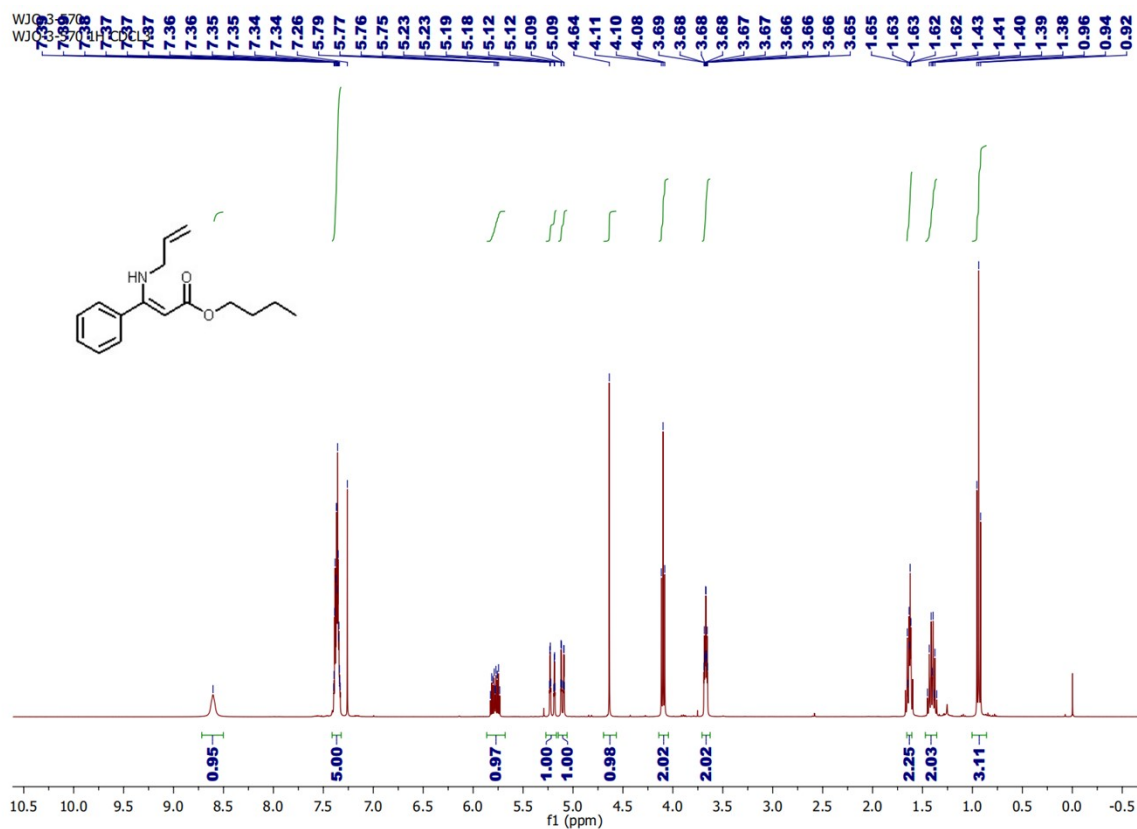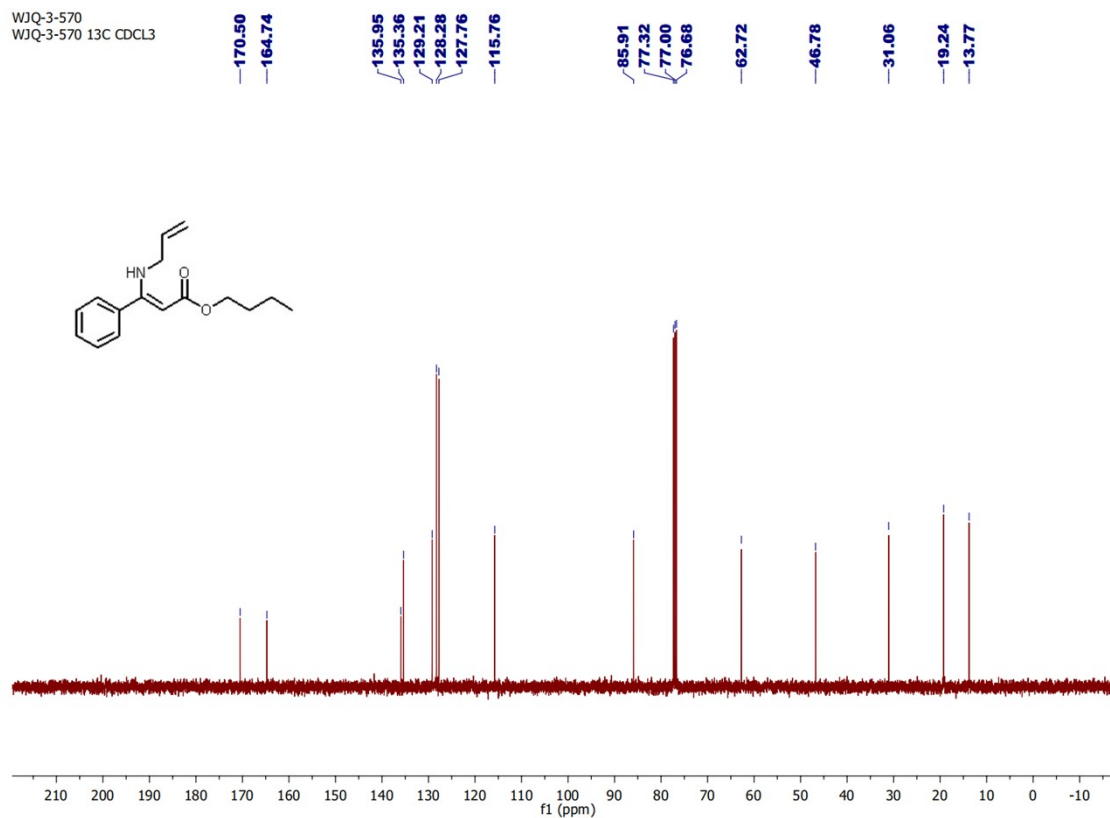

(2*R*,5*S*)-2-isopropyl-5-methylcyclohexyl (Z)-3-(allylamino)-3-phenylacrylate (**1n**)

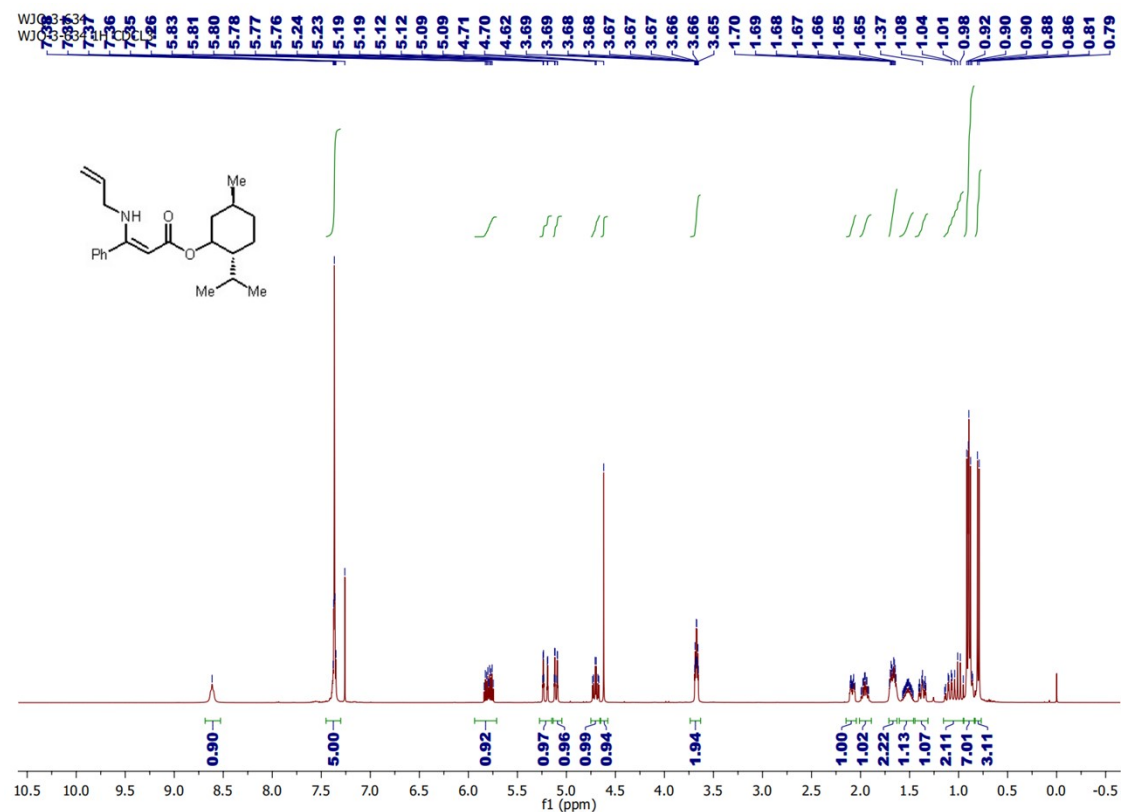

WJQ-3-634  
WJQ-3-634 13C CDCL3

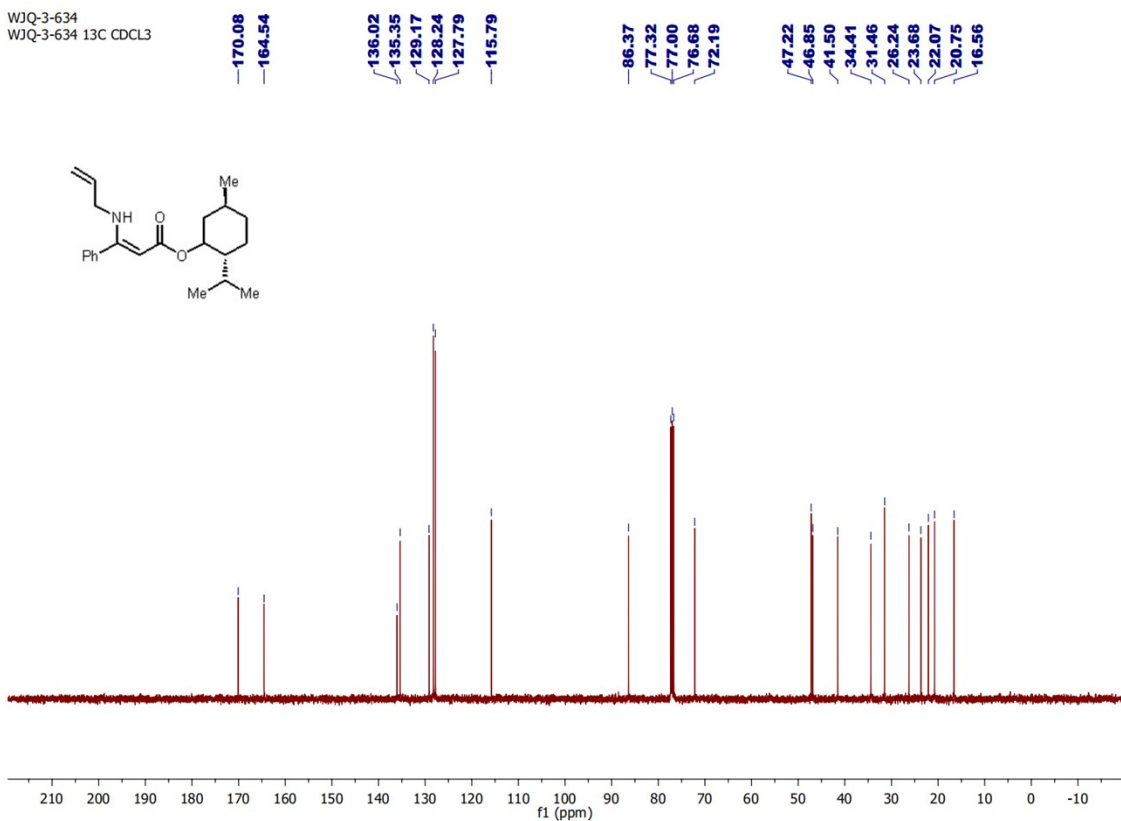

(1*R*,4*R*)-1,7,7-trimethylbicyclo[2.2.1]heptan-2-yl (Z)-3-(allylamino)-3-phenylacrylate (**1o**)

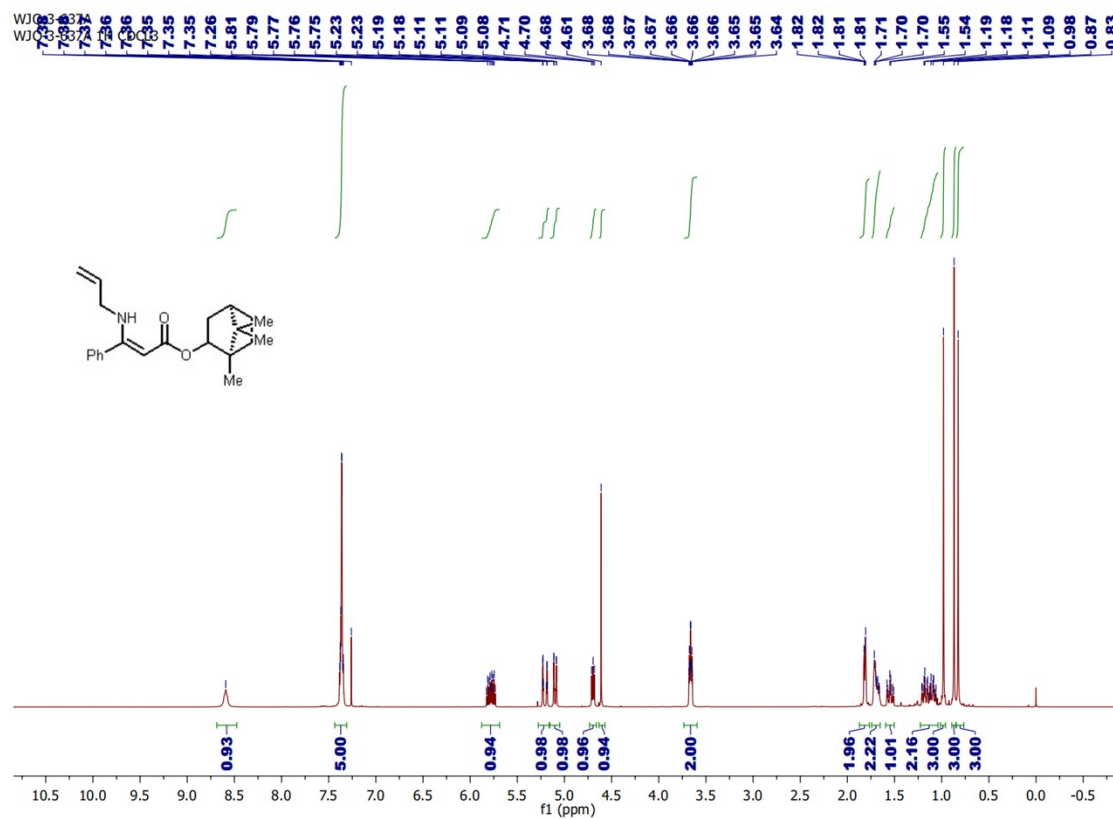

WJQ-3-637A  
WJQ-3-637A 13C CDCl<sub>3</sub>

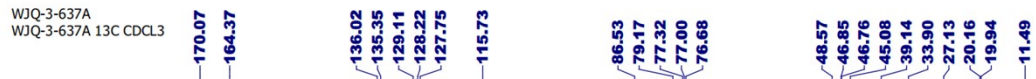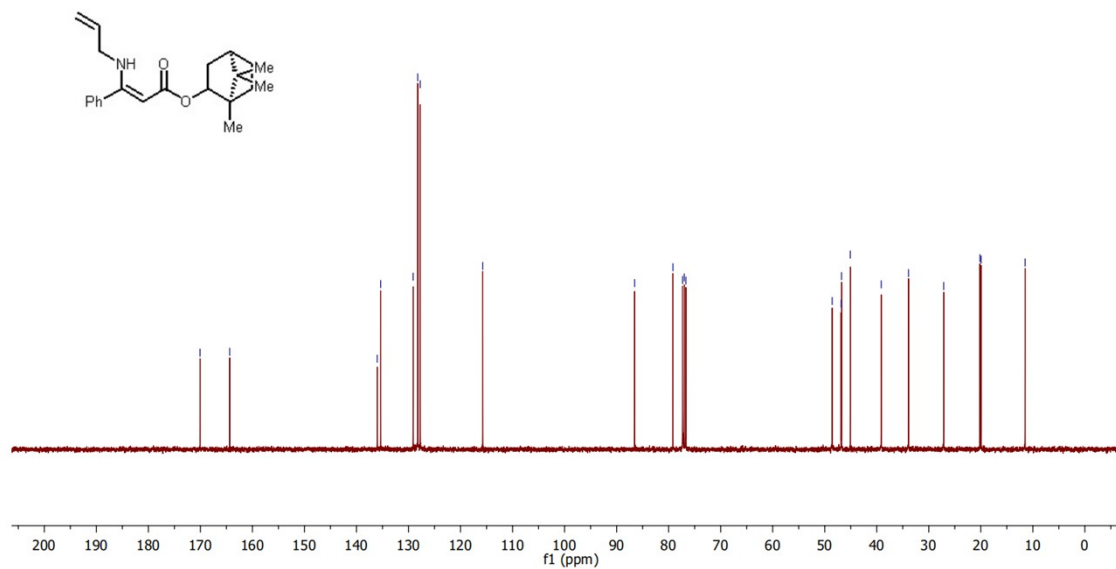

(S)-3,7-dimethyloct-6-en-1-yl (Z)-3-(allylamino)-3-phenylacrylate (**1p**)

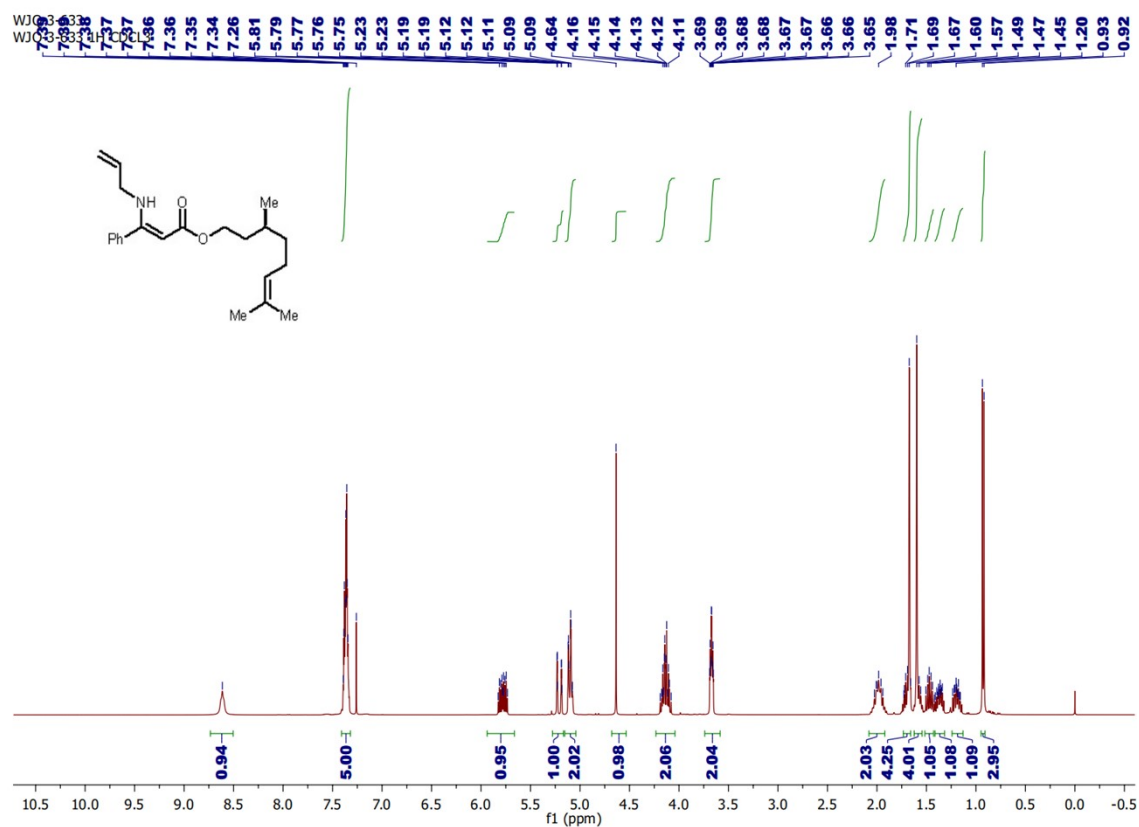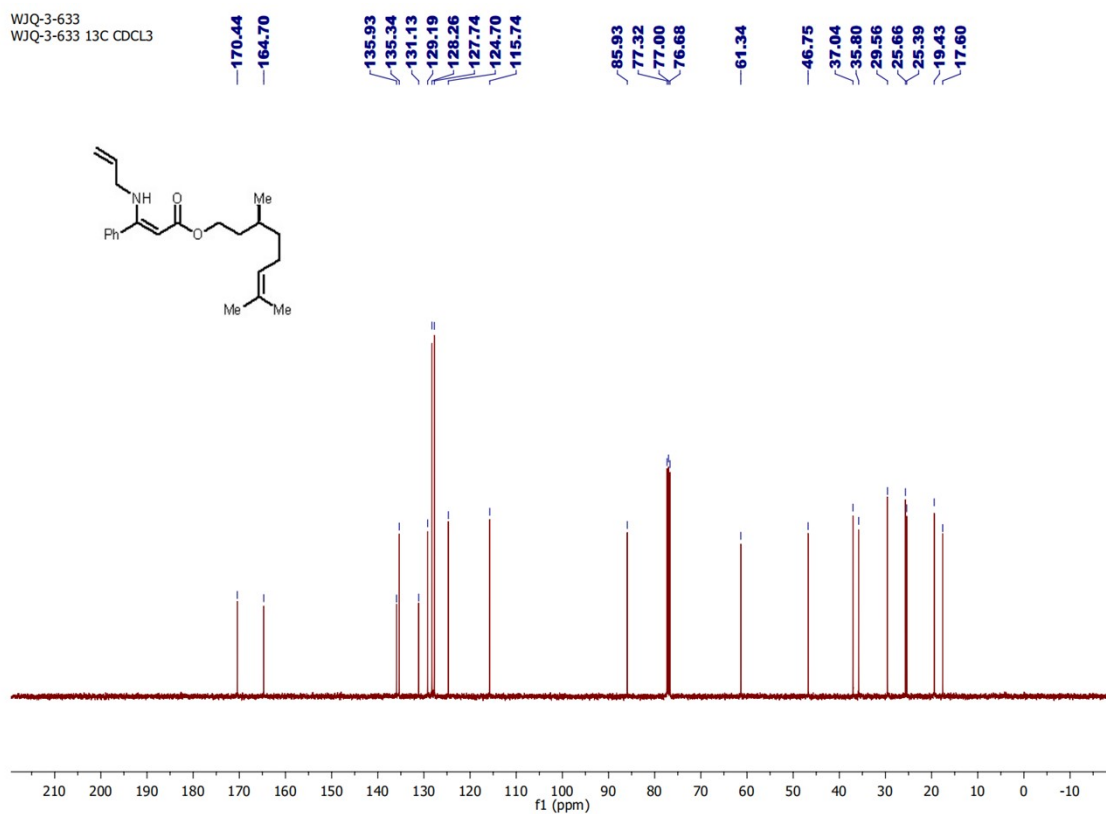

3-(allylamino)-3-phenylacrylonitrile (**1r**)

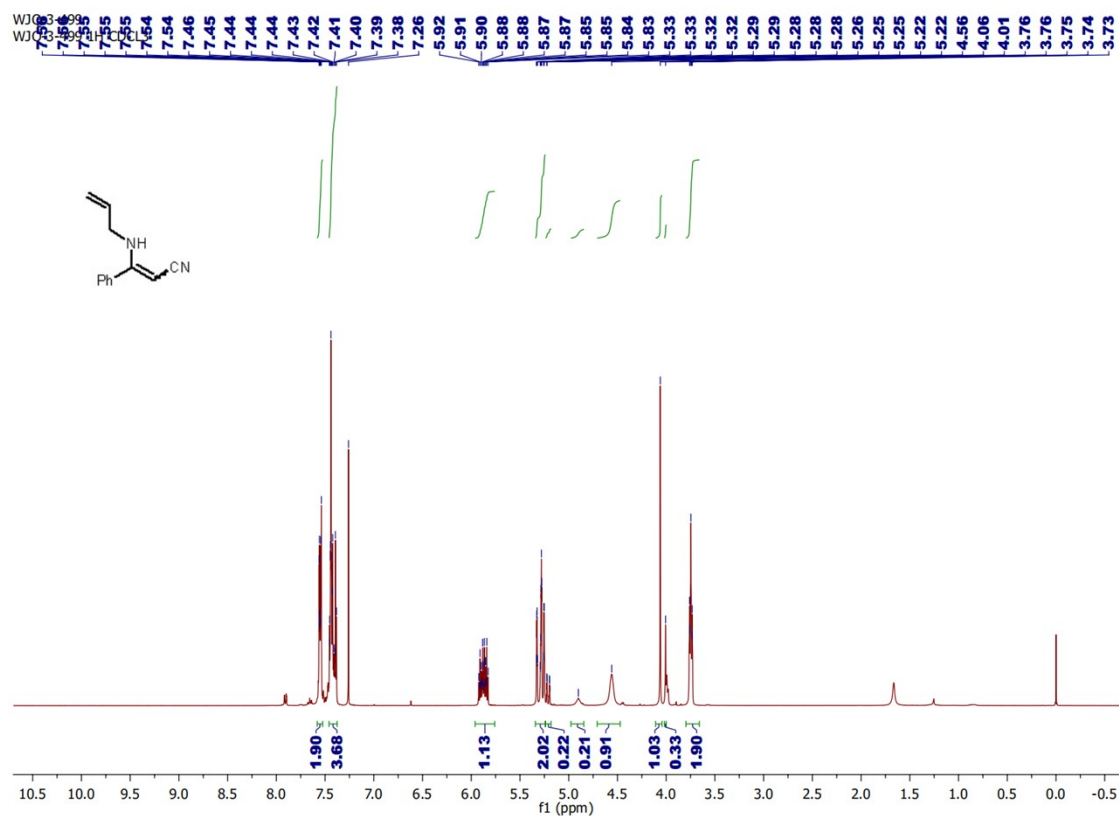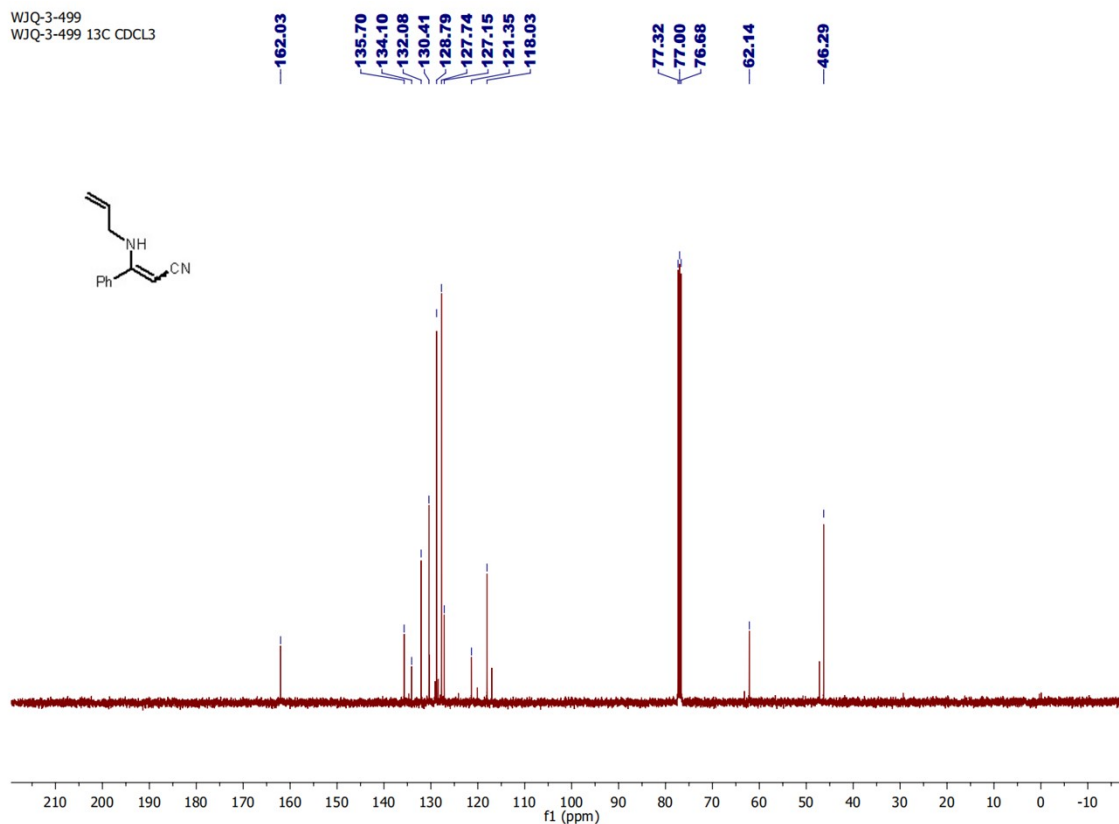

*methyl 4-bromo-3-(bromomethyl)-5-phenyl-3,4-dihydro-2H-pyrrole-4-carboxylate (2a)*

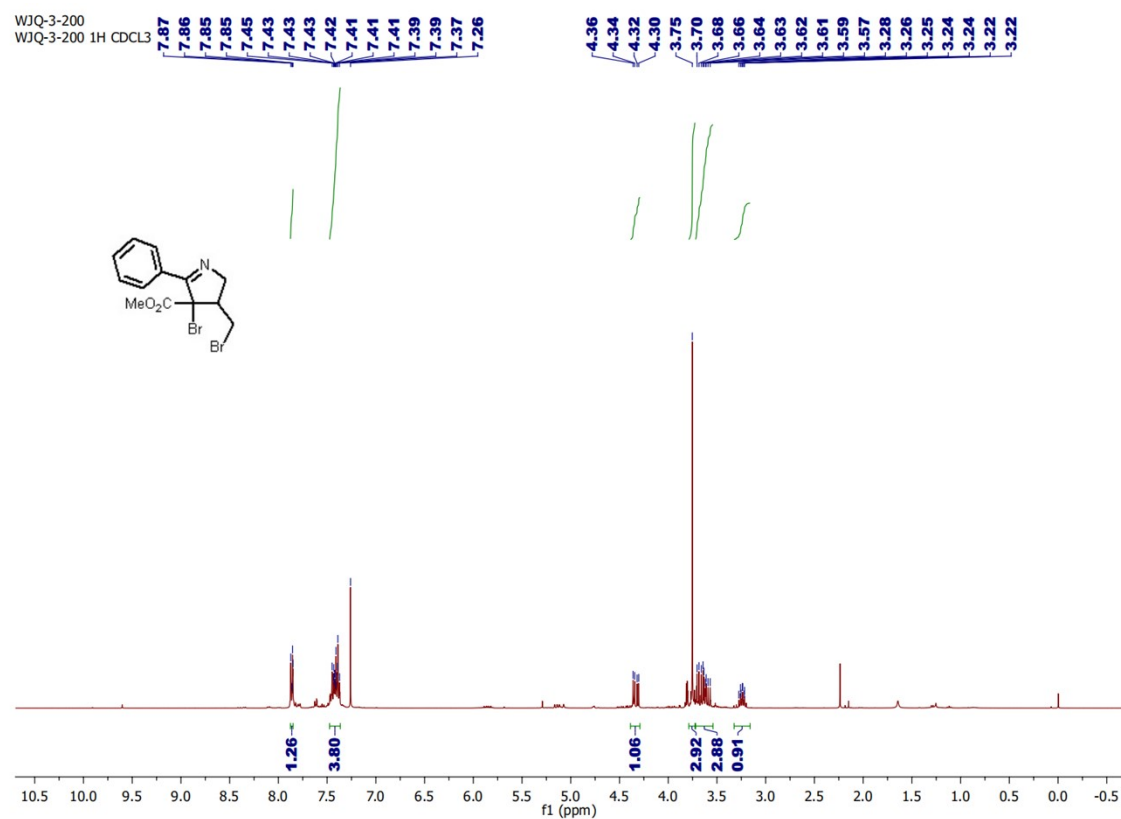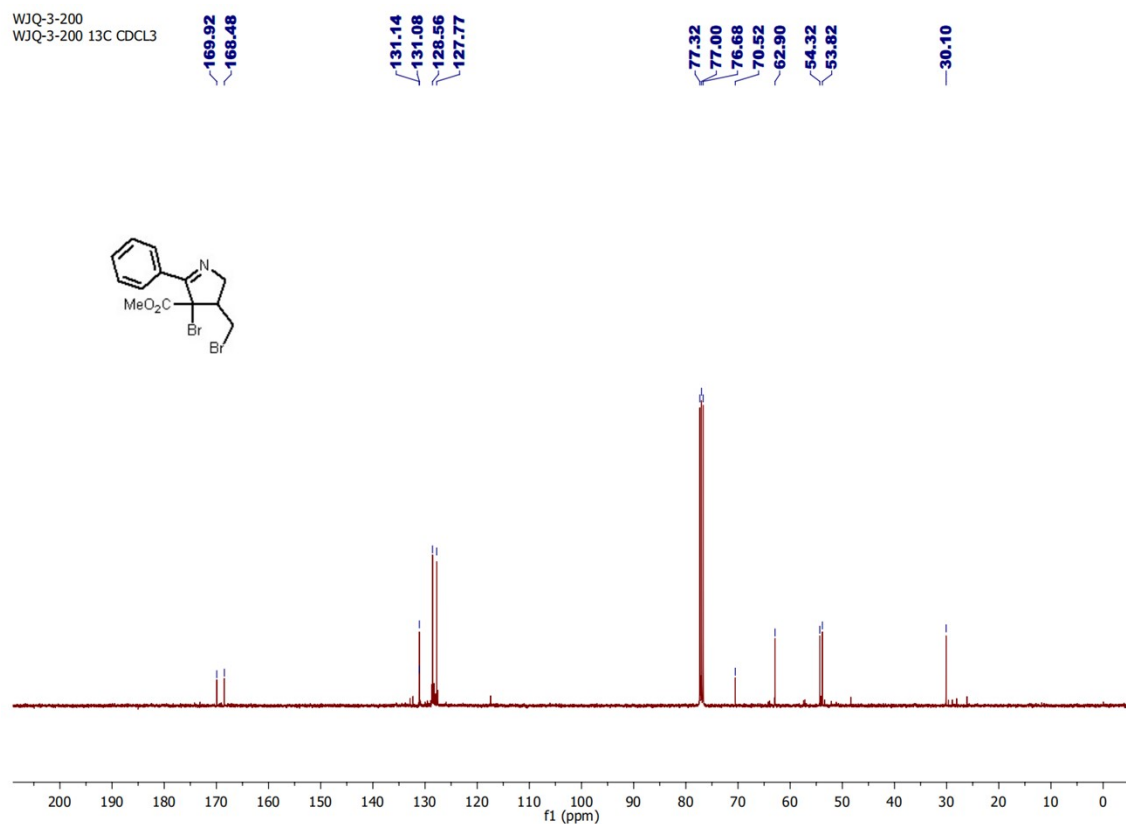

*methyl 4-bromo-3-(bromomethyl)-5-(p-tolyl)-3,4-dihydro-2H-pyrrole-4-carboxylate (2b)*

WJQ-J-678  
WJQ-J-678 1H CDCL3

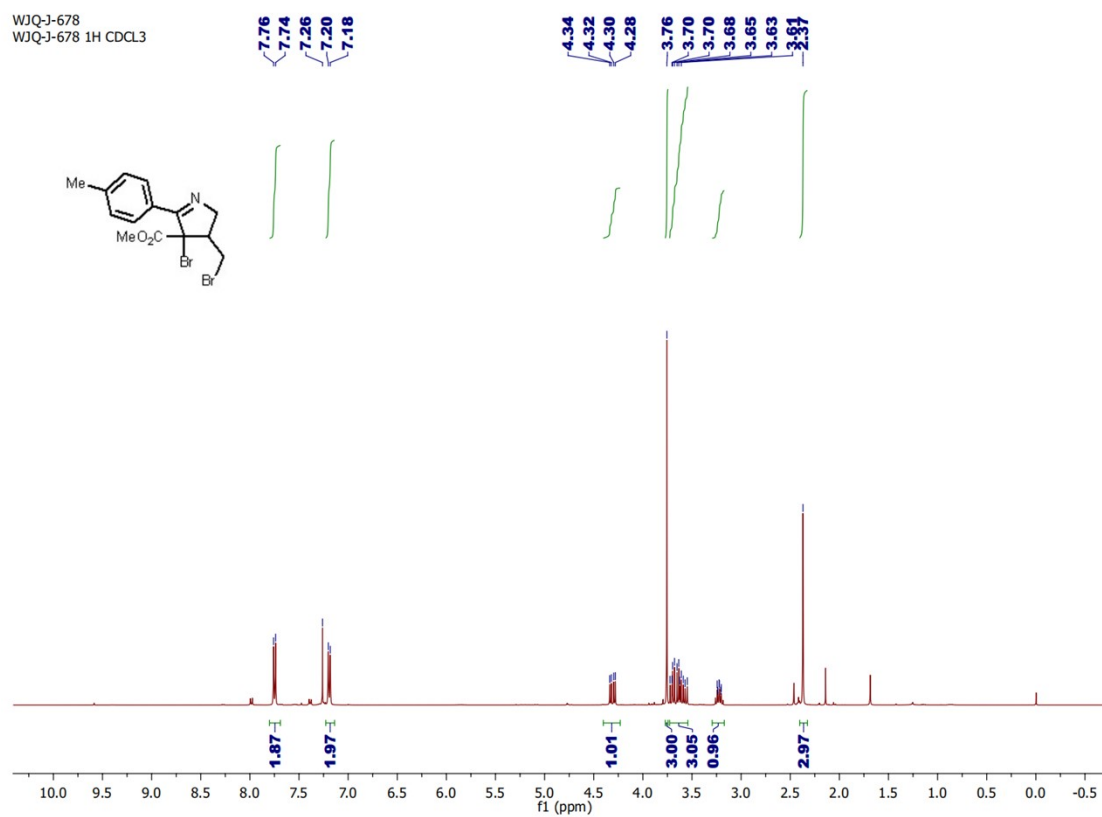

WJQ-J-678  
WJQ-J-678 13C CDCL3

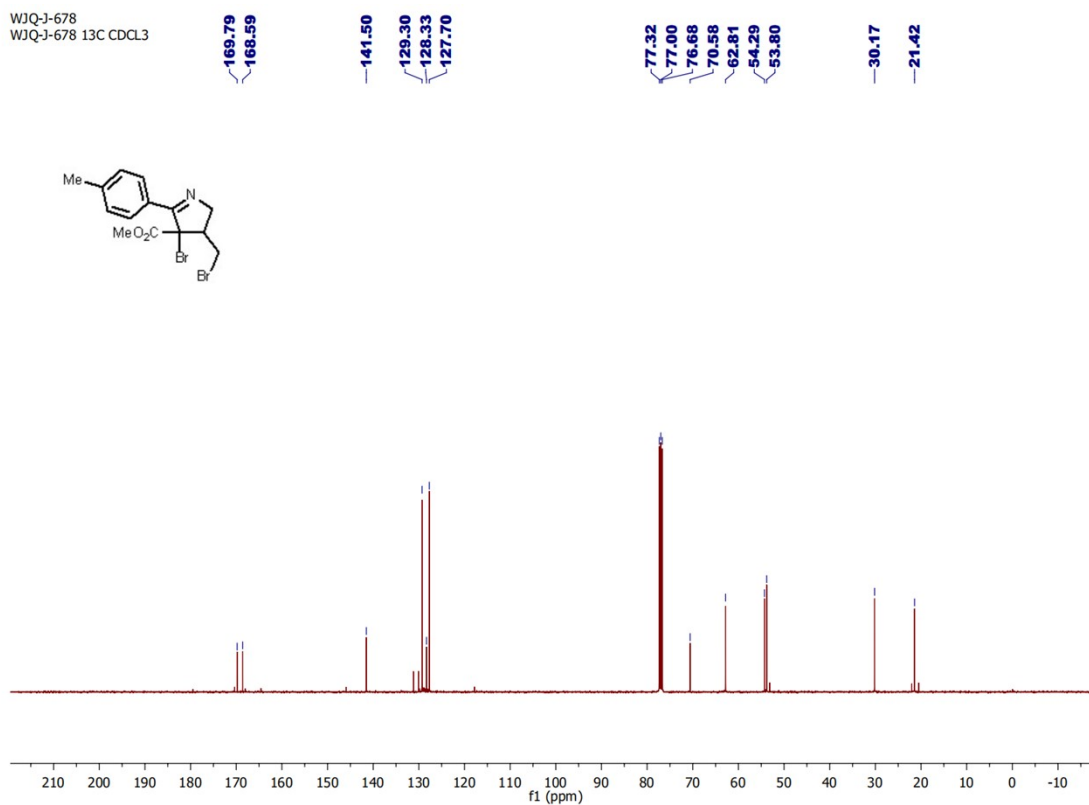

*methyl 4-bromo-3-(bromomethyl)-5-(4-methoxyphenyl)-3,4-dihydro-2H-pyrrole-4-carboxylate*  
(2c)

WJQ-3-681  
WJQ-3-681 1H CDCL<sub>3</sub>

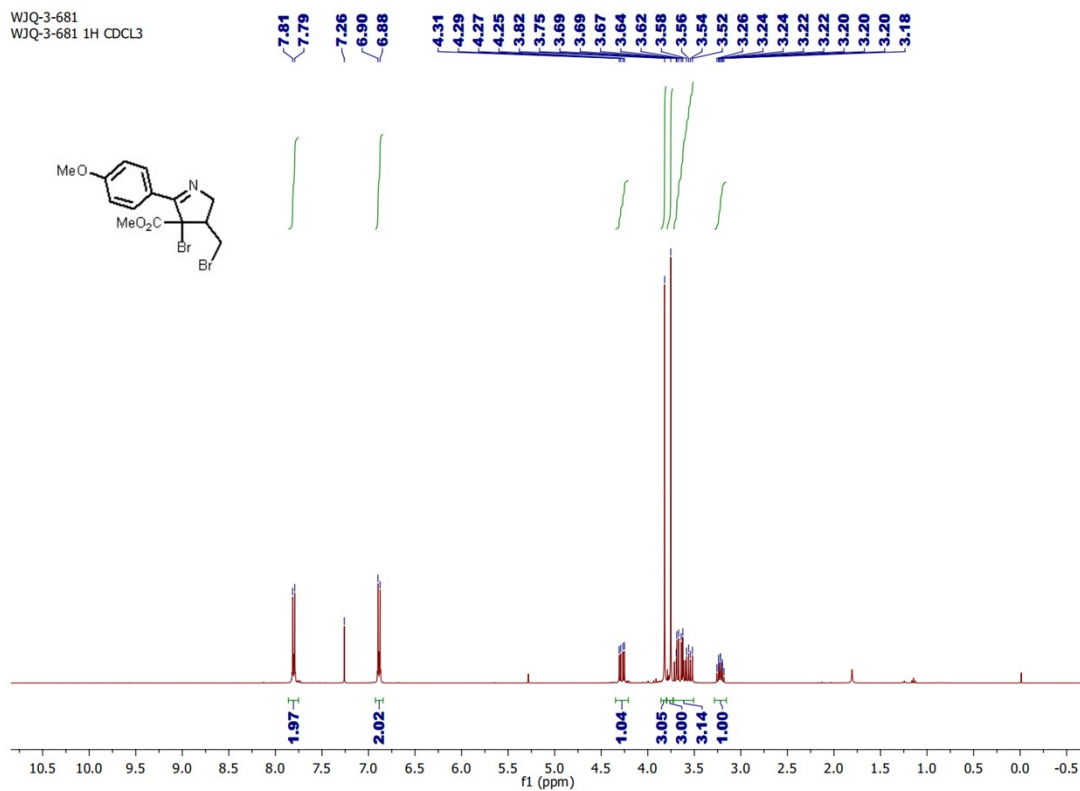

WJQ-3-681  
WJQ-3-681 13C CDCL<sub>3</sub>

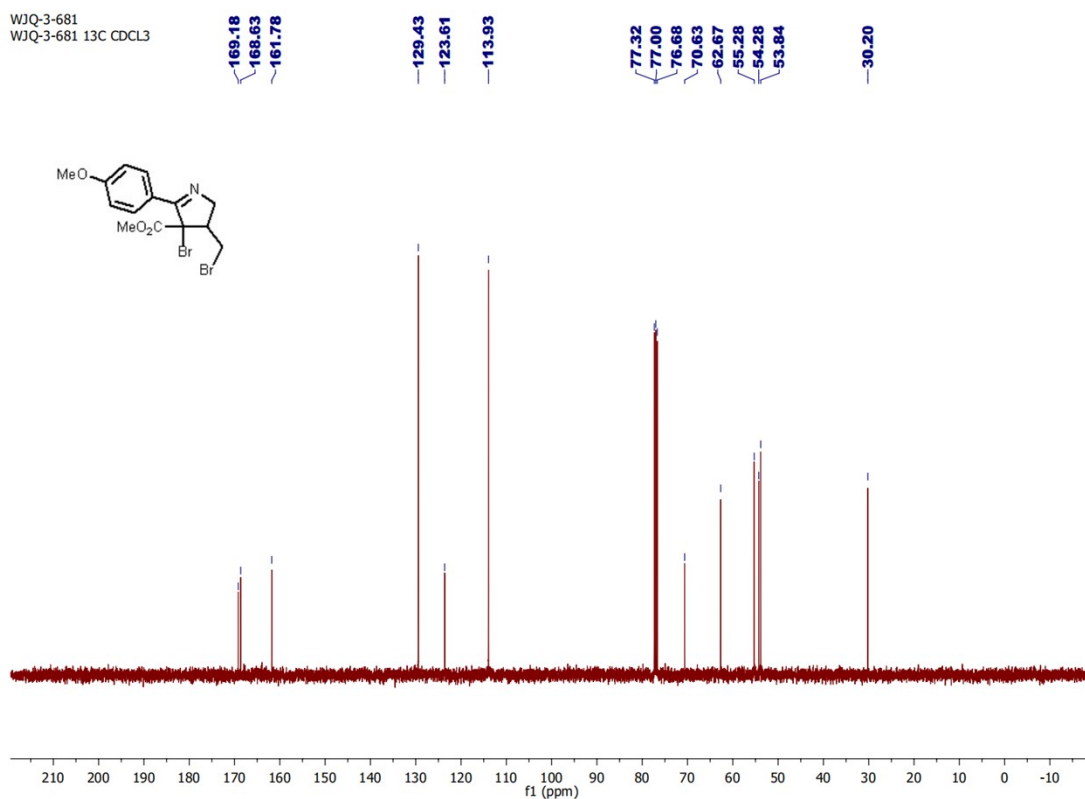

*methyl 4-bromo-3-(bromomethyl)-5-(3-methoxyphenyl)-3,4-dihydro-2H-pyrrole-4-carboxylate*  
(2d)

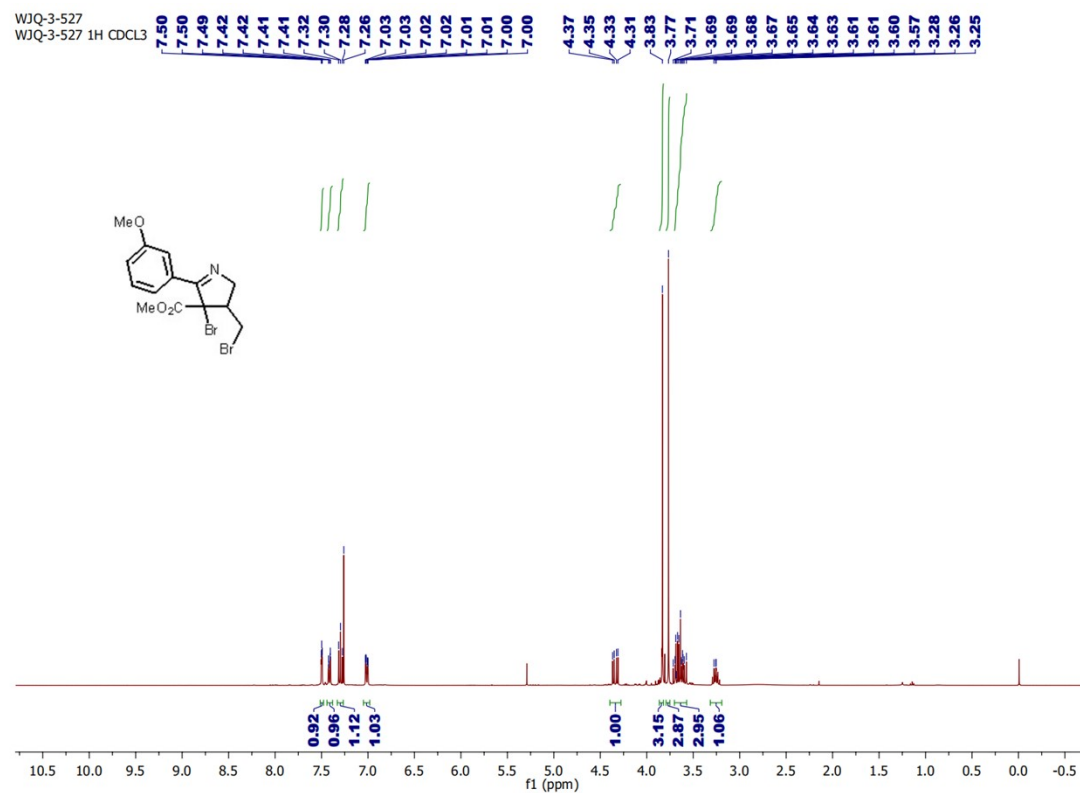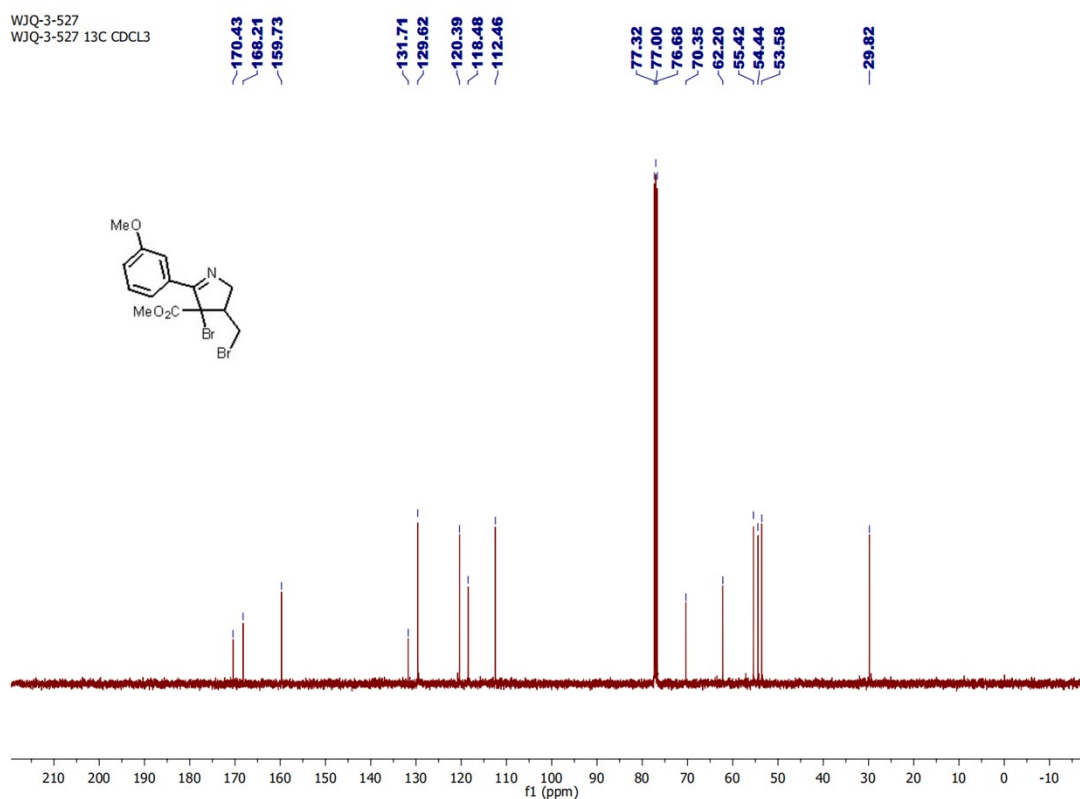

*Methyl 4-bromo-3-(bromomethyl)-5-(3,4-dimethoxyphenyl)-3,4-dihydro-2H-pyrrole-4-carboxylate (2e)*

WJQ-3-685  
WJQ-3-685 1H CDCl3

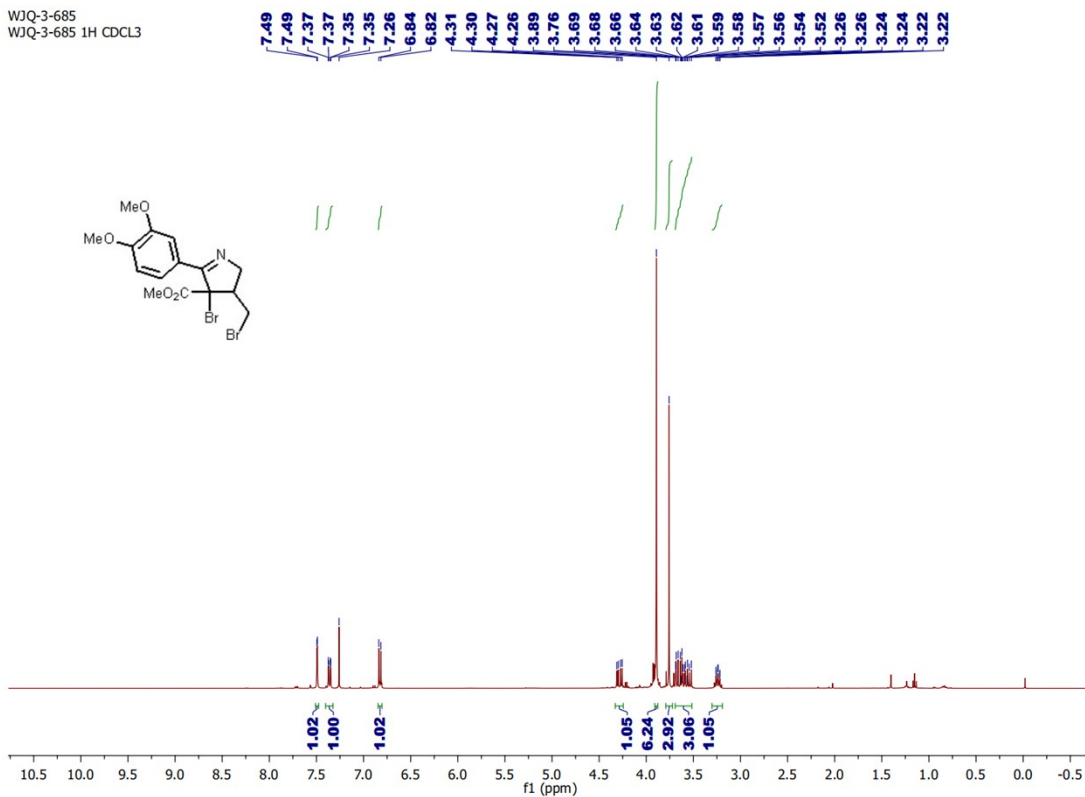

WJQ-3-685  
WJQ-3-685 13C CDCl3

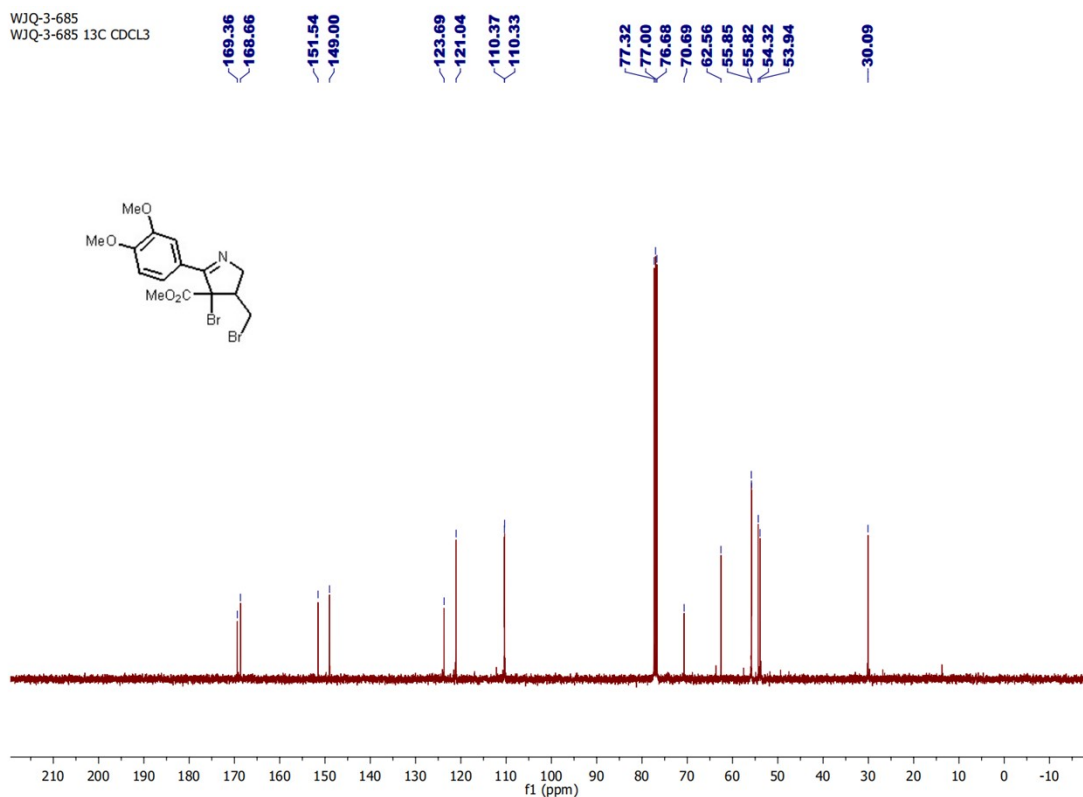

WJQ-3-708  
WJQ-3-708 1H CDCL<sub>3</sub>

8.00  
7.98  
7.66  
7.64  
7.26

4.40  
4.39  
4.36  
4.34  
3.77  
3.74  
3.73  
3.71  
3.70  
3.68  
3.66  
3.64  
3.64  
3.63  
3.62  
3.60  
3.58  
3.28  
3.27  
3.25  
3.24  
3.23  
3.22  
3.21

COC(=O)C1(Br)CC(Br)N1C2=CC=C(C(F)(F)F)C=C2

1.85  
2.00  
1.00  
2.80  
2.95  
1.00

f1 (ppm)

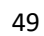

*methyl 4-bromo-3-(bromomethyl)-5-(4-fluorophenyl)-3,4-dihydro-2H-pyrrole-4-carboxylate (2g)*

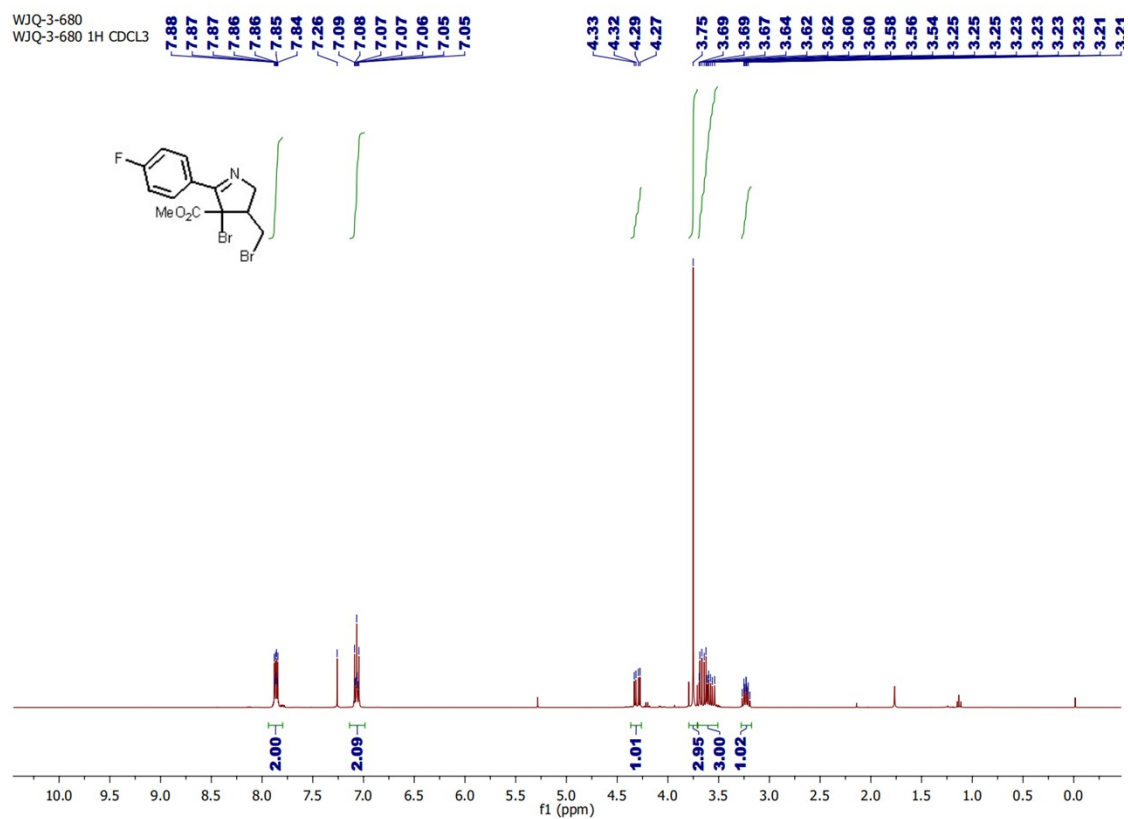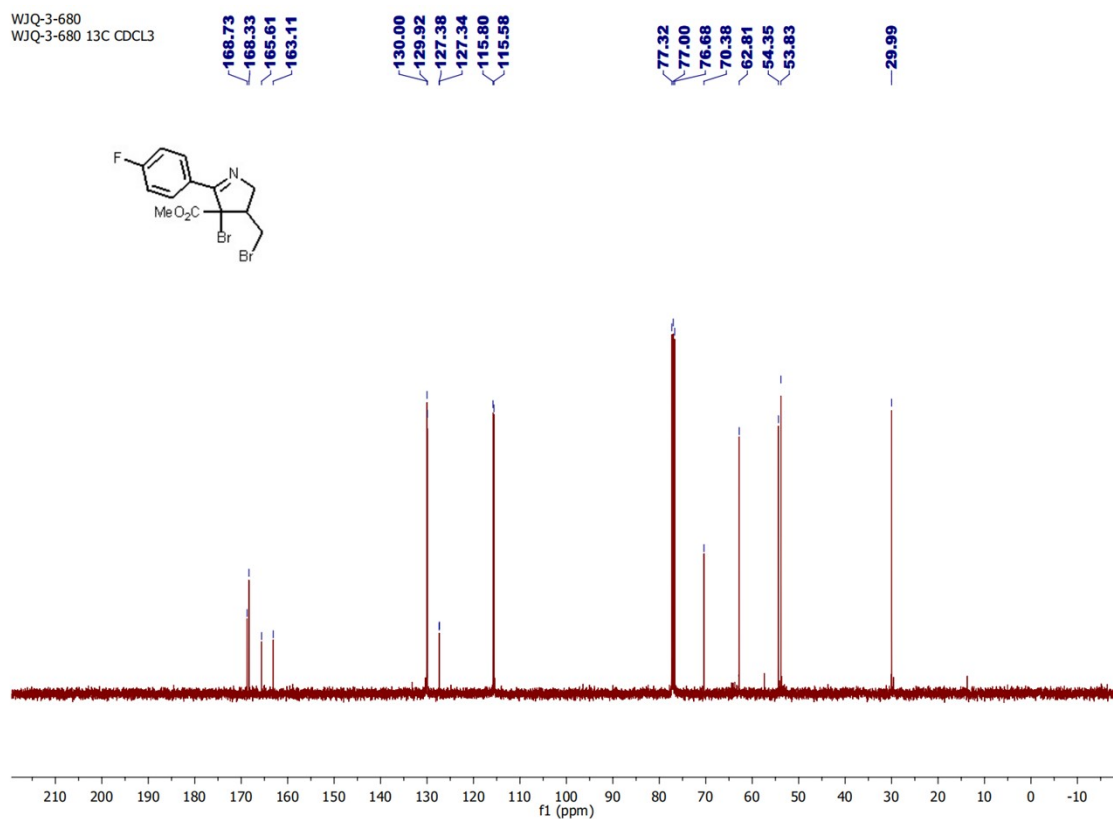

*methyl 4-bromo-3-(bromomethyl)-5-(4-chlorophenyl)-3,4-dihydro-2H-pyrrole-4-carboxylate (2h)*

WJQ-J-677  
WJQ-J-677 1H CDCL3

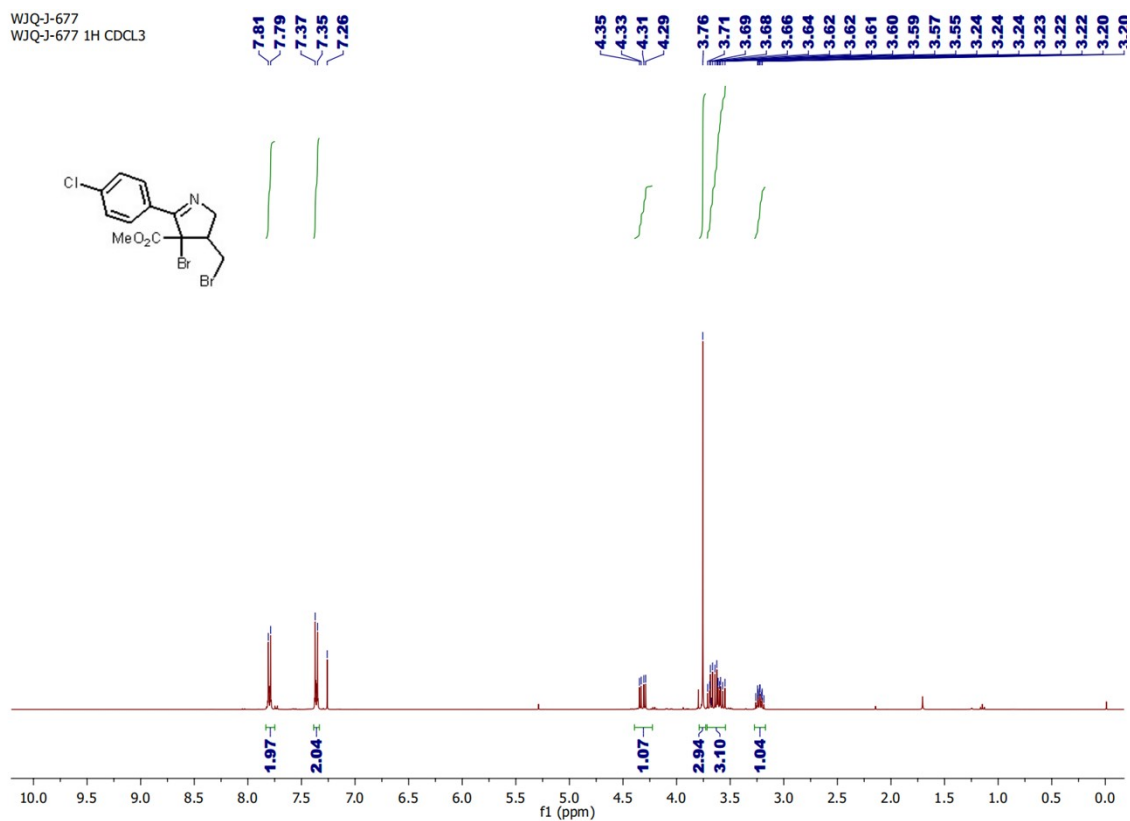

WJQ-J-677  
WJQ-J-677 13C CDCL3

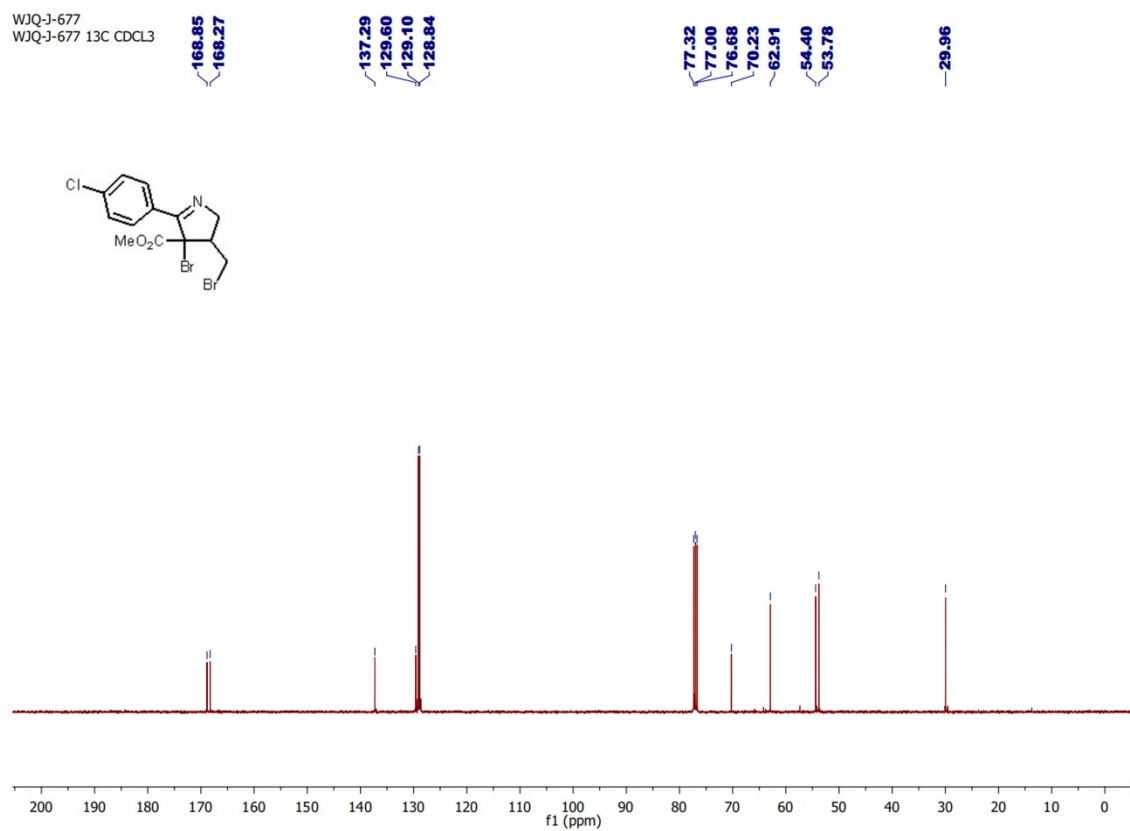

*methyl 4-bromo-3-(bromomethyl)-5-(thiophen-2-yl)-3,4-dihydro-2H-pyrrole-4-carboxylate (2j)*

WJQ-3-688  
WJQ-3-688 1H CDCL3

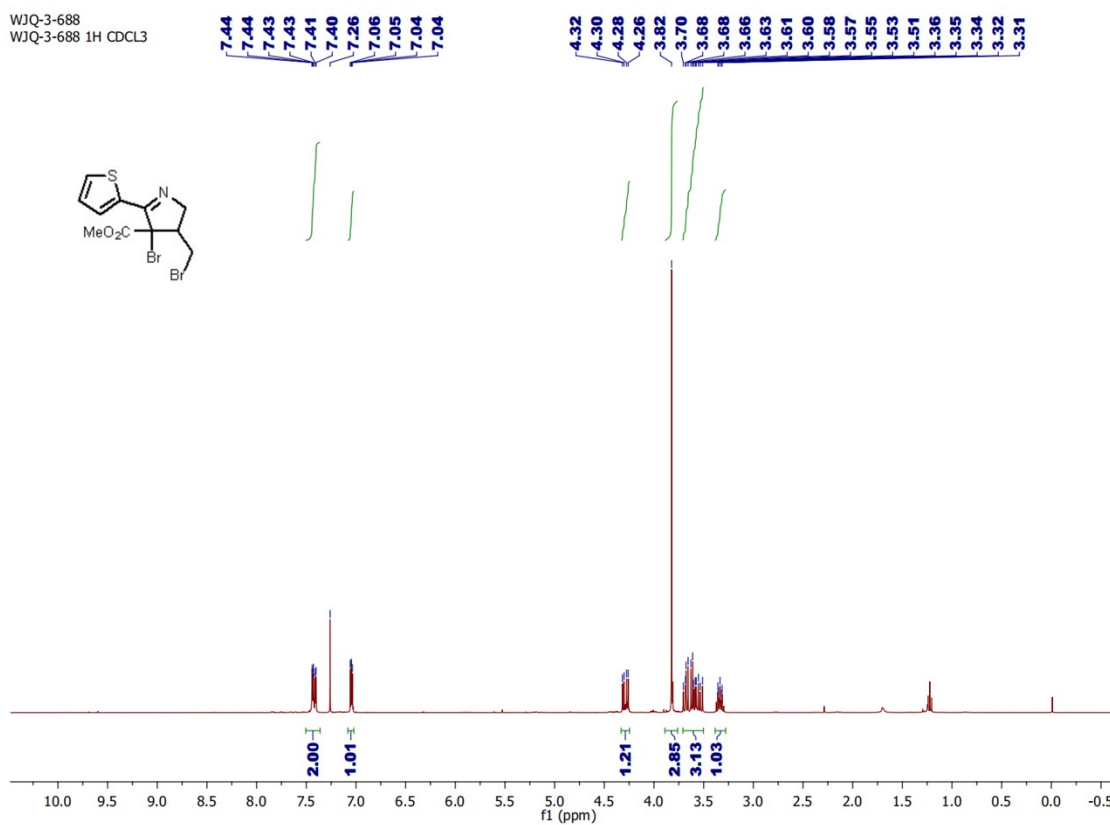

WJQ-3-688  
WJQ-3-688 13C CDCL3

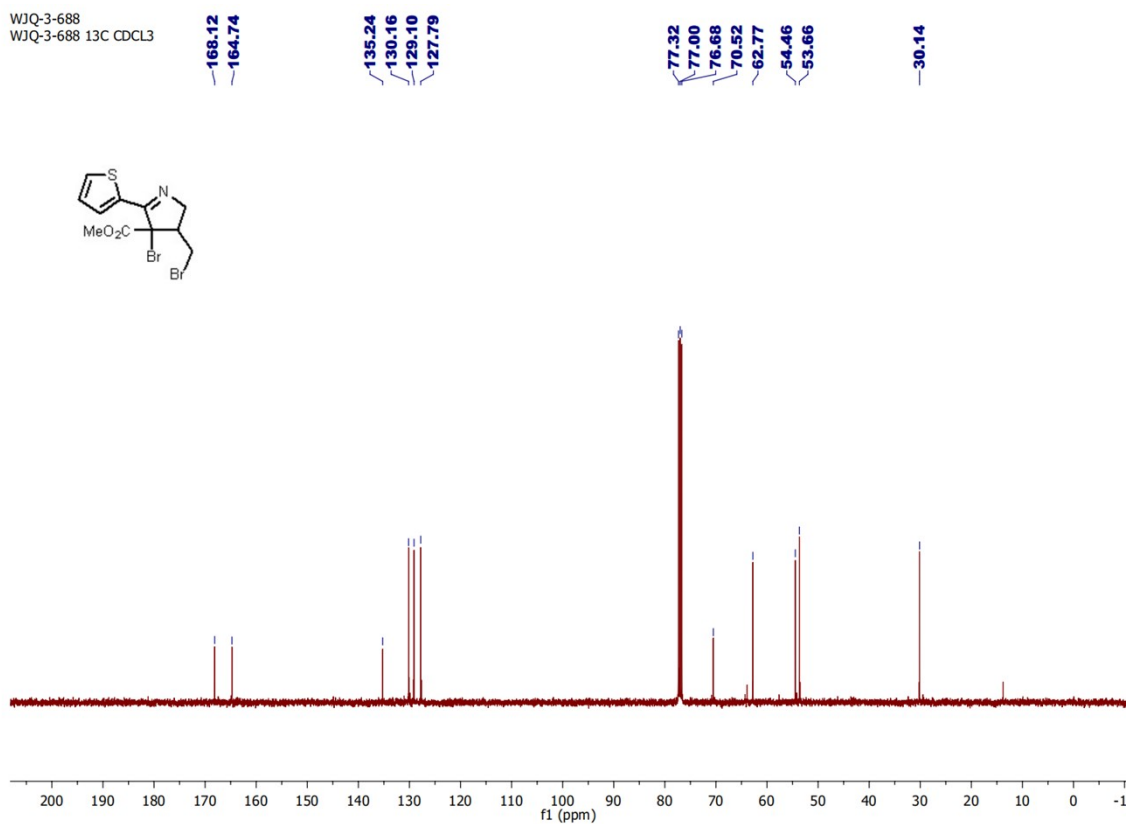

ethyl 4-bromo-3-(bromomethyl)-5-phenyl-3,4-dihydro-2H-pyrrole-4-carboxylate (**2k**)

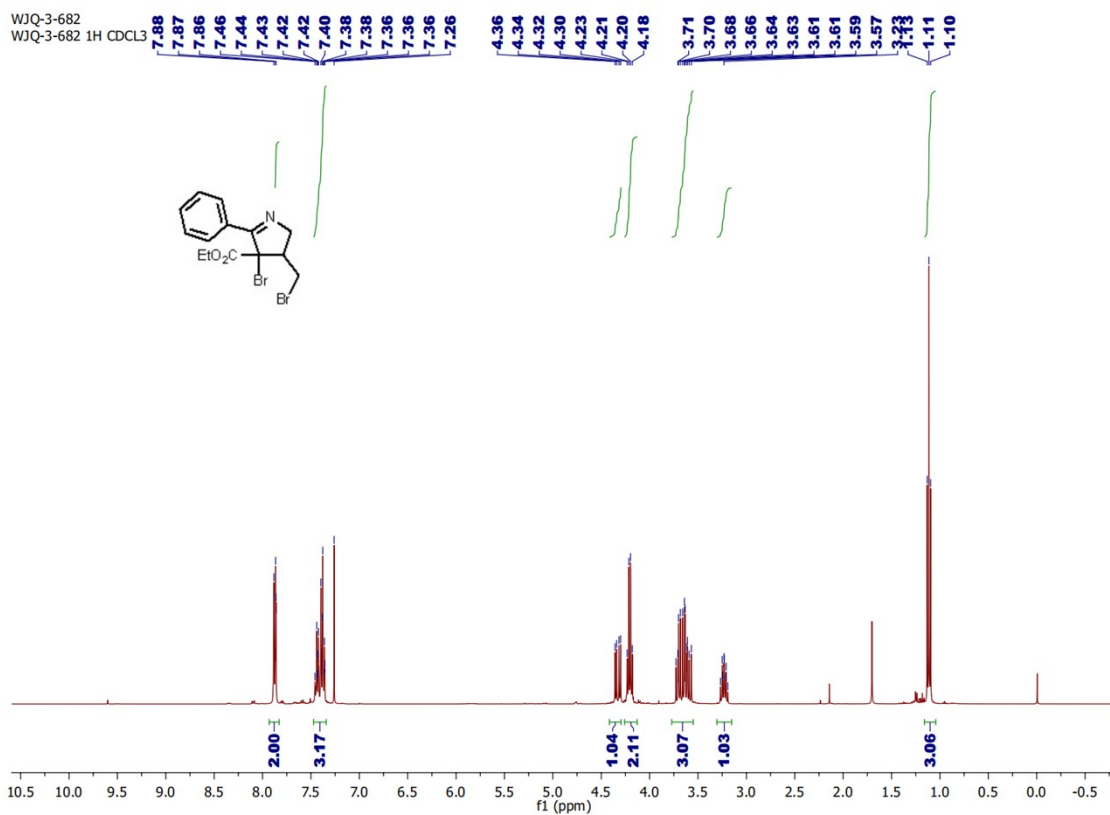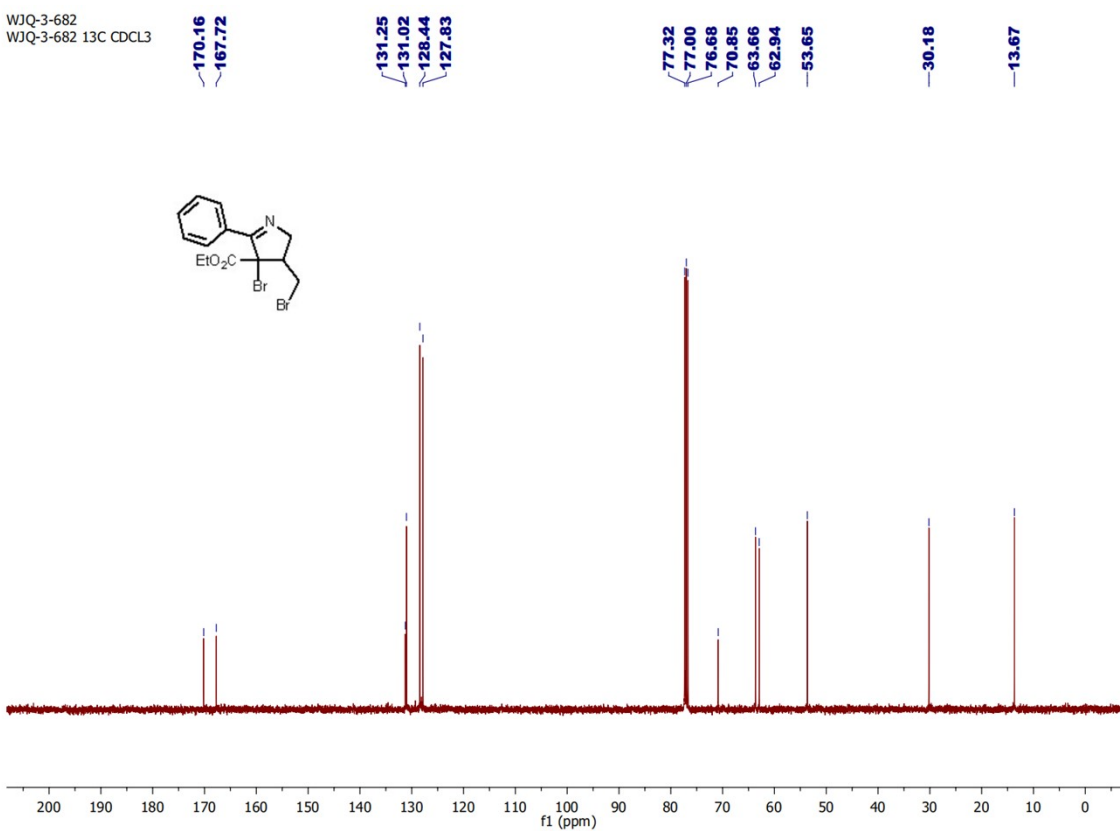

*isopropyl 4-bromo-3-(bromomethyl)-5-phenyl-3,4-dihydro-2H-pyrrole-4-carboxylate (21)*

WJQ-3-683  
WJQ-3-683 1H CDCL3

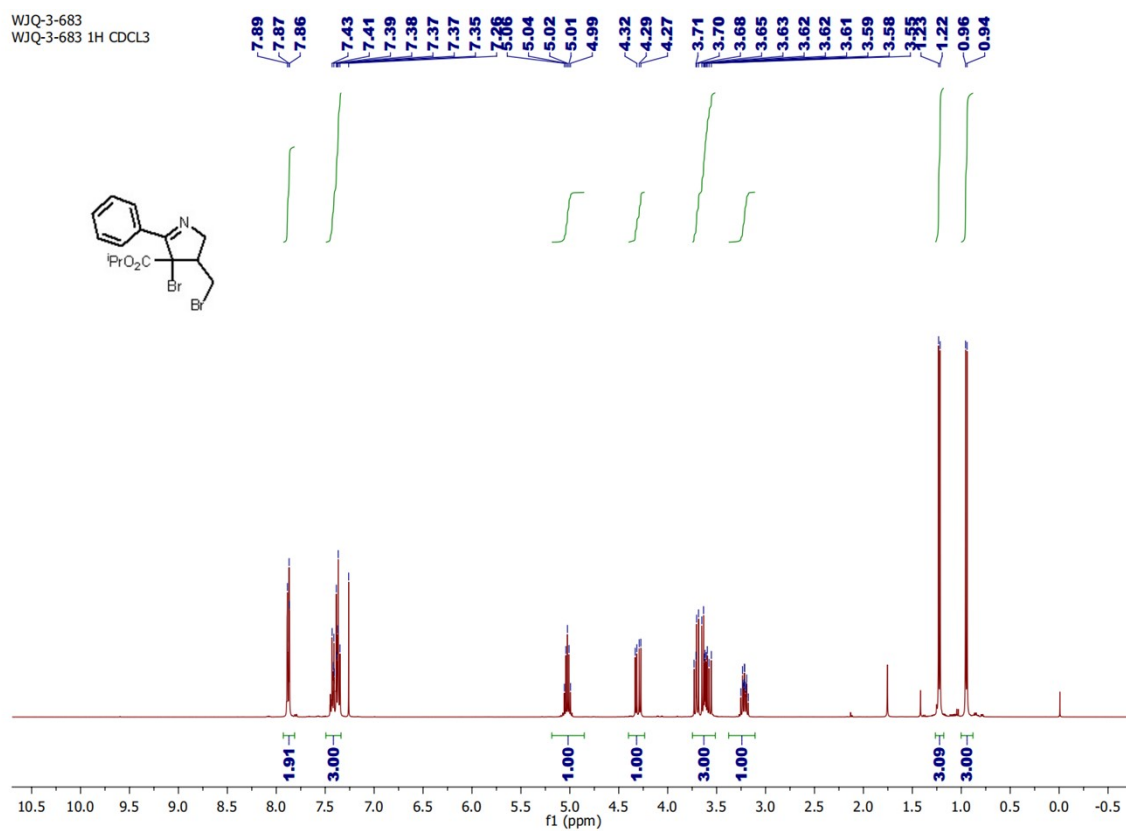

WJQ-3-683  
WJQ-3-683 13C CDCL3

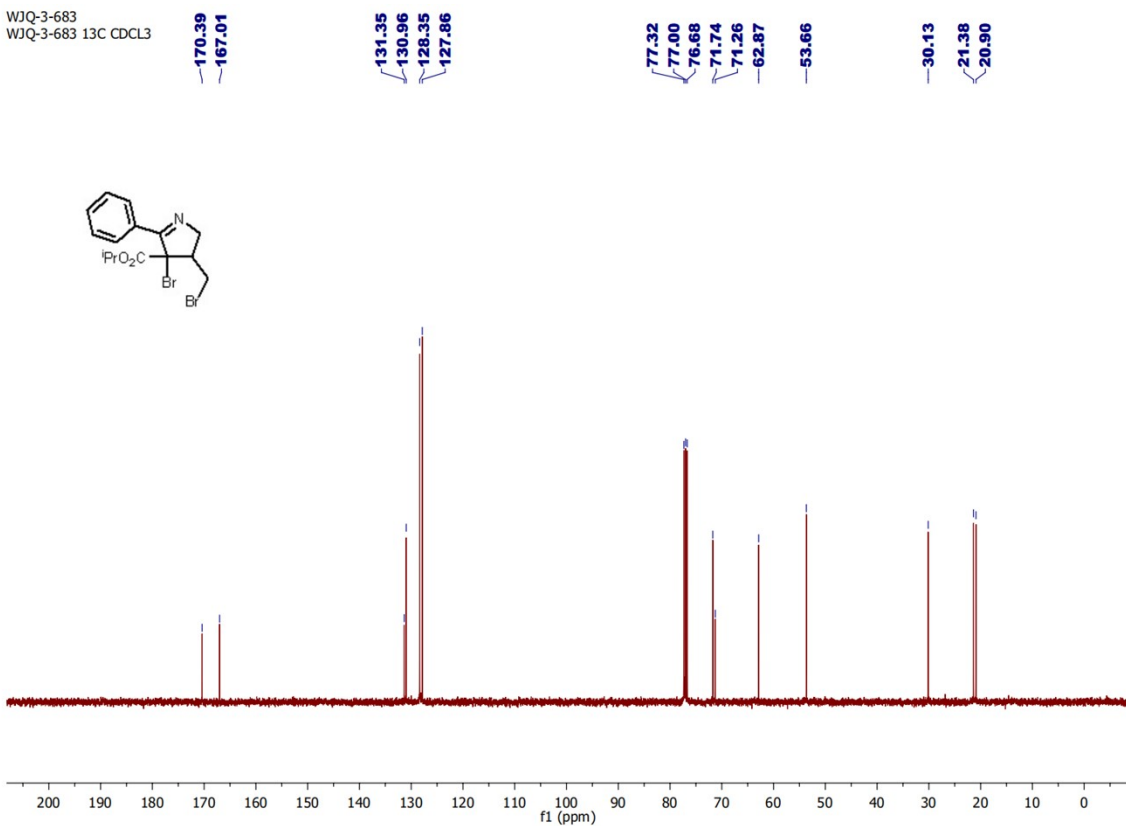

butyl 4-bromo-3-(bromomethyl)-5-phenyl-3,4-dihydro-2H-pyrrole-4-carboxylate (**2m**)

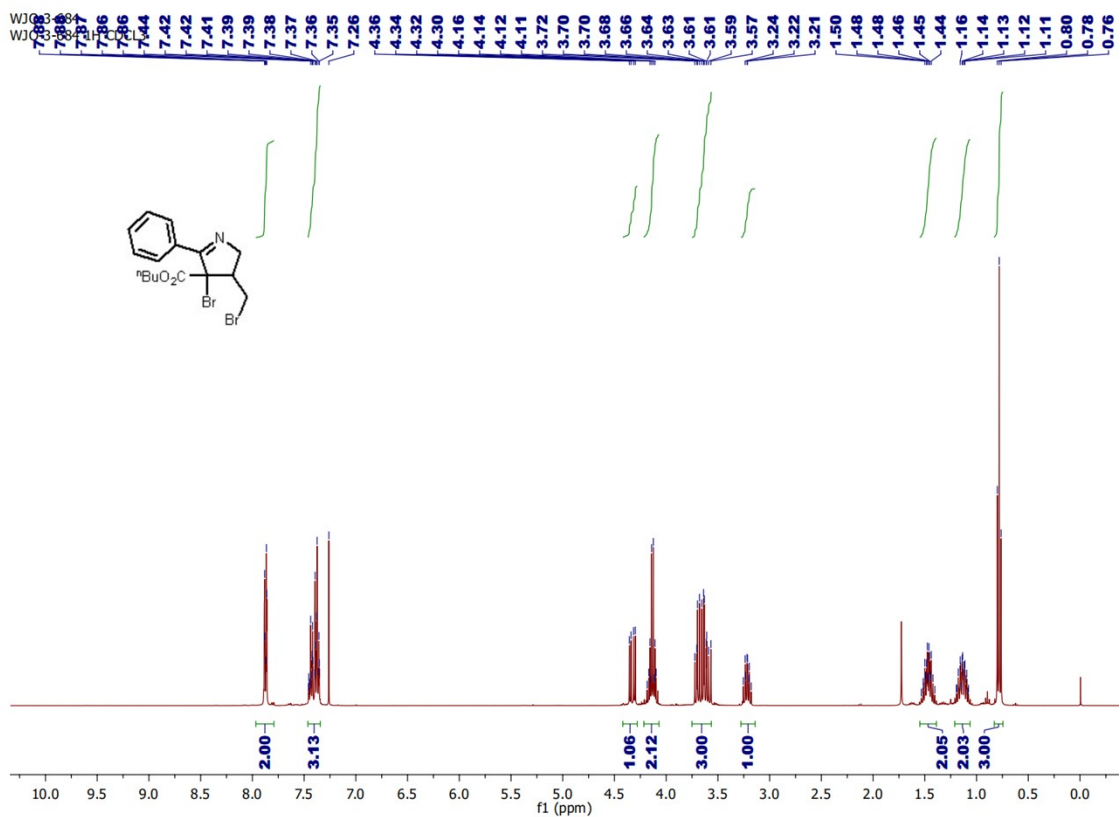

WJQ-3-684  
WJQ-3-684 <sup>13</sup>C CDCl<sub>3</sub>

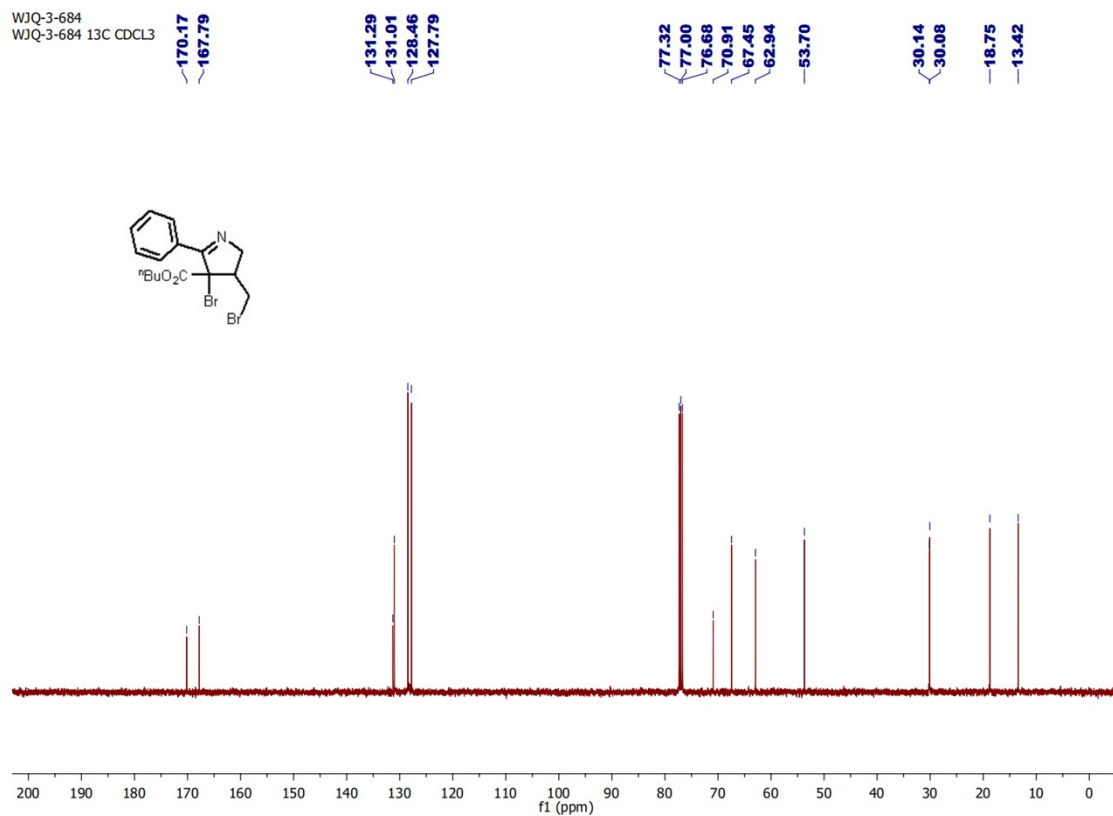

*methyl 3-(allylimino)-2,2-dibromo-3-phenylpropanoate (3a)*

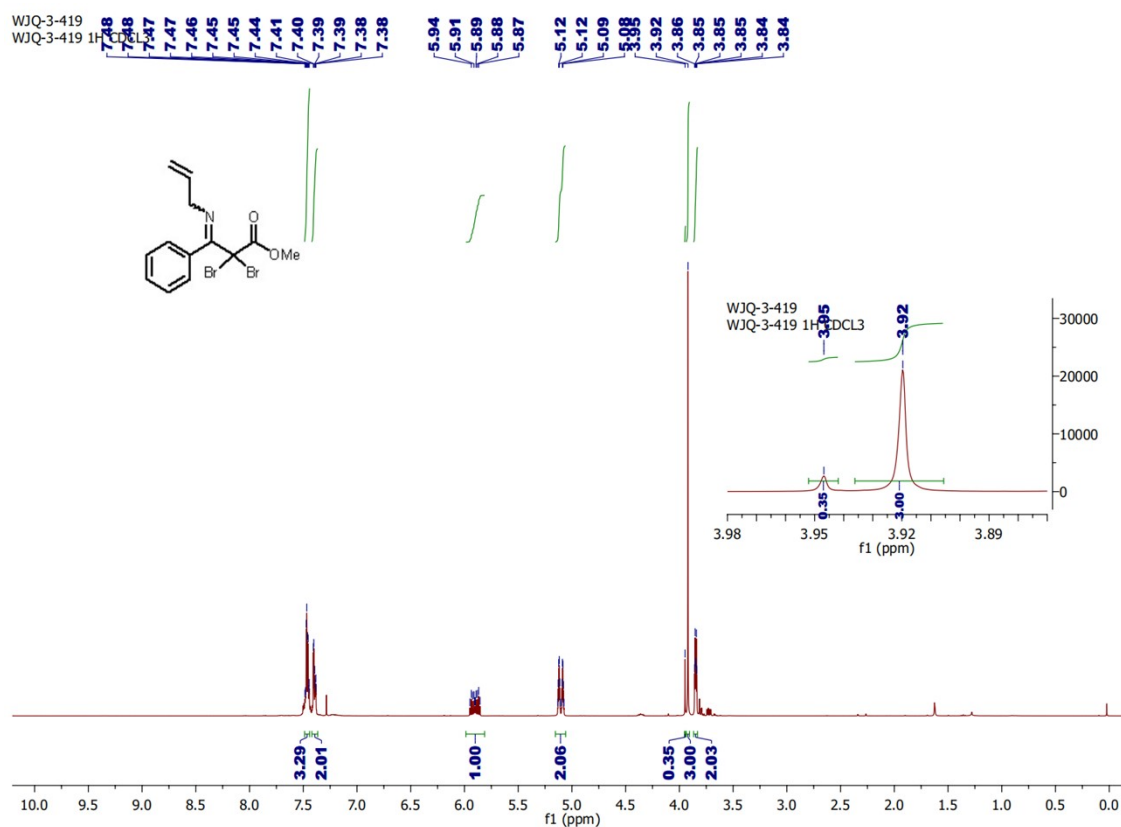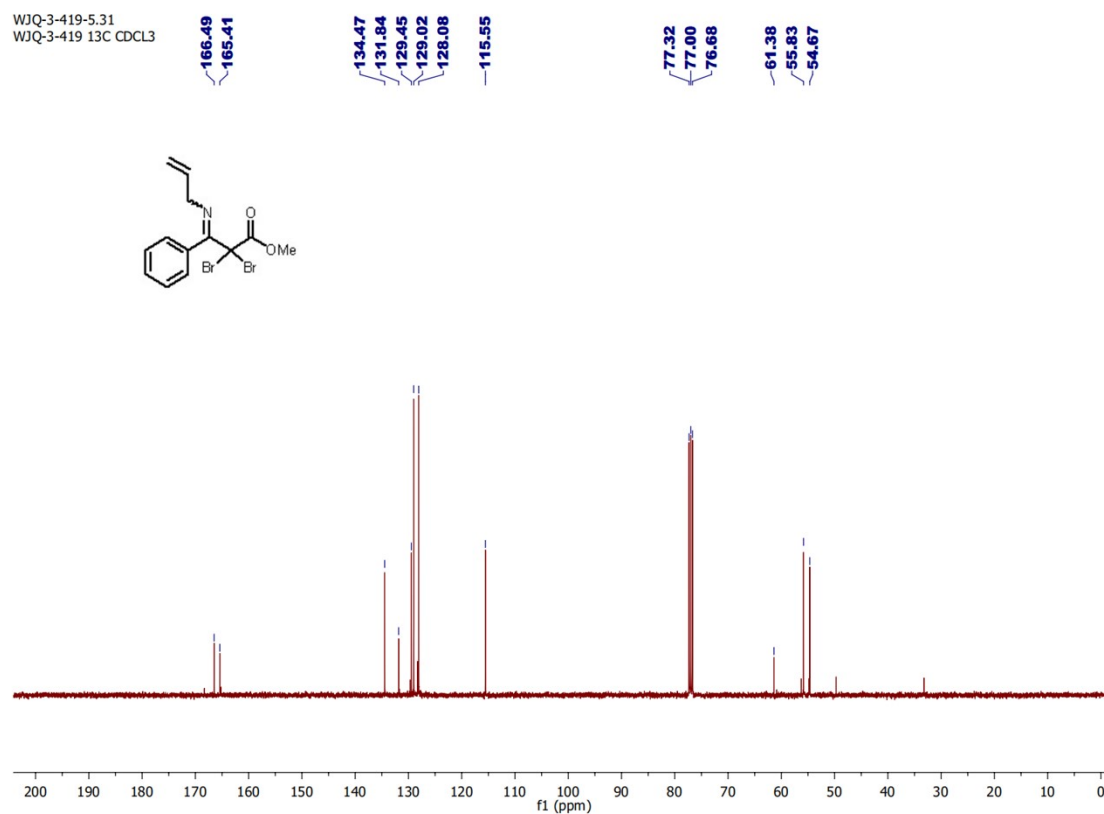

*methyl 3-(allylimino)-2,2-dibromo-3-(p-tolyl)propanoate (3b)*

WJQ-3-622  
WJQ-3-622 1H CDCL3

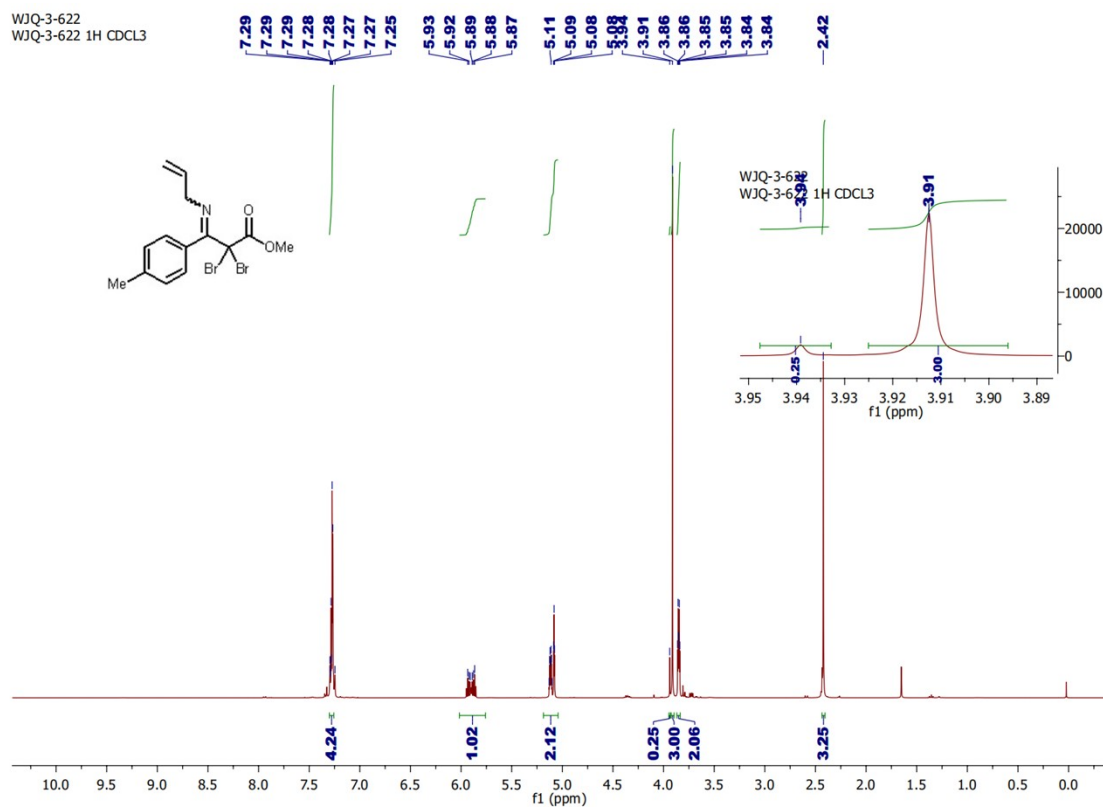

WJQ-3-622  
WJQ-3-622 13C CDCL3

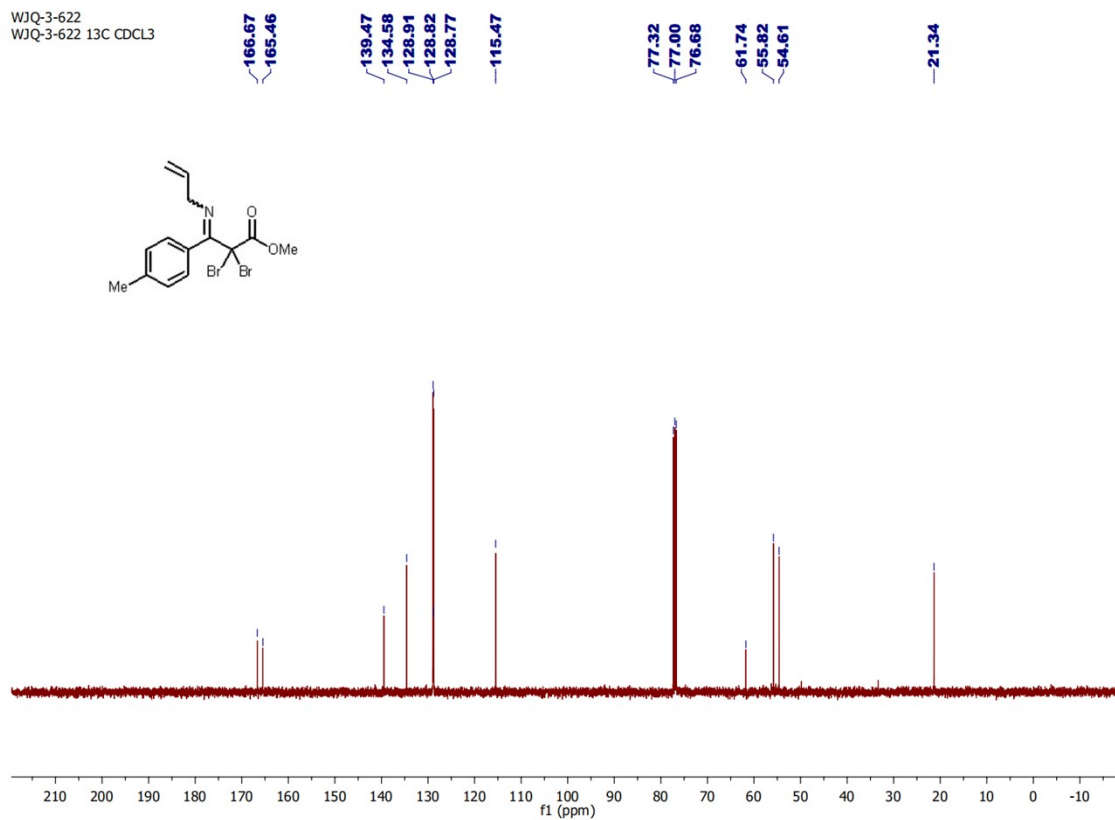

*methyl 3-(allylimino)-2,2-dibromo-3-(4-methoxyphenyl)propanoate (3c)*

WJQ-3-603  
WJQ-3-603 1H CDCl<sub>3</sub>

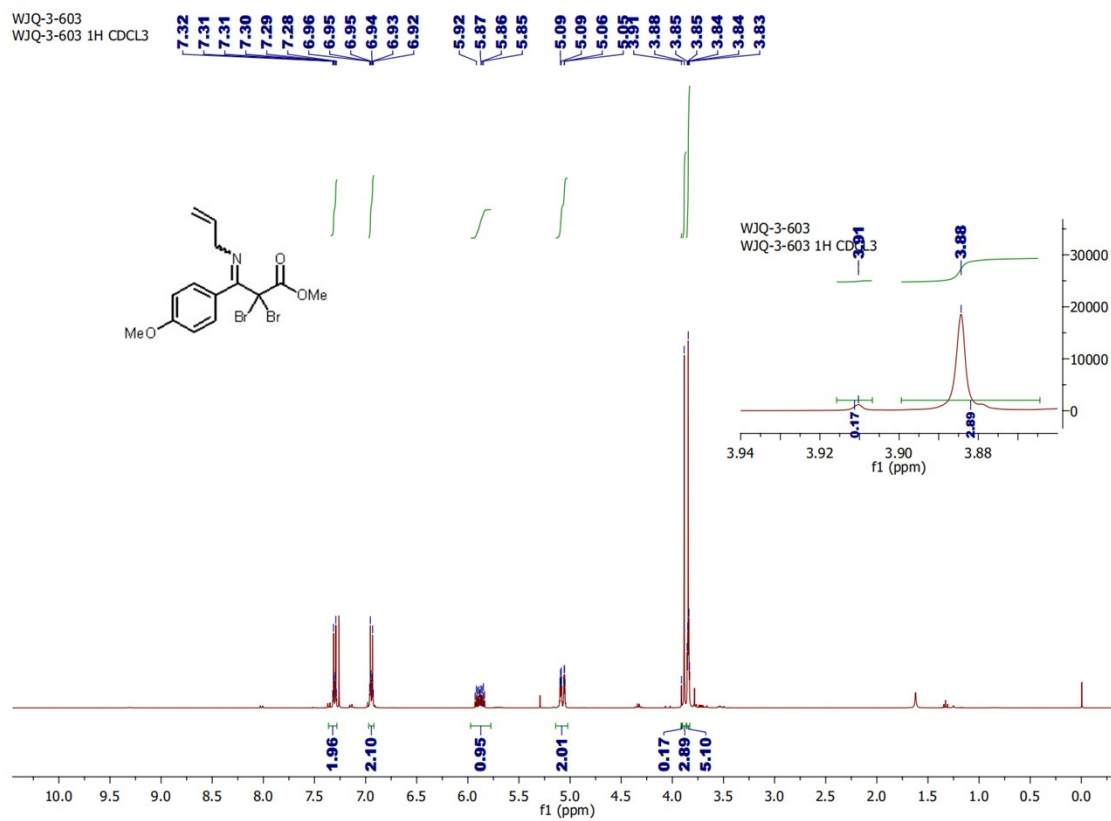

WJQ-3-603  
WJQ-3-603 13C CDCl<sub>3</sub>

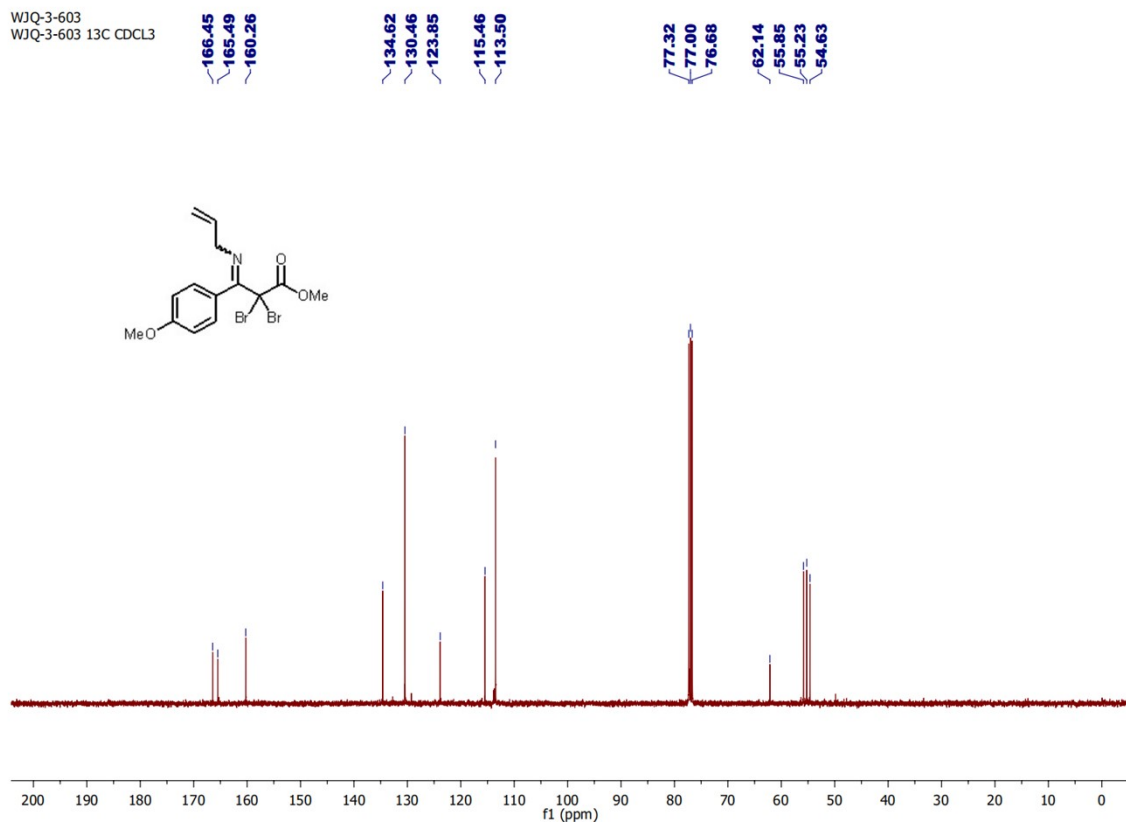

*methyl 3-(allylimino)-2,2-dibromo-3-(4-fluorophenyl)propanoate (3d)*

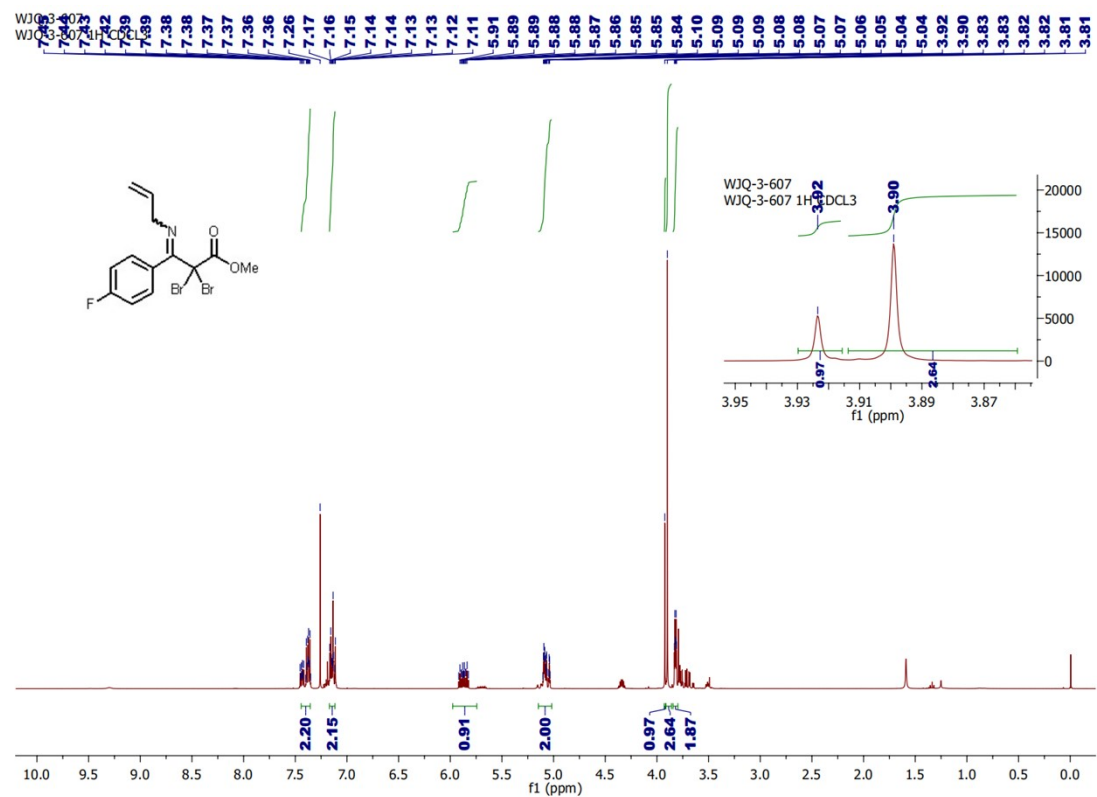

WJQ-3-607  
WJQ-3-607 13C CDCl<sub>3</sub>

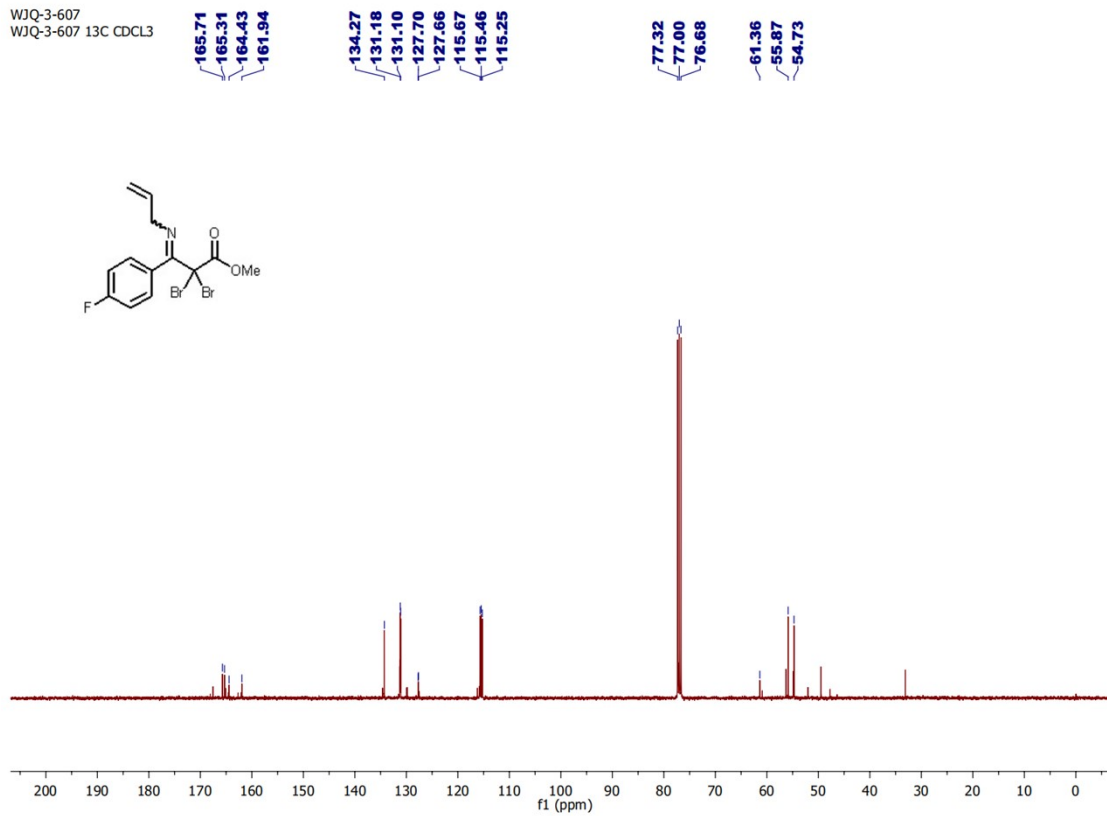

*methyl 3-(allylimino)-2,2-dibromo-3-(3-methoxyphenyl)propanoate (3e)*

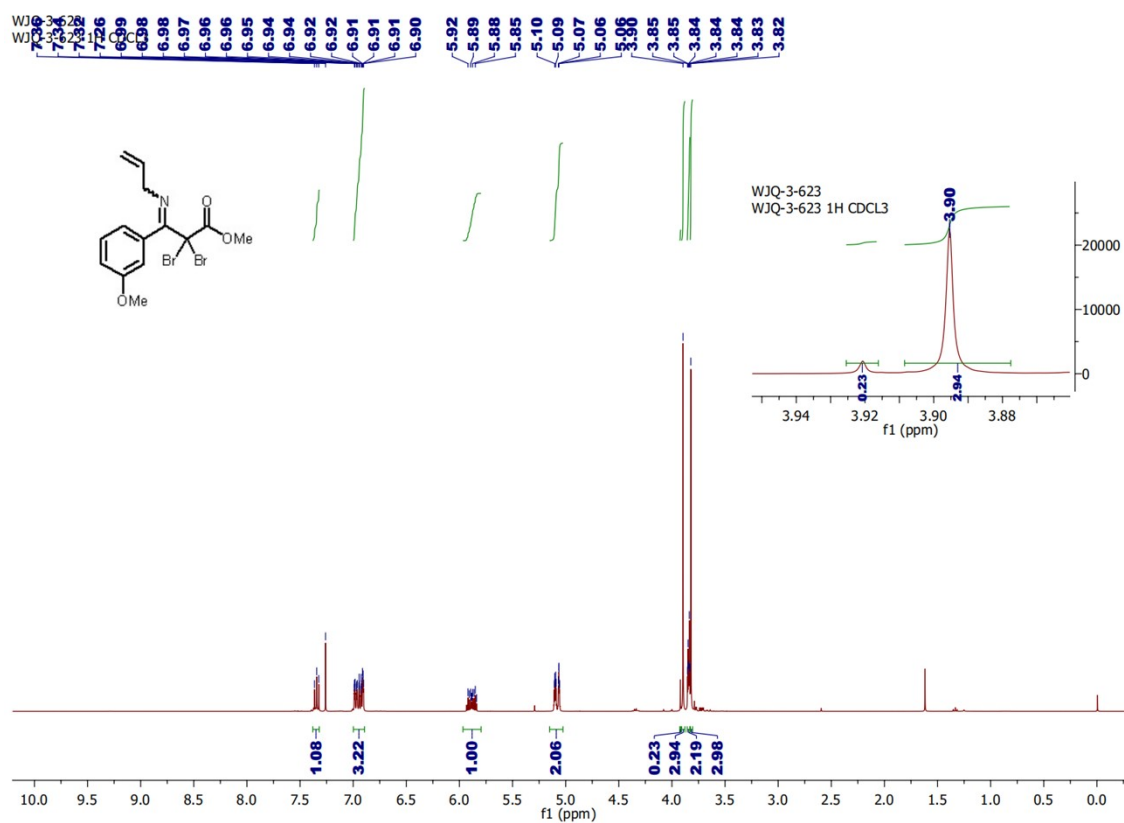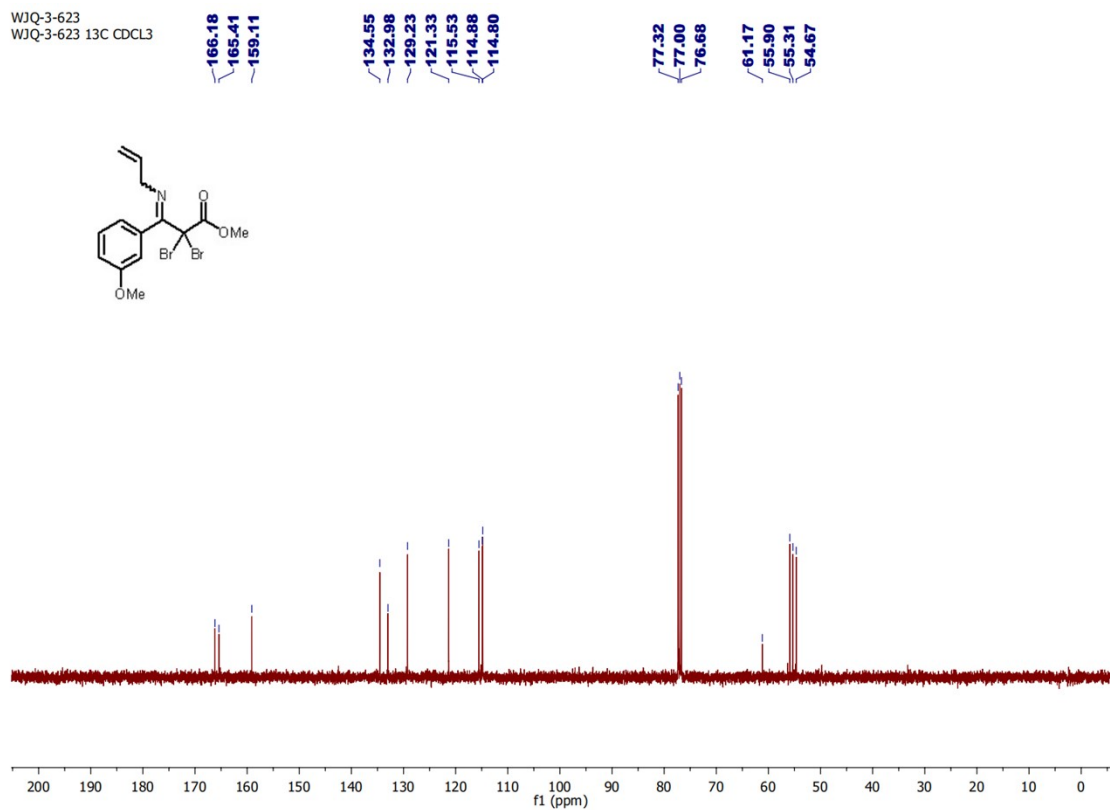

*methyl 3-(allylimino)-2,2-dibromo-3-(3,4-dimethoxyphenyl)propanoate (3f)*

WJQ-3-627  
WJQ-3-627 1H CDCL<sub>3</sub>

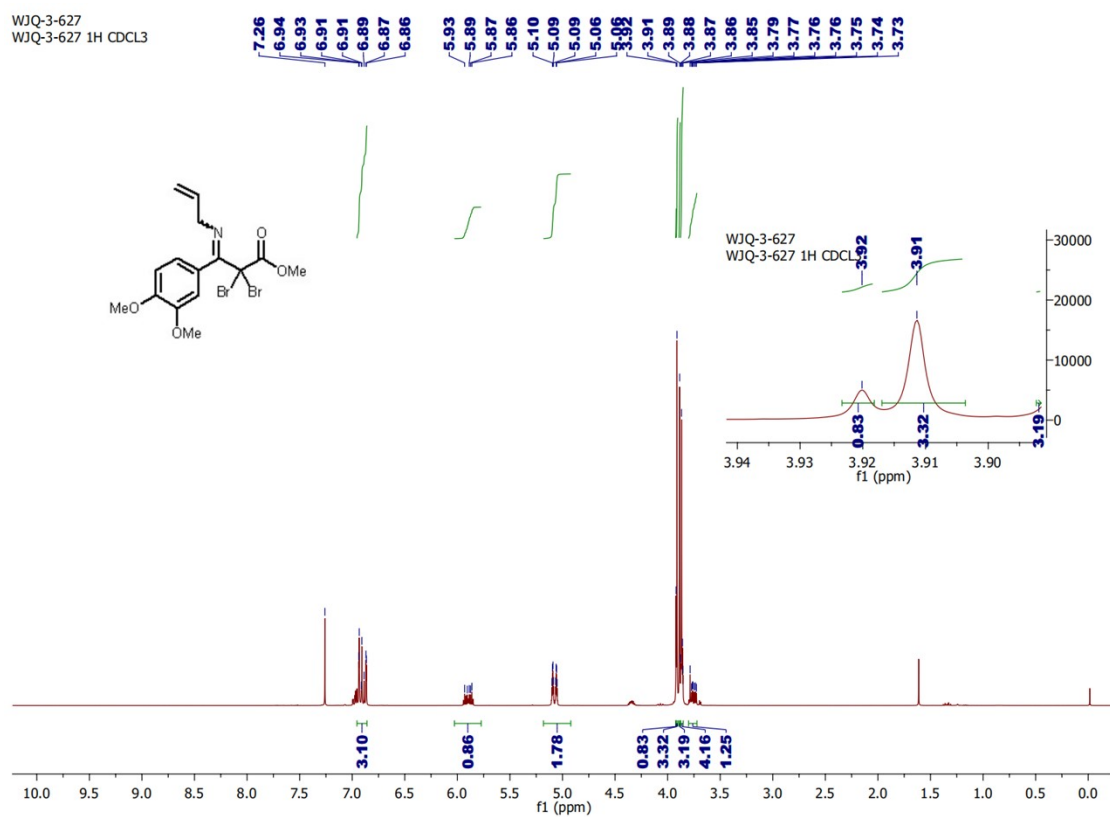

WJQ-3-627  
WJQ-3-627 13C CDCL<sub>3</sub>

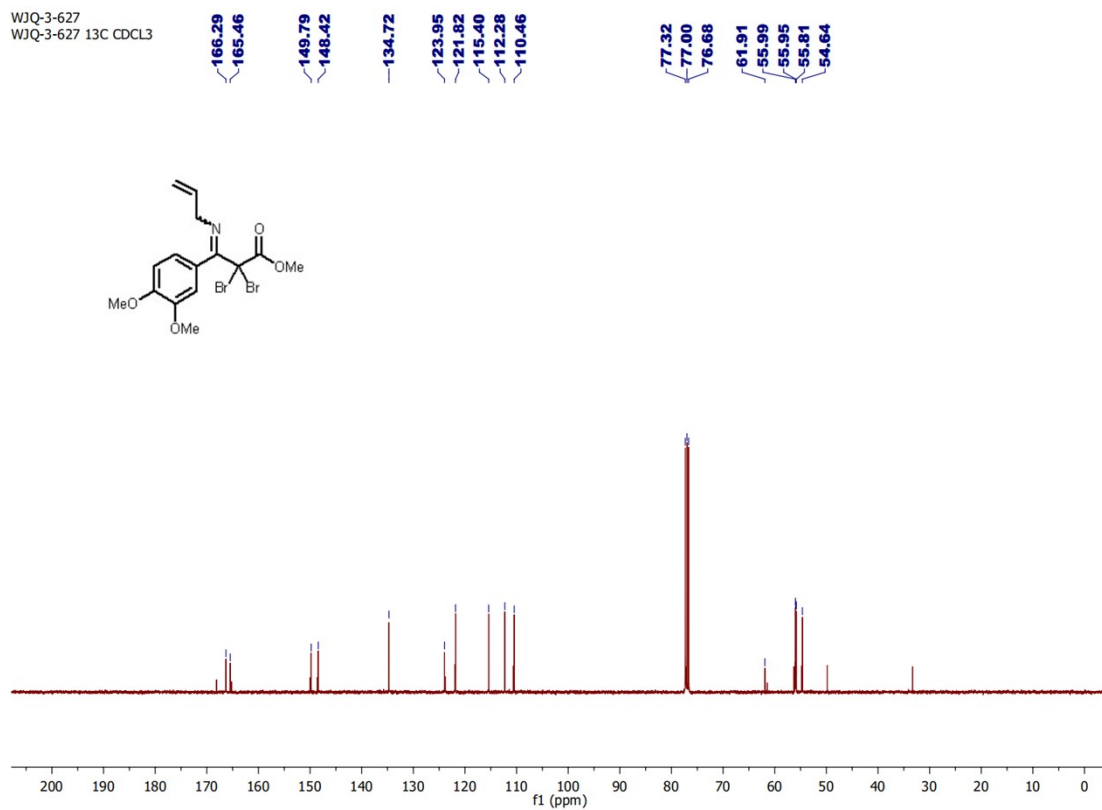

isopropyl 3-(allylimino)-2,2-dibromo-3-phenylpropanoate (**3g**)

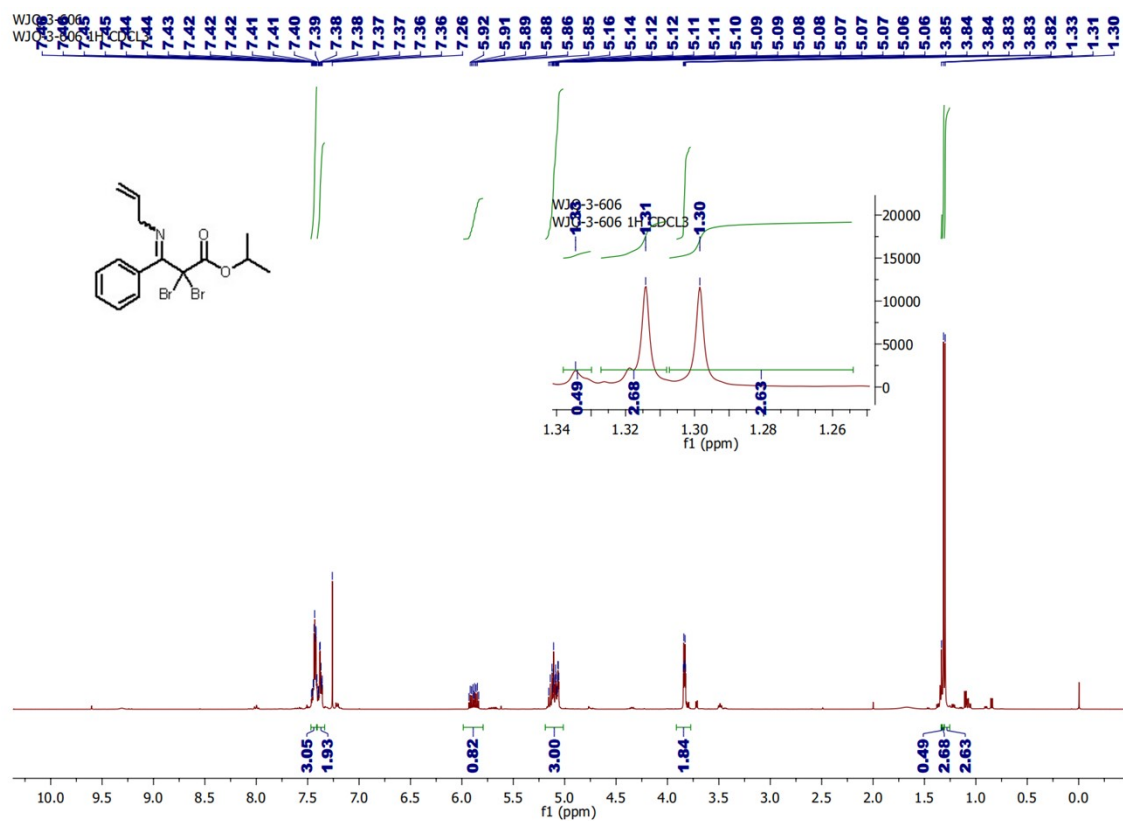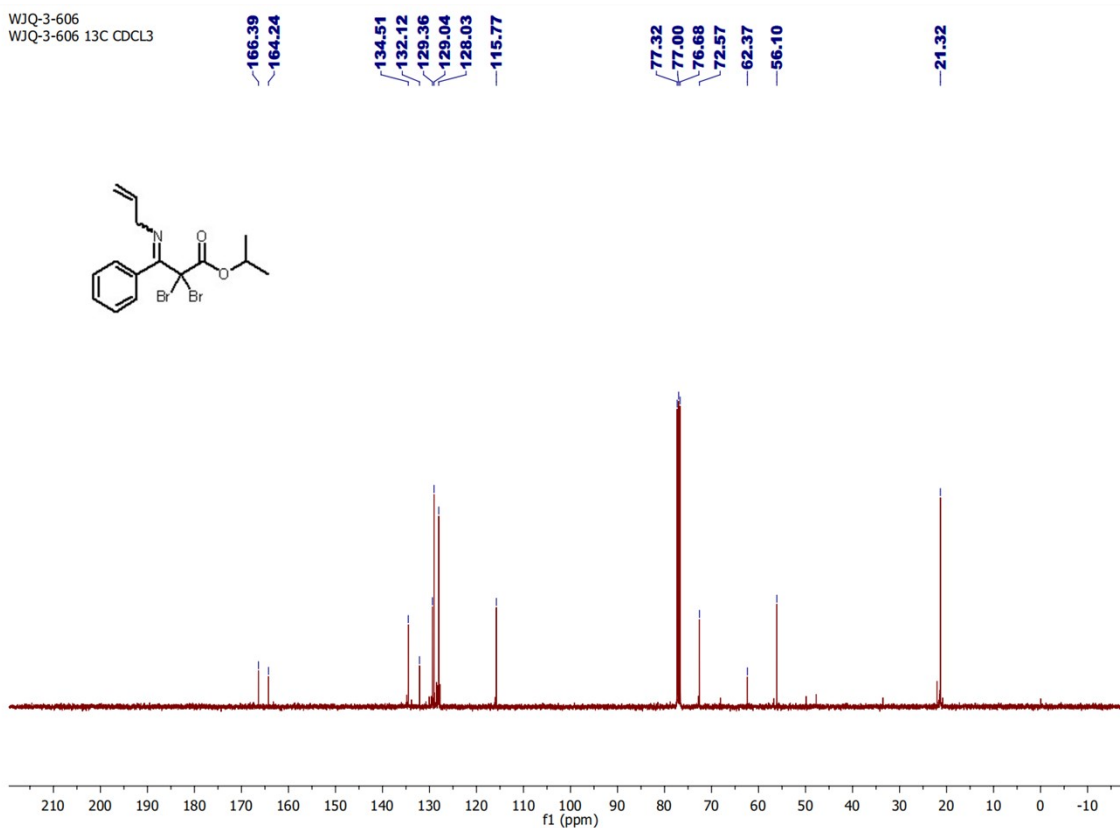

methyl 3-(allylimino)-2,2-dibromo-3-(tetrahydro-2H-pyran-4-yl)propanoate (**3h**)

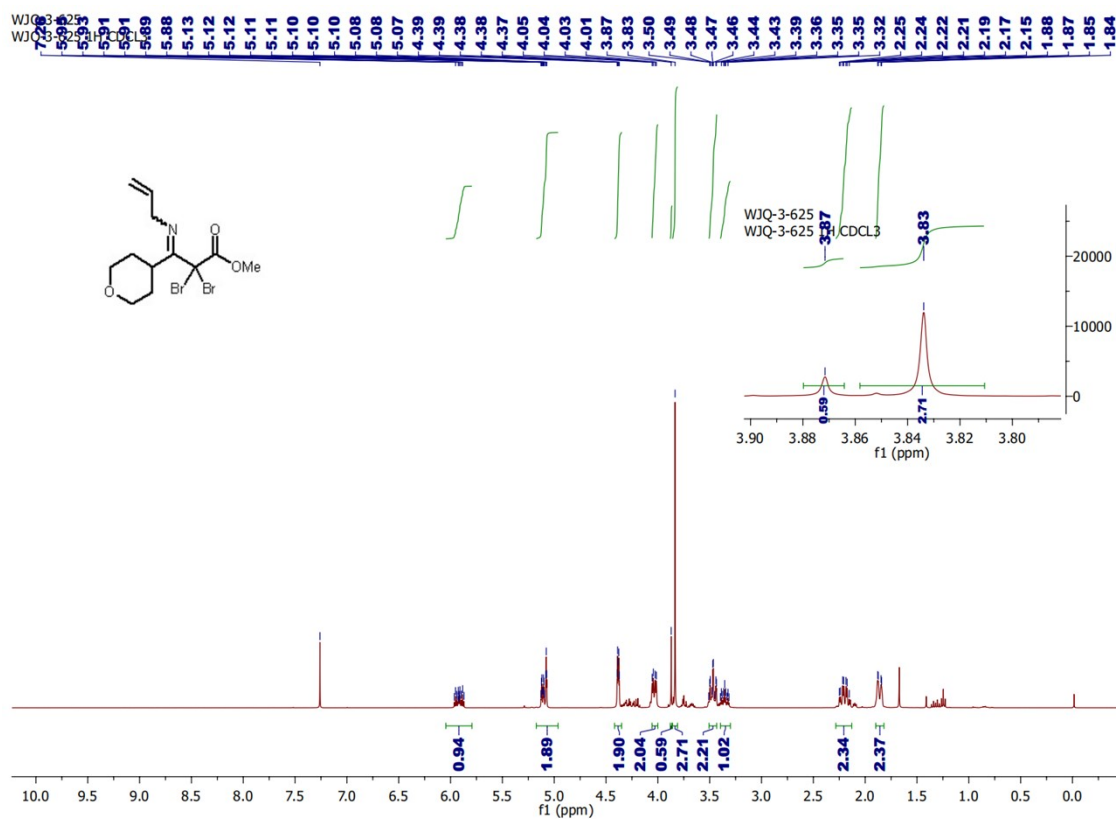

WJQ-3-625  
WJQ-3-625 13C CDCL<sub>3</sub>

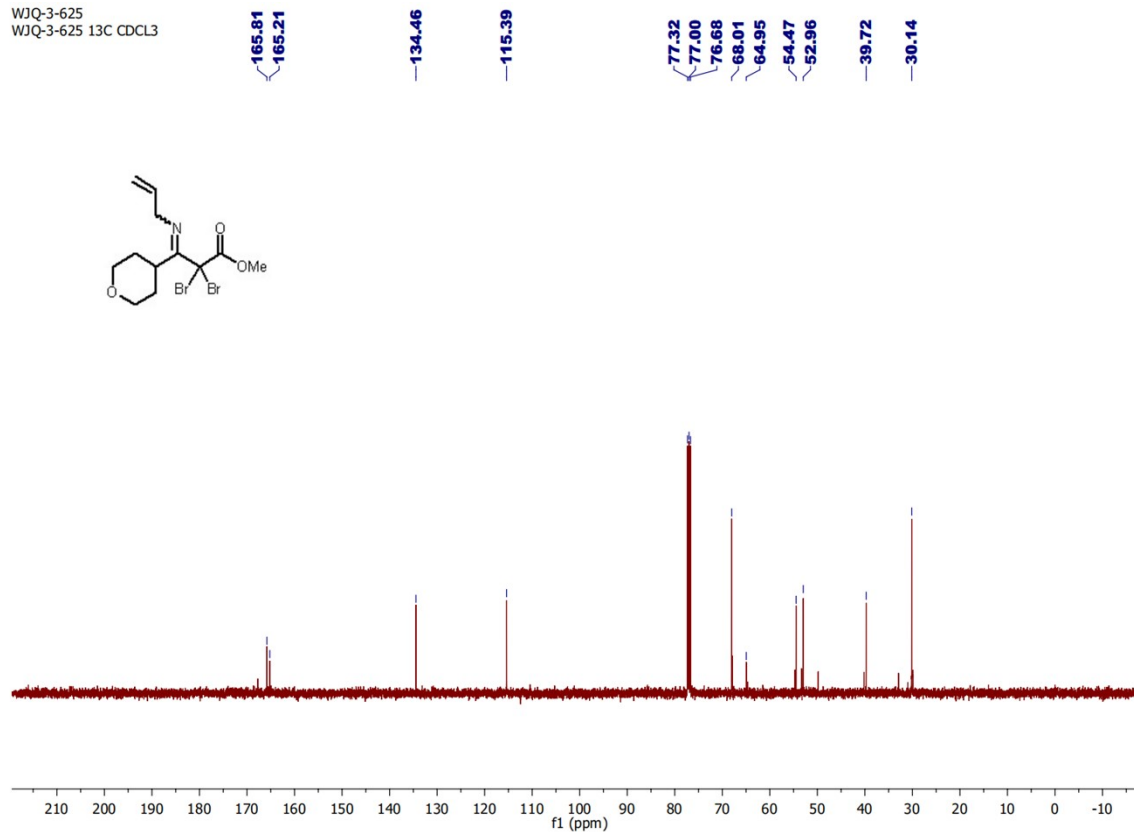

*methyl 2-phenyl-3-azabicyclo[3.1.0]hex-2-ene-1-carboxylate (4a)*

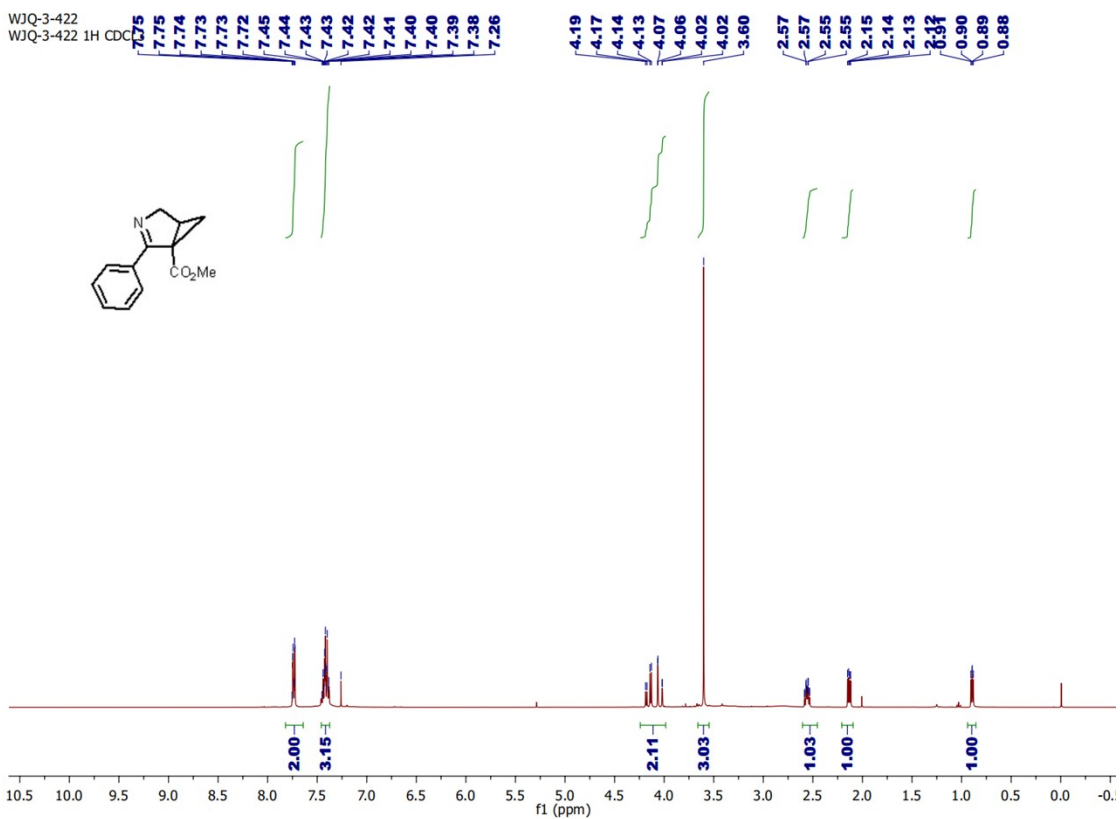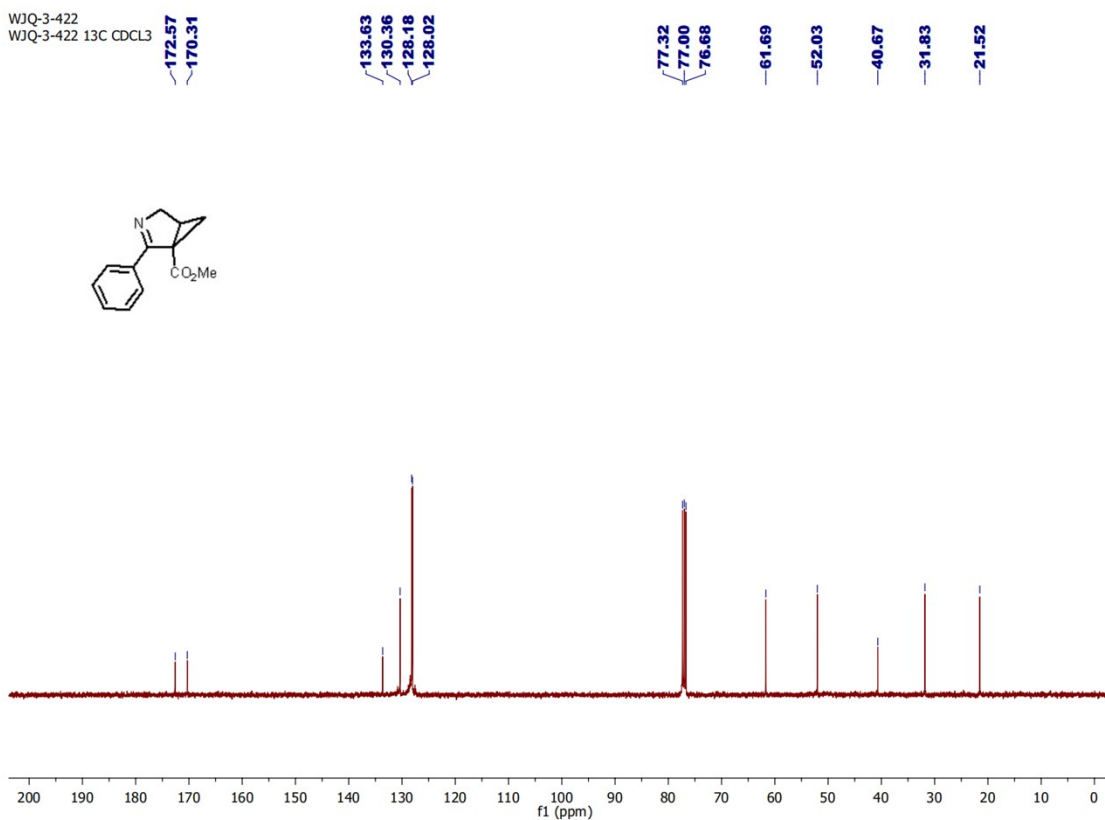

*methyl 2-(p-tolyl)-3-azabicyclo[3.1.0]hex-2-ene-1-carboxylate (4b)*

WJQ-3-553  
WJQ-3-553 1H CDCL3

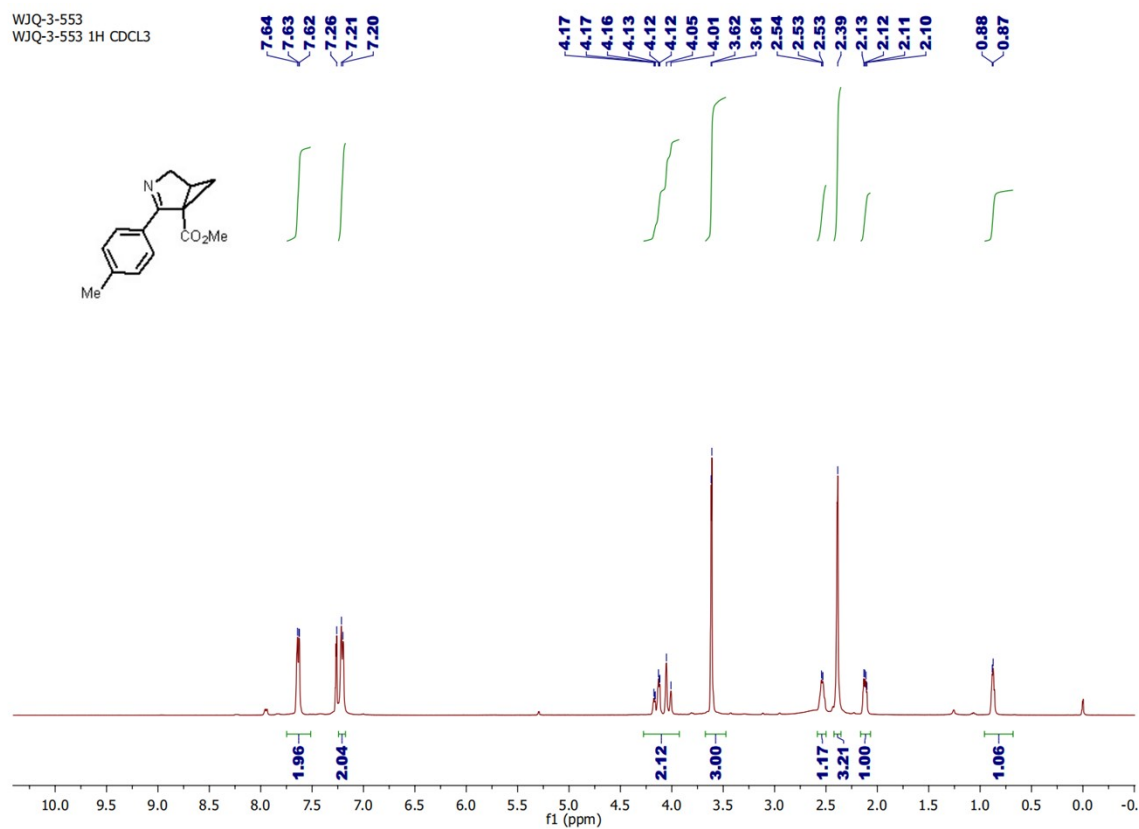

WJQ-3-553  
WJQ-3-553 13C CDCL3

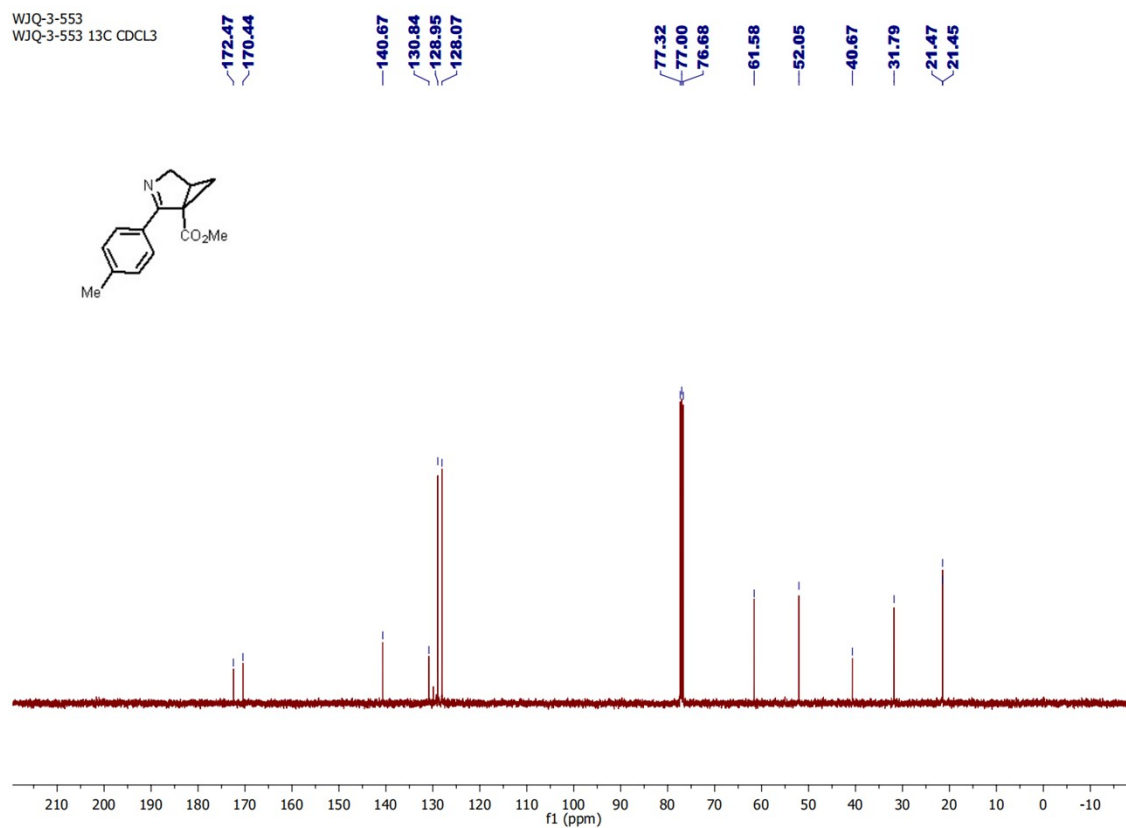

*methyl 2-(4-methoxyphenyl)-3-azabicyclo[3.1.0]hex-2-ene-1-carboxylate (4c)*

WJQ-3-590  
WJQ-3-590 1H CDCl<sub>3</sub>

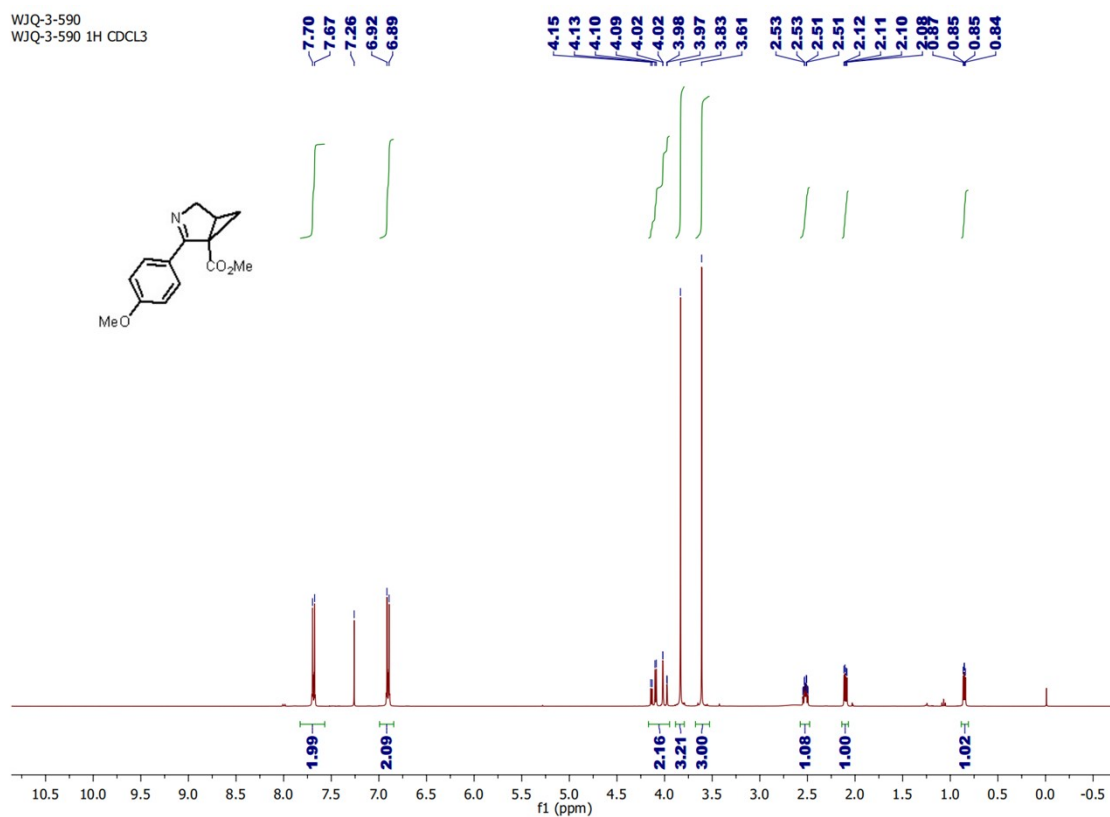

WJQ-3-590  
WJQ-3-590 13C CDCl<sub>3</sub>

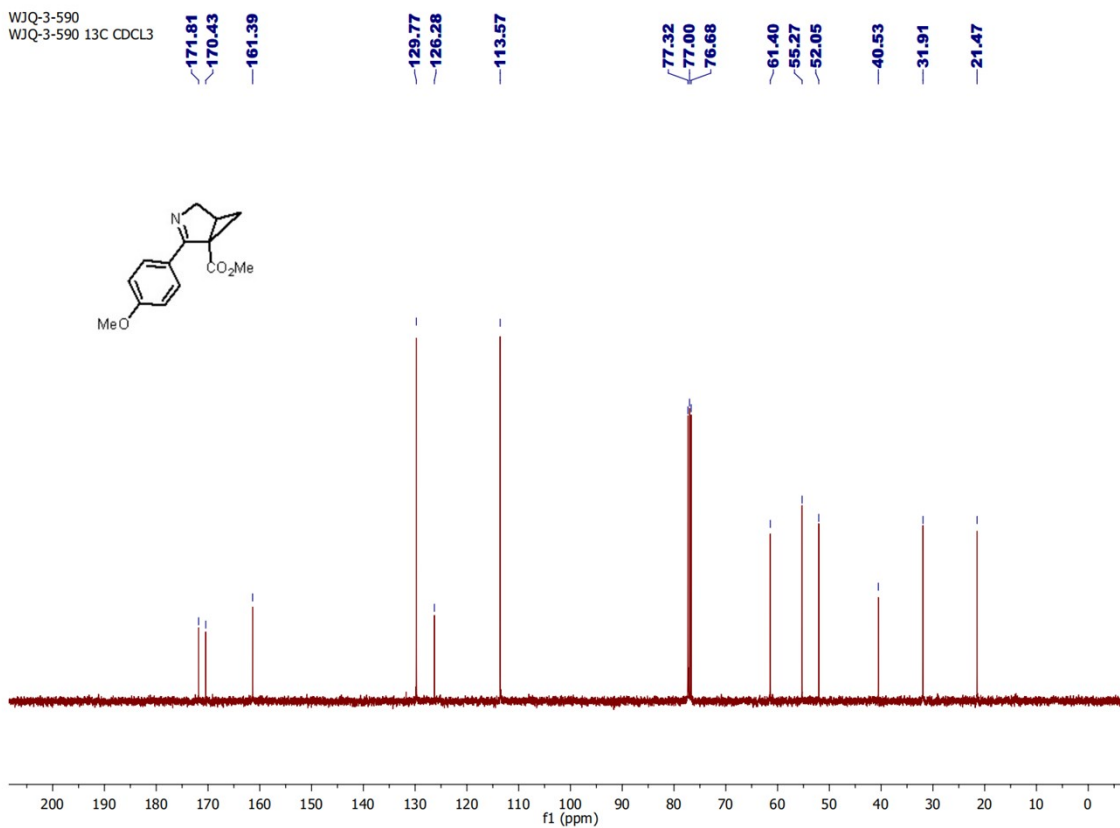

*methyl 2-(3-methoxyphenyl)-3-azabicyclo[3.1.0]hex-2-ene-1-carboxylate (4d)*

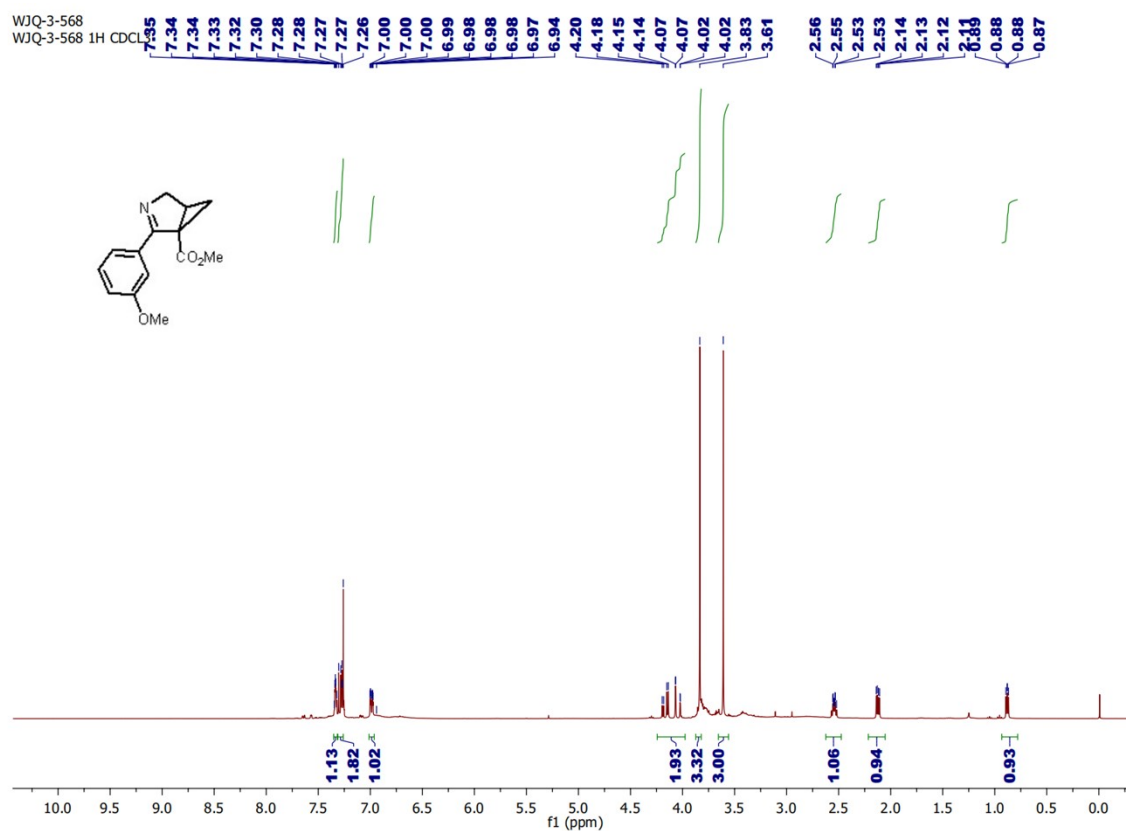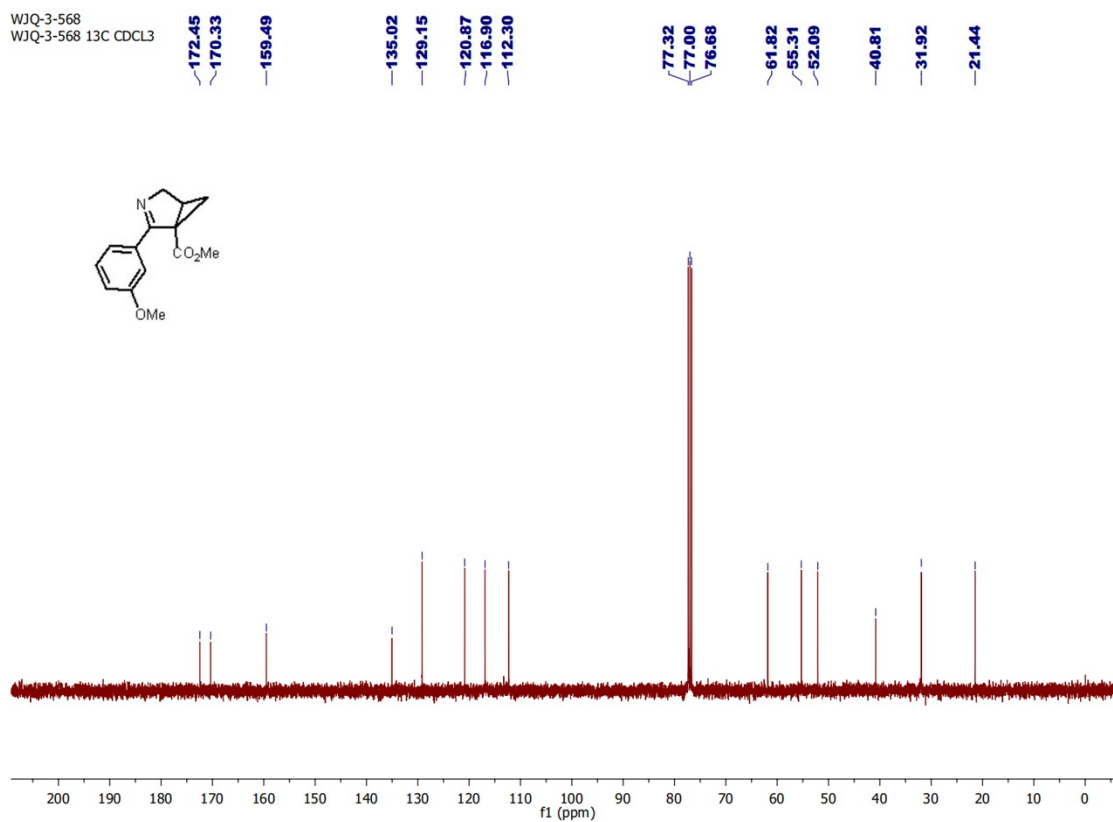

*methyl 2-(3,4-dimethoxyphenyl)-3-azabicyclo[3.1.0]hex-2-ene-1-carboxylate (4e)*

WJQ-3-573  
WJQ-3-573 1H CDCl<sub>3</sub>

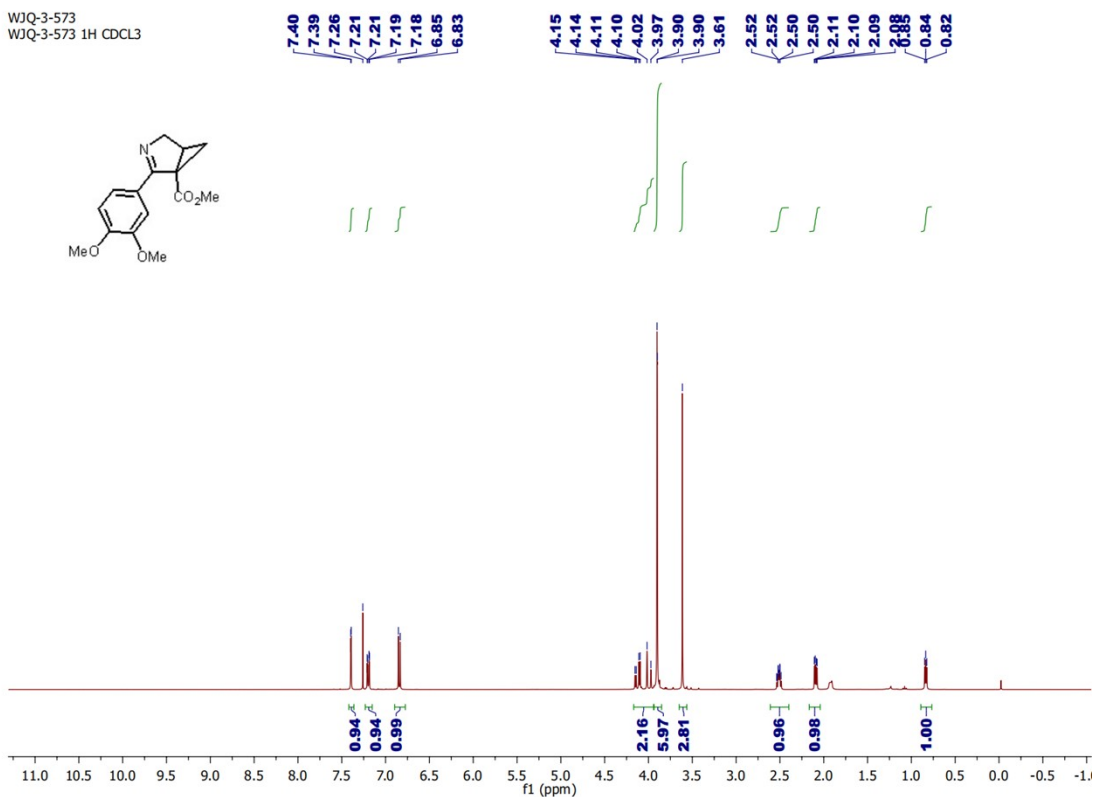

WJQ-3-573  
WJQ-3-573 13C CDCl<sub>3</sub>

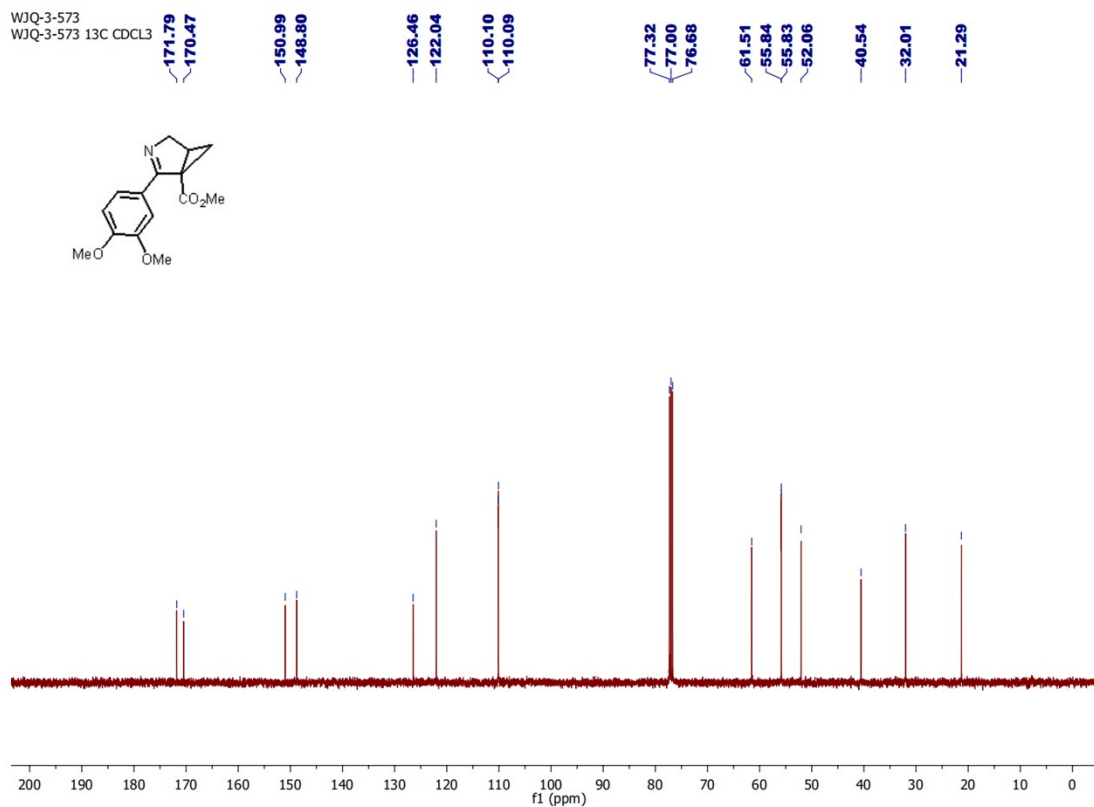

methyl 2-(4-(trifluoromethyl)phenyl)-3-azabicyclo[3.1.0]hex-2-ene-1-carboxylate (**4f**)

WJQ-3-567  
WJQ-3-567 1H CDCL3

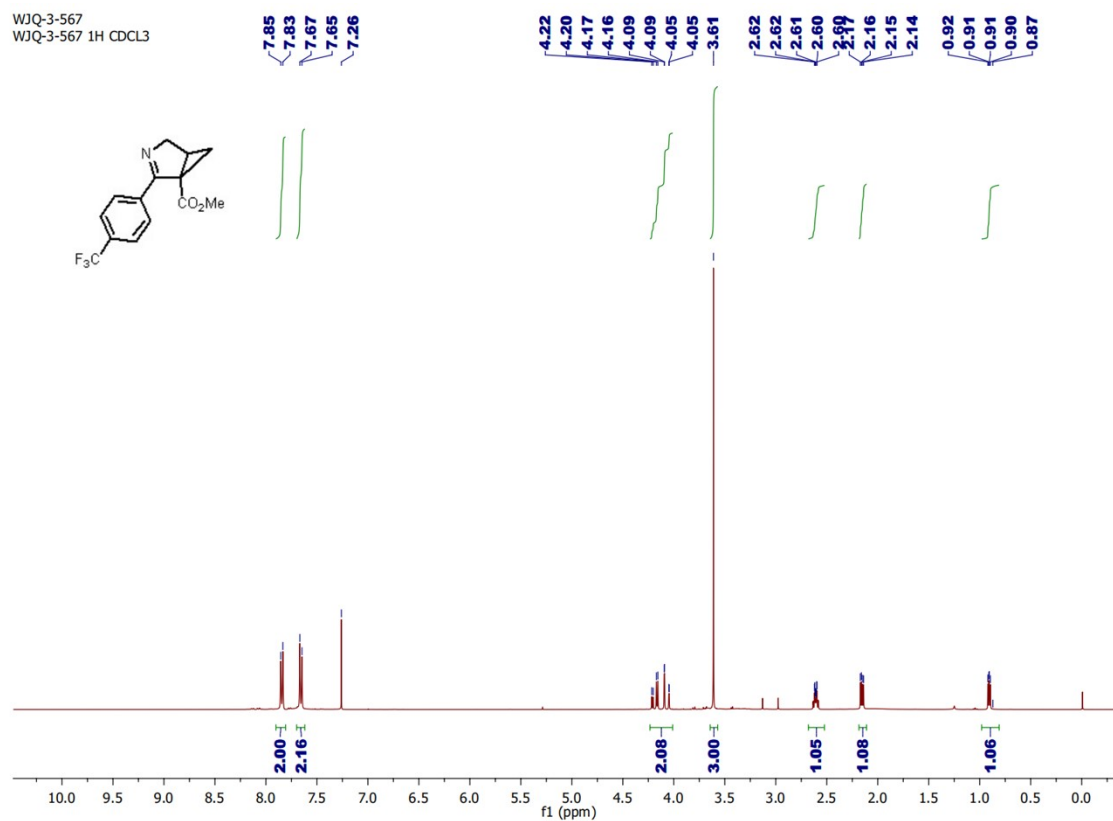

WJQ-3-567  
WJQ-3-567 13C CDCL3

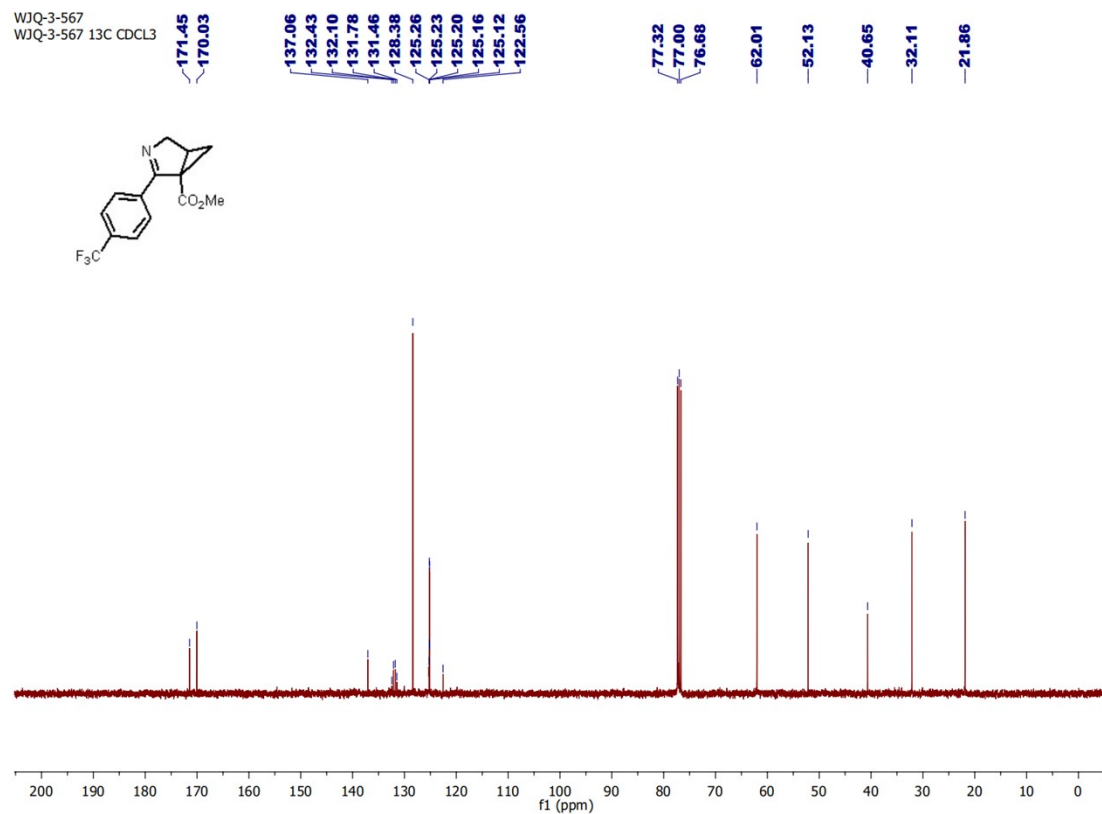

*methyl 2-(4-fluorophenyl)-3-azabicyclo[3.1.0]hex-2-ene-1-carboxylate (4g)*

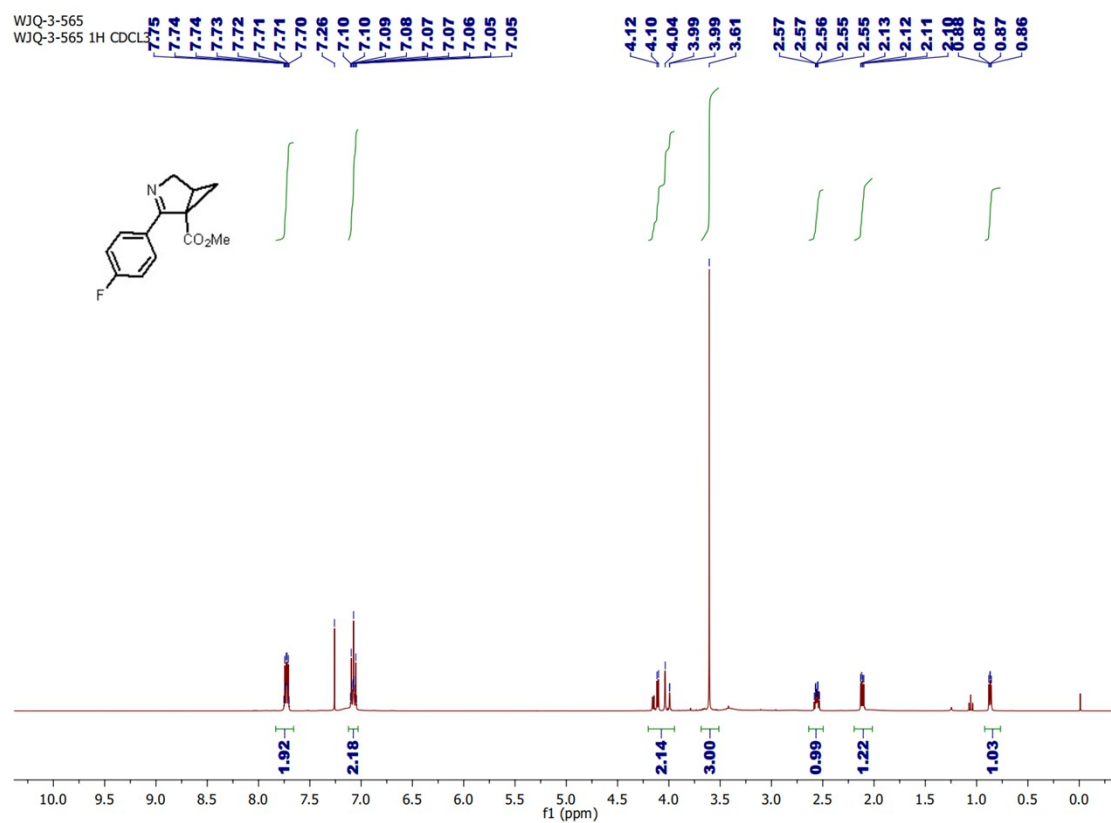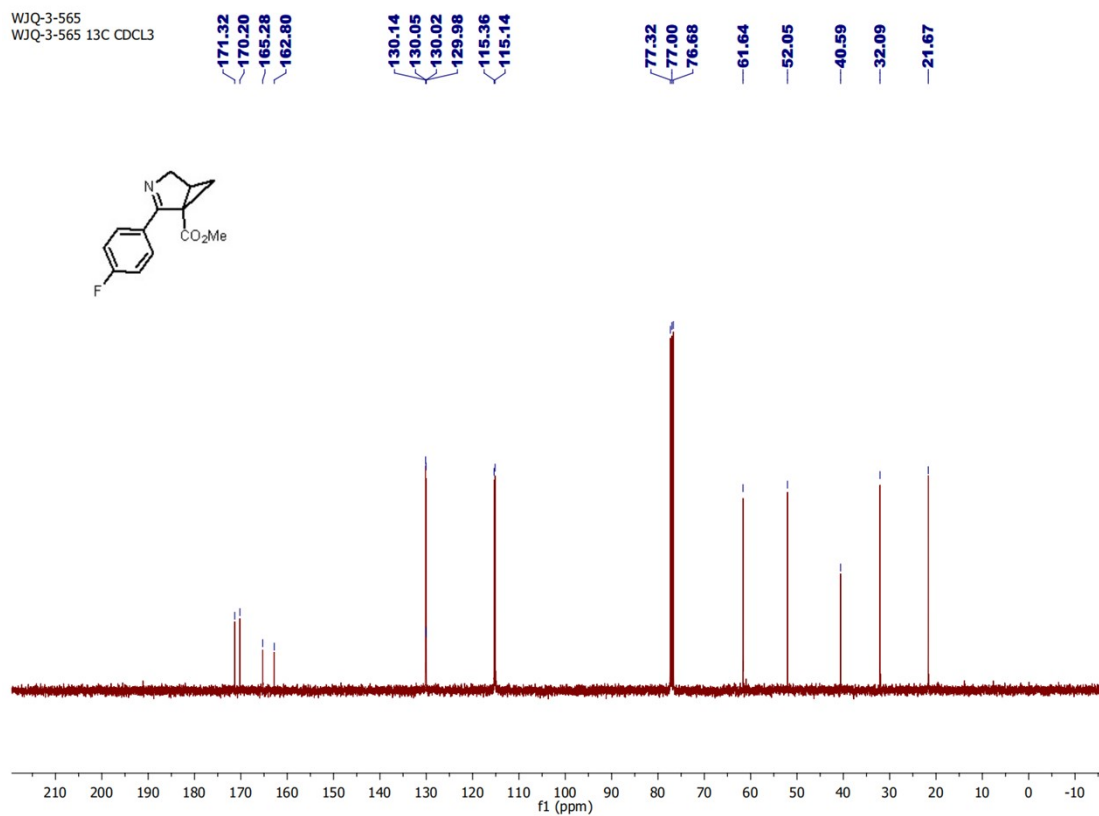

methyl 2-(4-chlorophenyl)-3-azabicyclo[3.1.0]hex-2-ene-1-carboxylate (**4h**)

WJQ-3-552  
WJQ-3-552 1H CDCL<sub>3</sub>

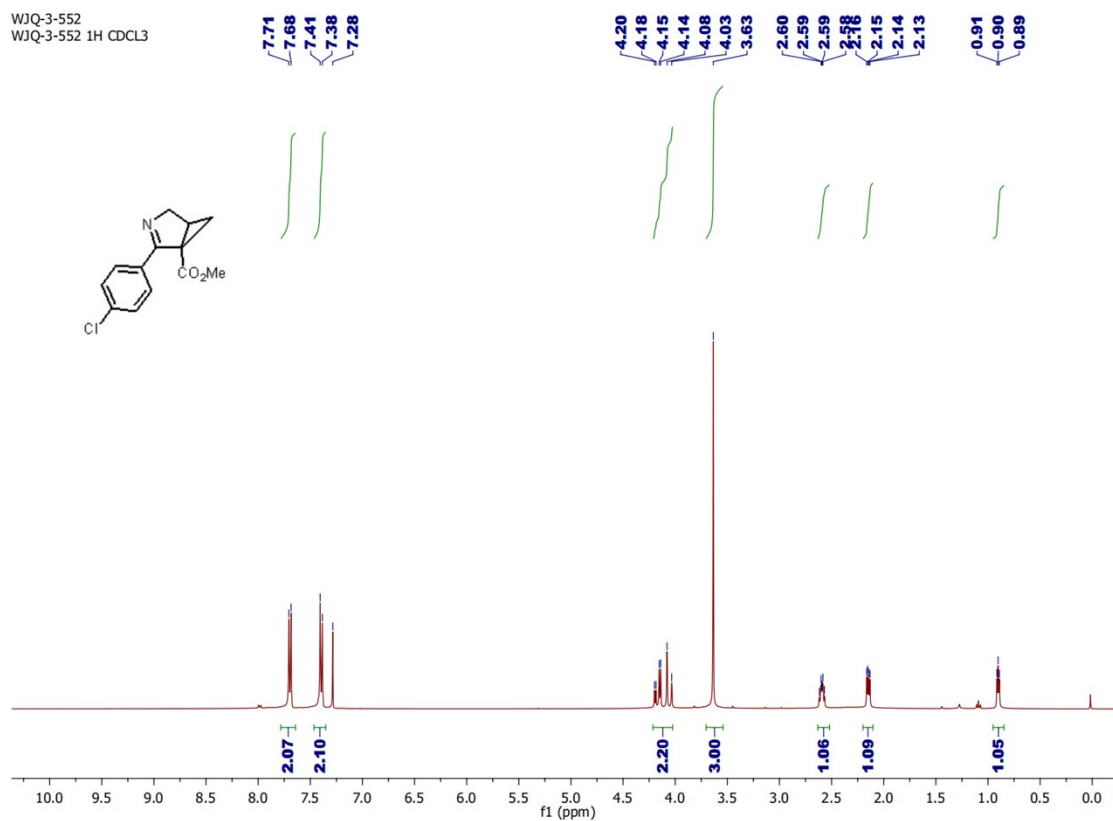

WJQ-3-552  
WJQ-3-552 13C CDCL<sub>3</sub>

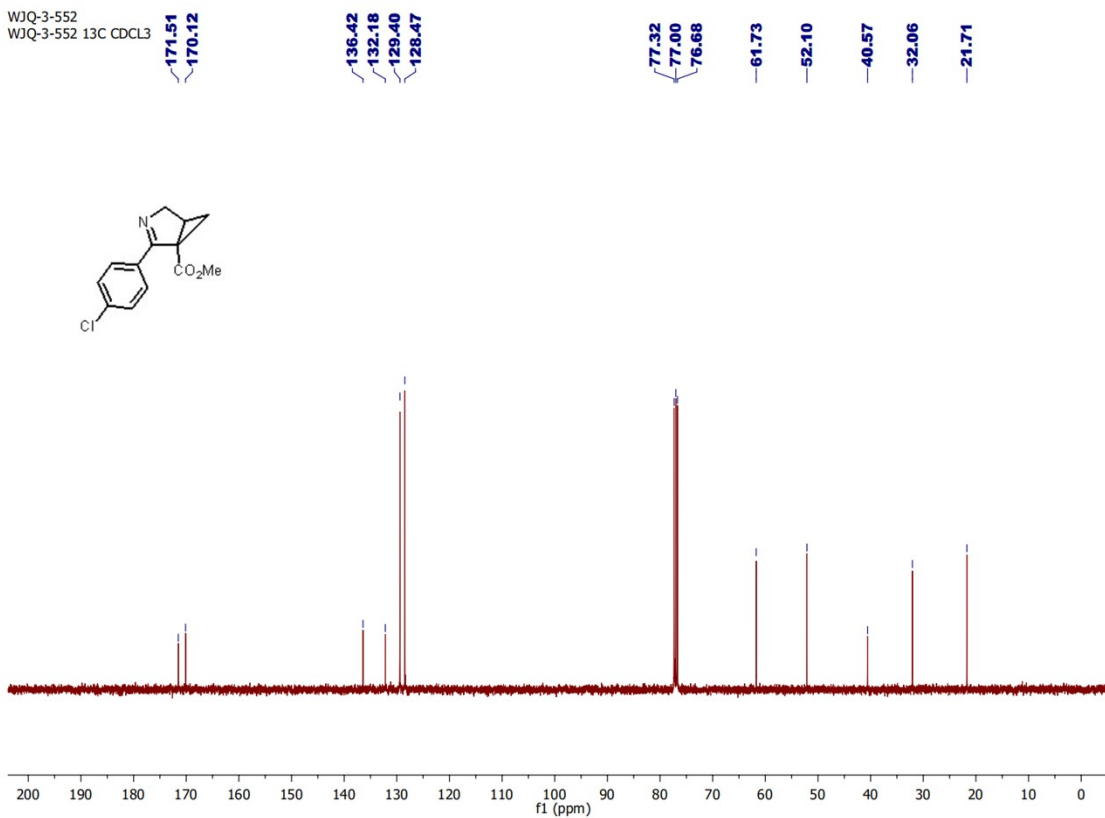

methyl 2-(2-chlorophenyl)-3-azabicyclo[3.1.0]hex-2-ene-1-carboxylate (**4i**)

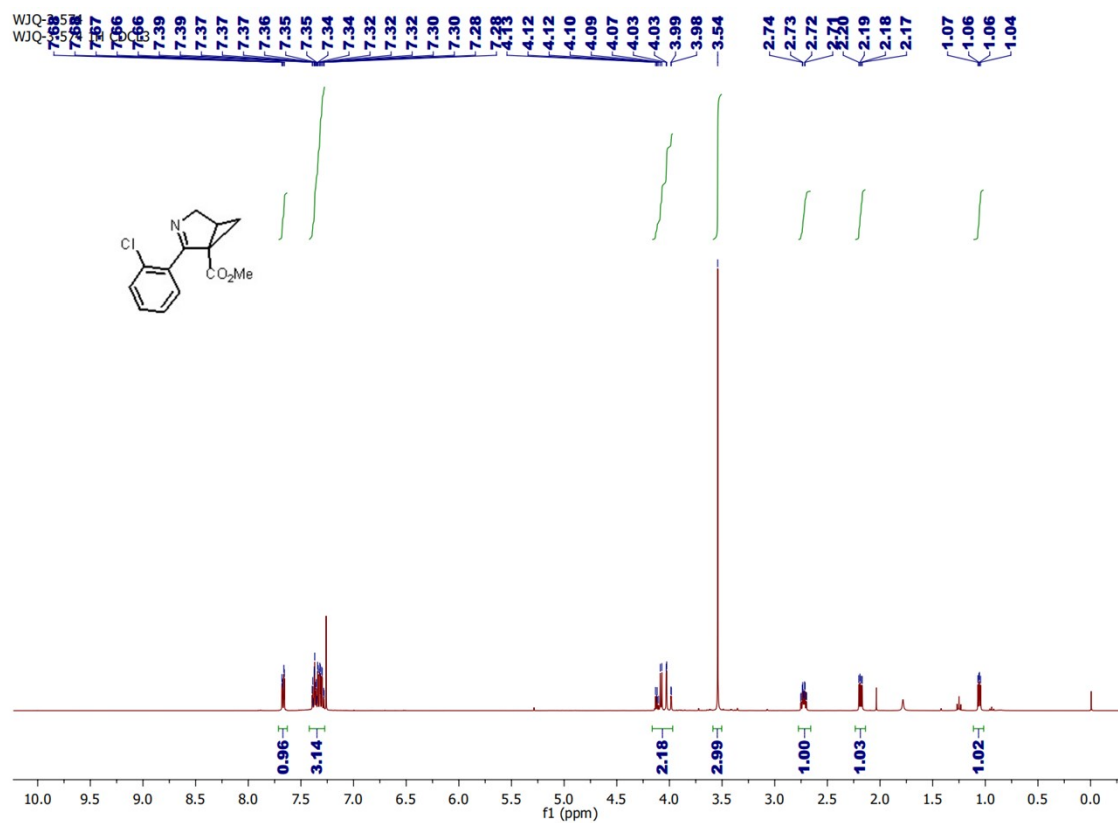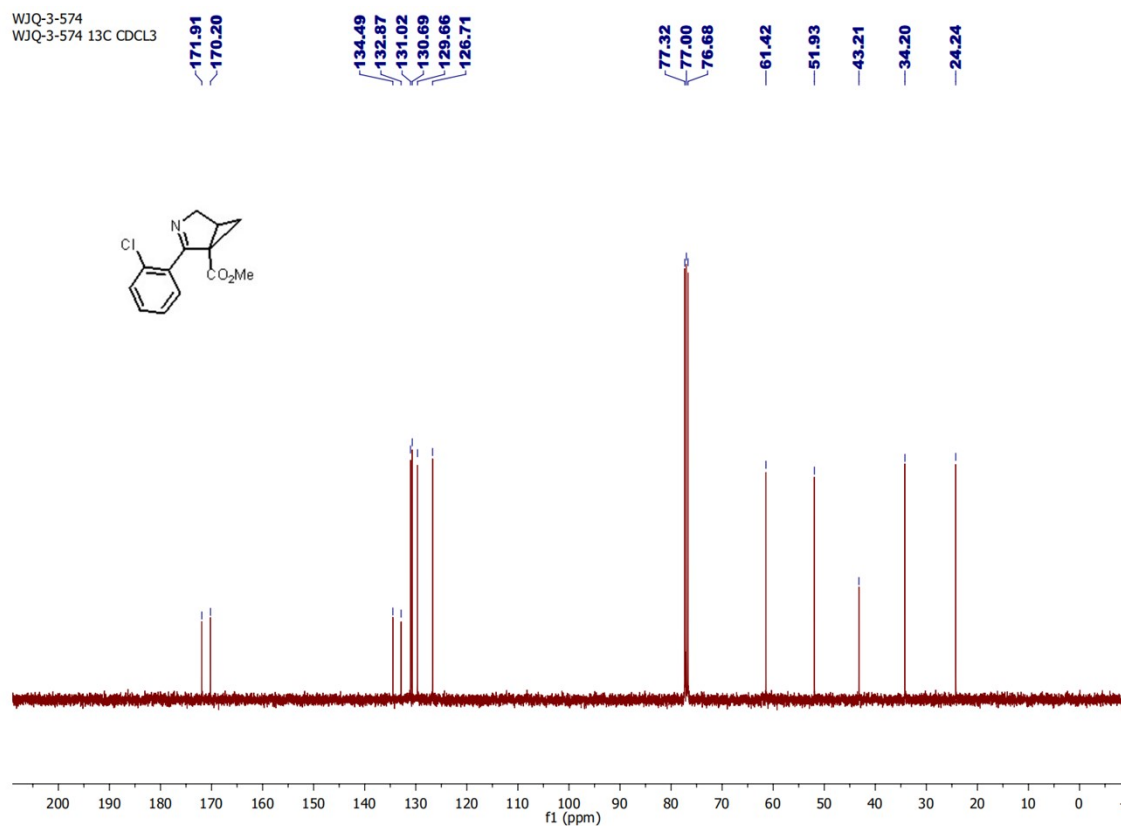

*methyl 2-(thiophen-2-yl)-3-azabicyclo[3.1.0]hex-2-ene-1-carboxylate (4j)*

WJQ-3-587  
WJQ-3-587 1H CDCL<sub>3</sub>

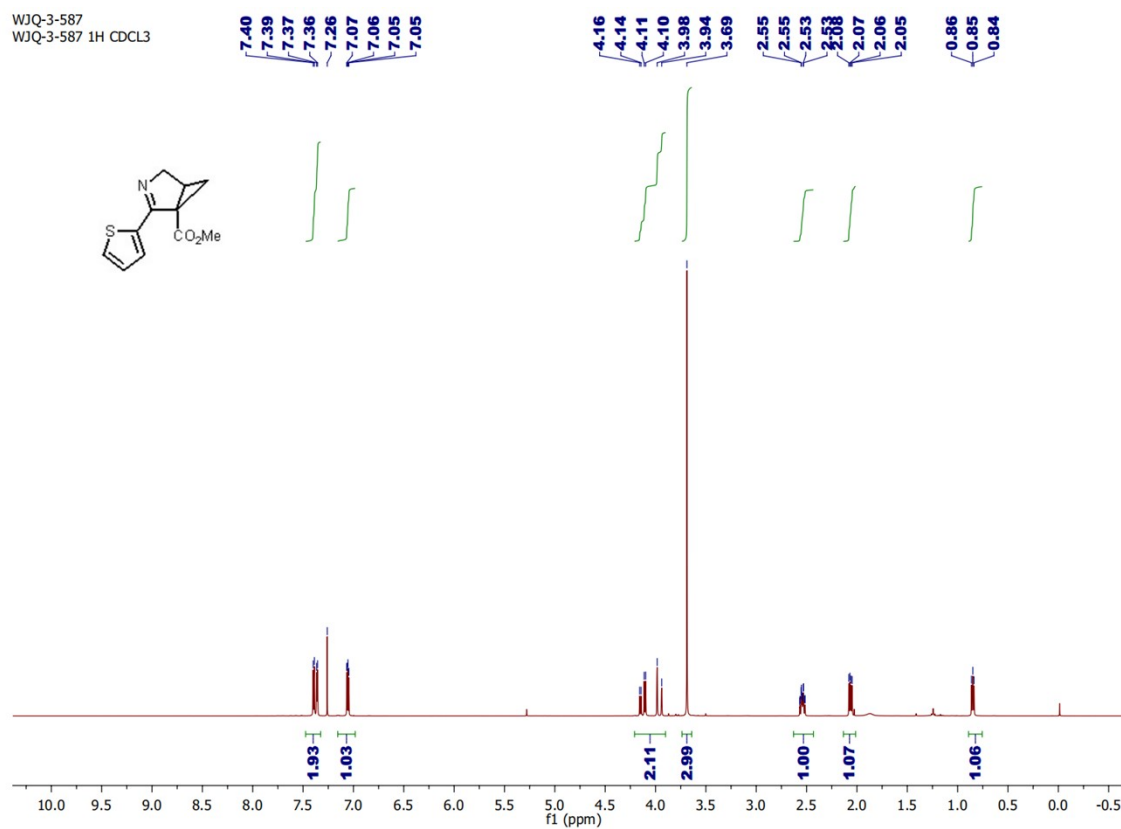

WJQ-3-587  
WJQ-3-587 13C CDCL<sub>3</sub>

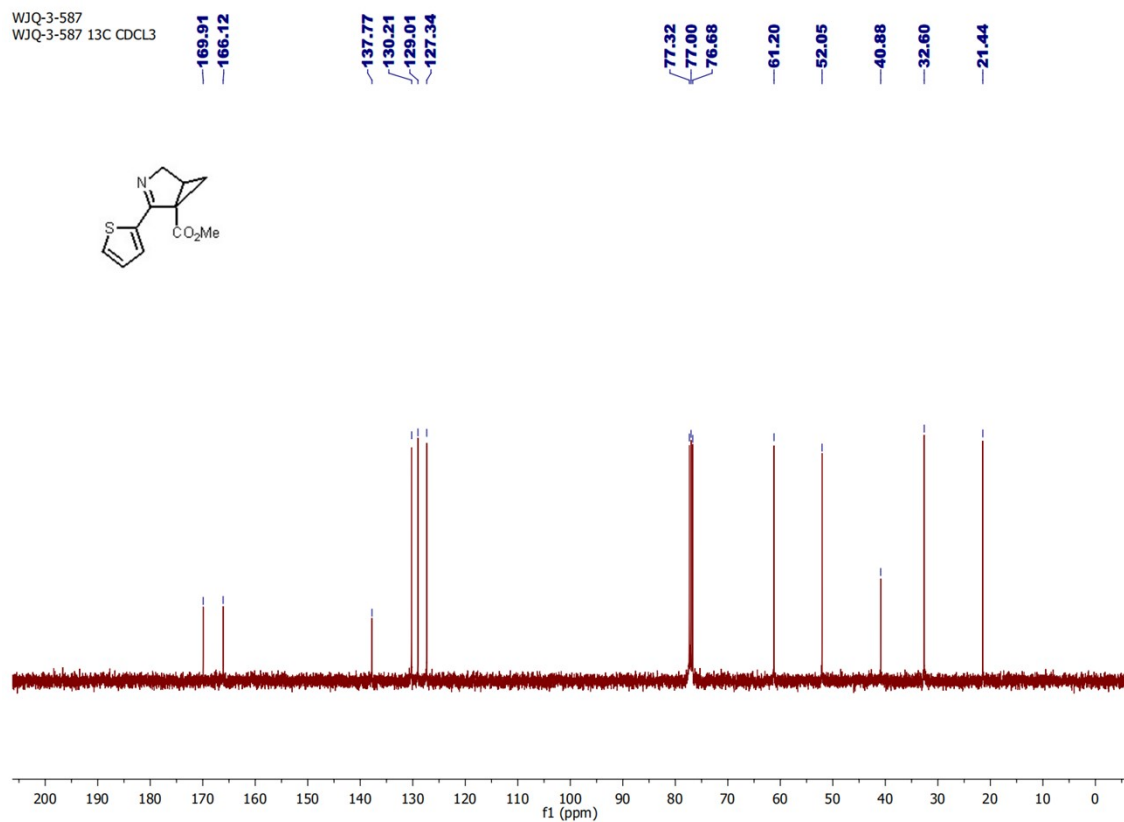

*ethyl 2-phenyl-3-azabicyclo[3.1.0]hex-2-ene-1-carboxylate (4k)*

WJQ-3-566  
WJQ-3-566 1H CDCL<sub>3</sub>

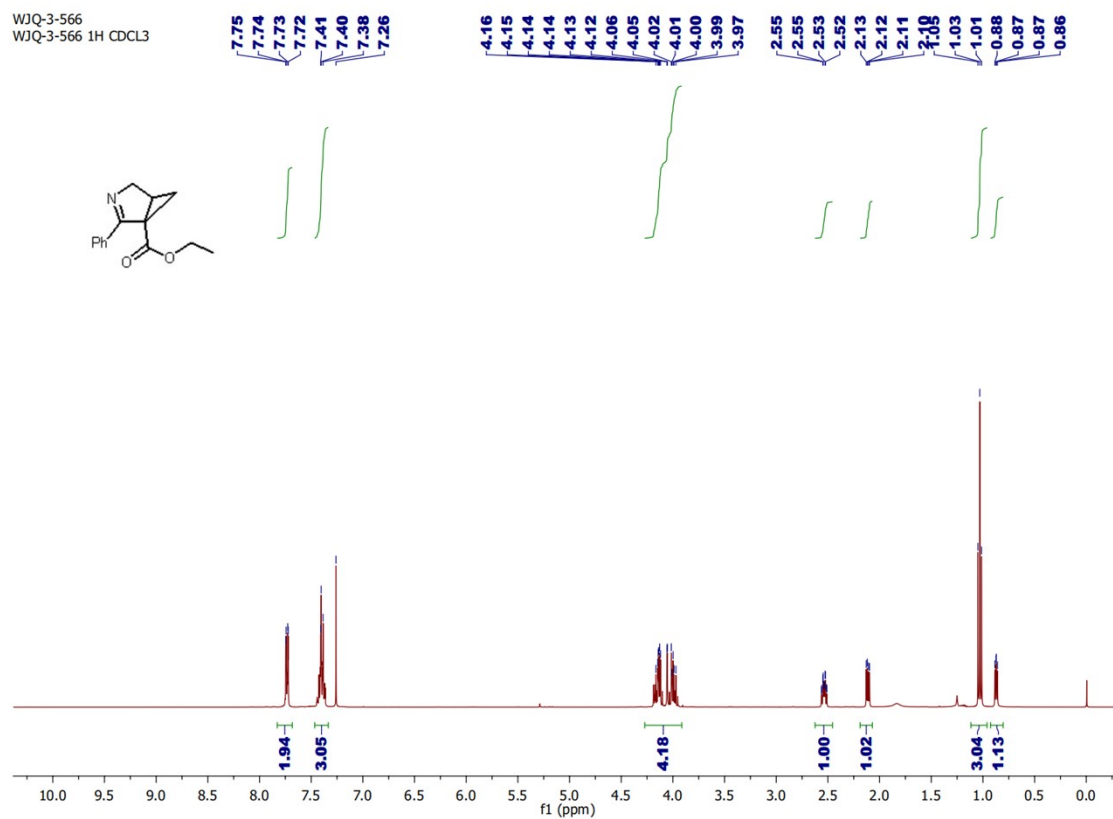

WJQ-3-566  
WJQ-3-566 13C CDCL<sub>3</sub>

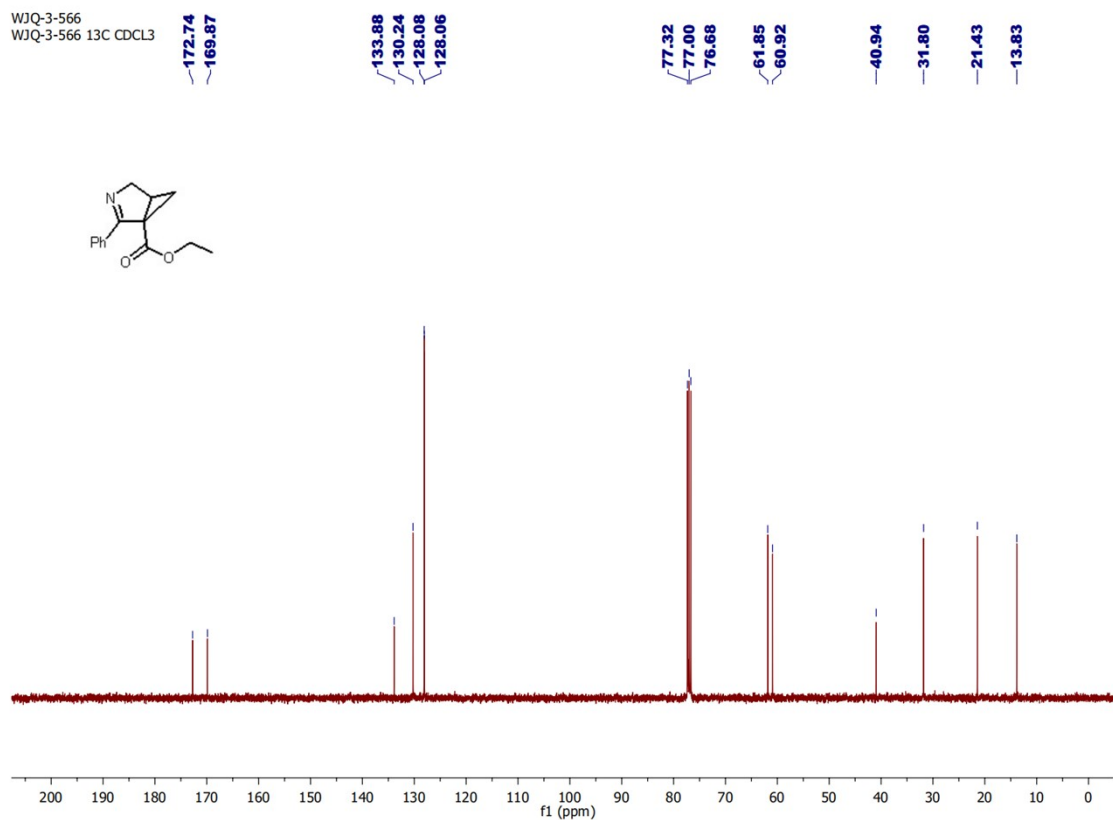

*isopropyl 2-phenyl-3-azabicyclo[3.1.0]hex-2-ene-1-carboxylate (4I)*

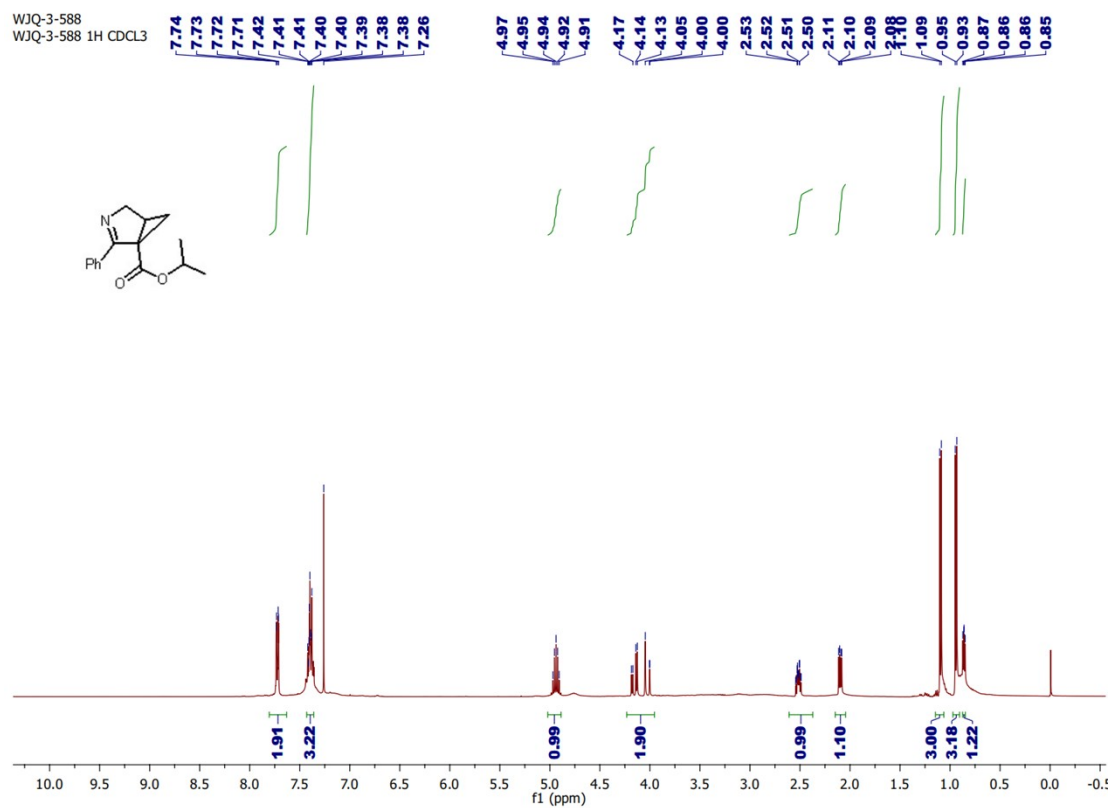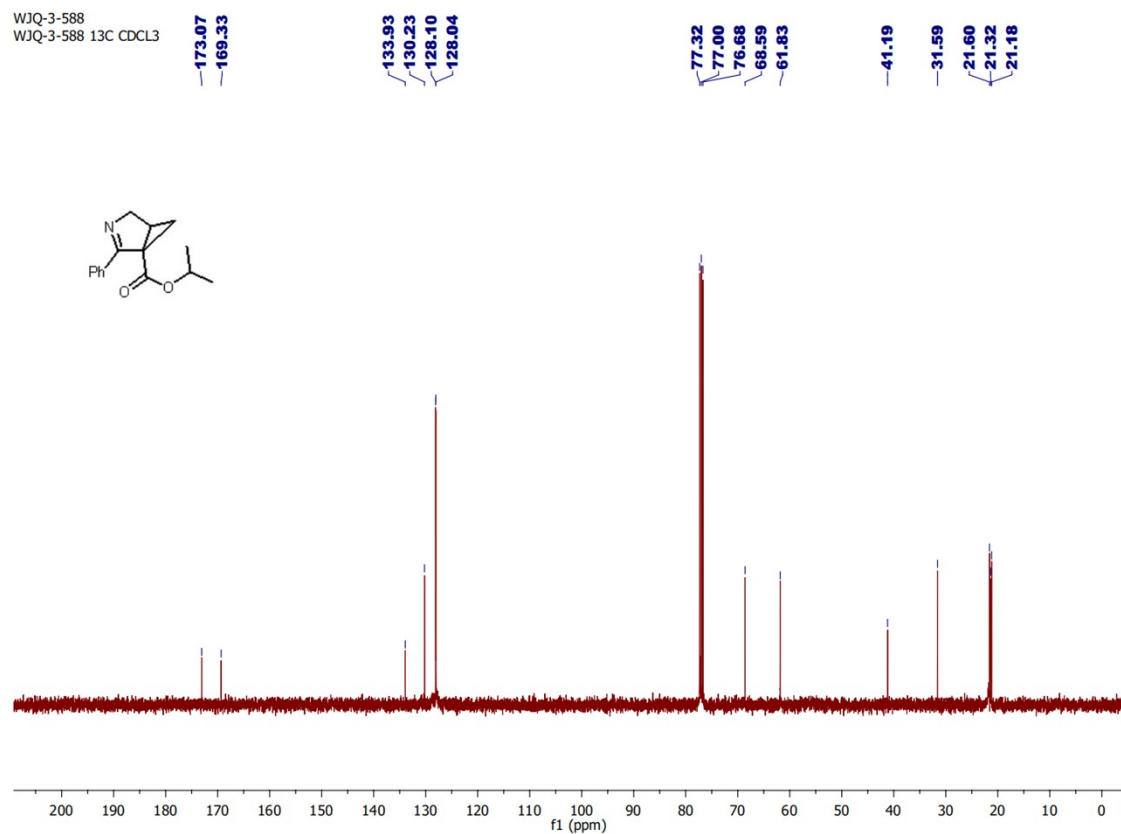

butyl 2-phenyl-3-azabicyclo[3.1.0]hex-2-ene-1-carboxylate (**4m**)

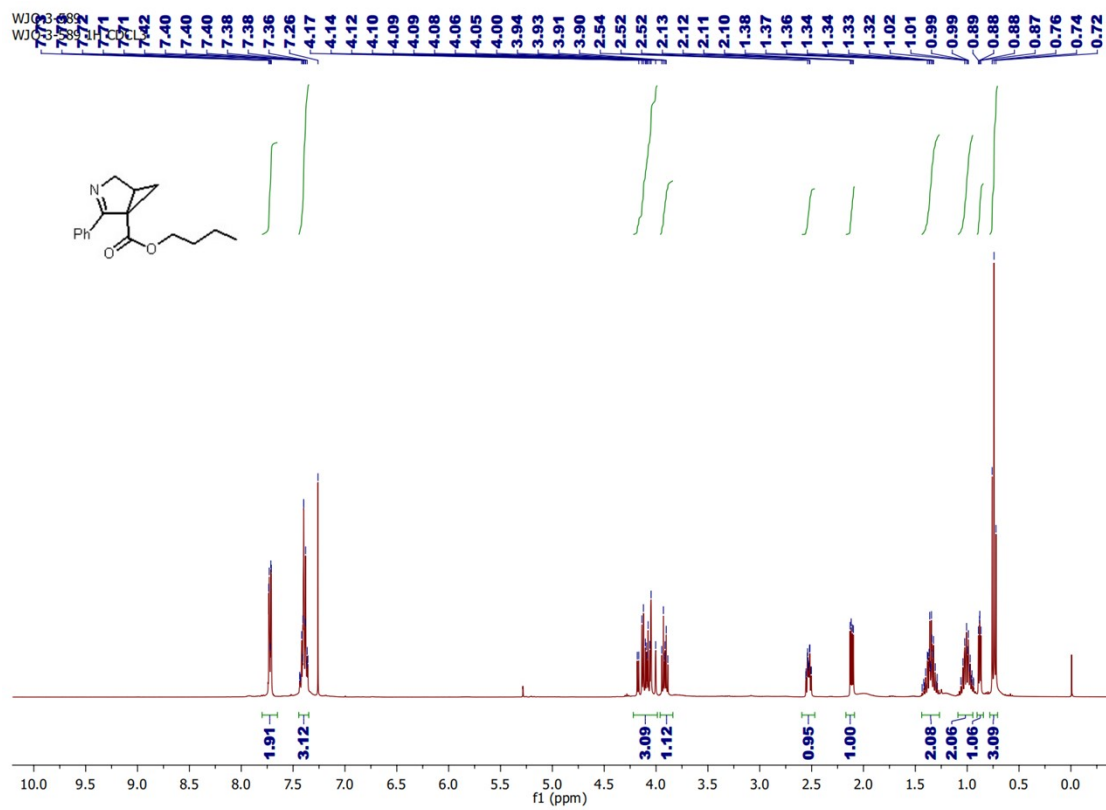

WJQ-3-589  
WJQ-3-589 13C CDCl3

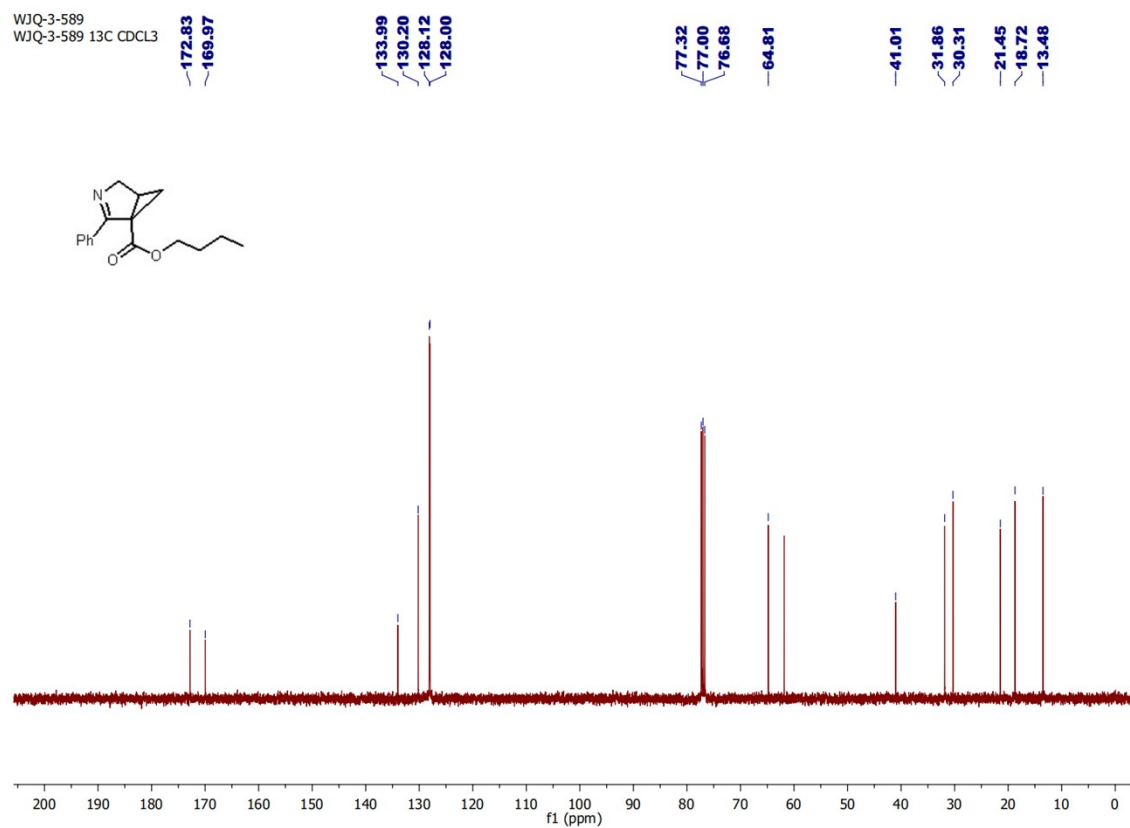

(1*S*,2*R*,5*S*)-2-isopropyl-5-methylcyclohexyl  
carboxylate (**4n**)

2-phenyl-3-azabicyclo[3.1.0]hex-2-ene-1-

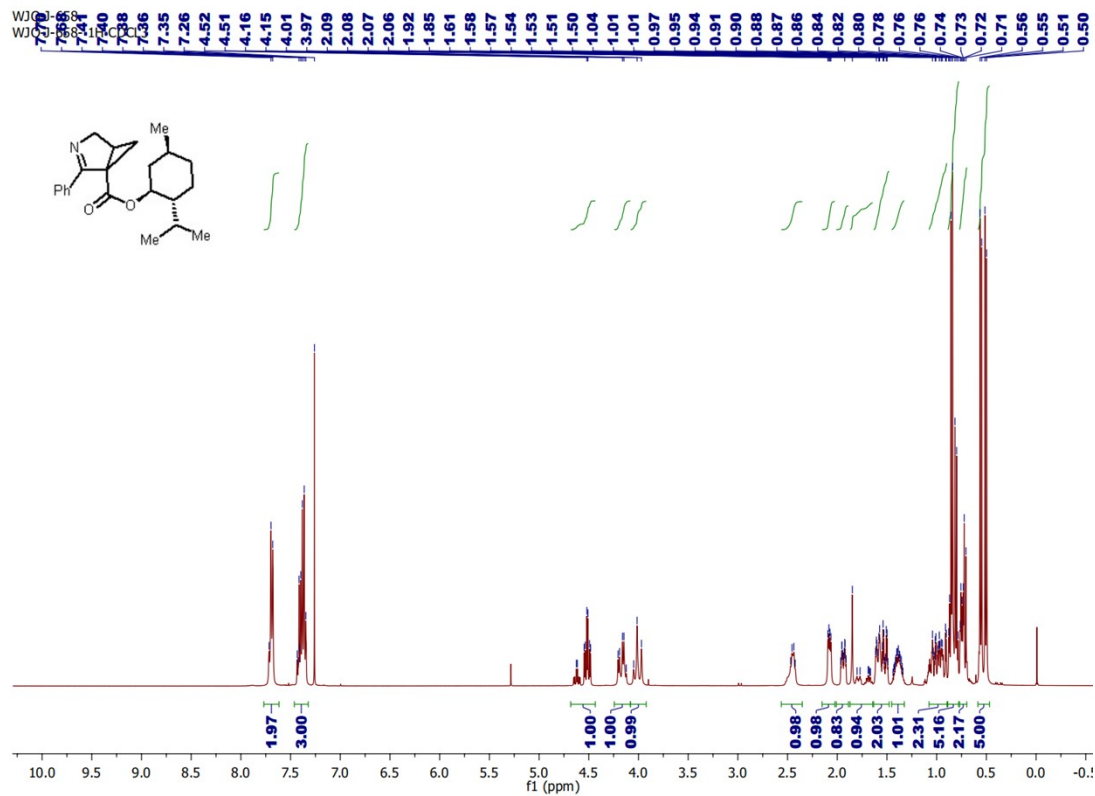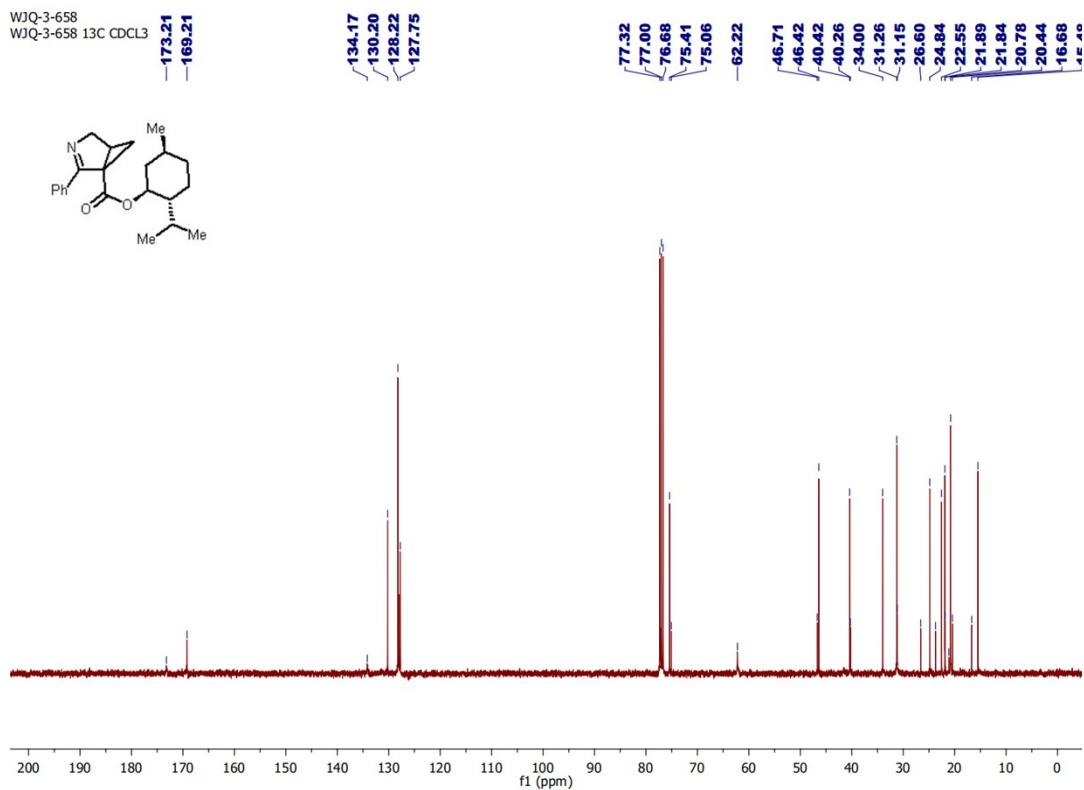

(1*R*,2*R*,4*R*)-1,7,7-trimethylbicyclo[2.2.1]heptan-2-yl 2-phenyl-3-azabicyclo[3.1.0]hex-2-ene-1-carboxylate (**4o**)

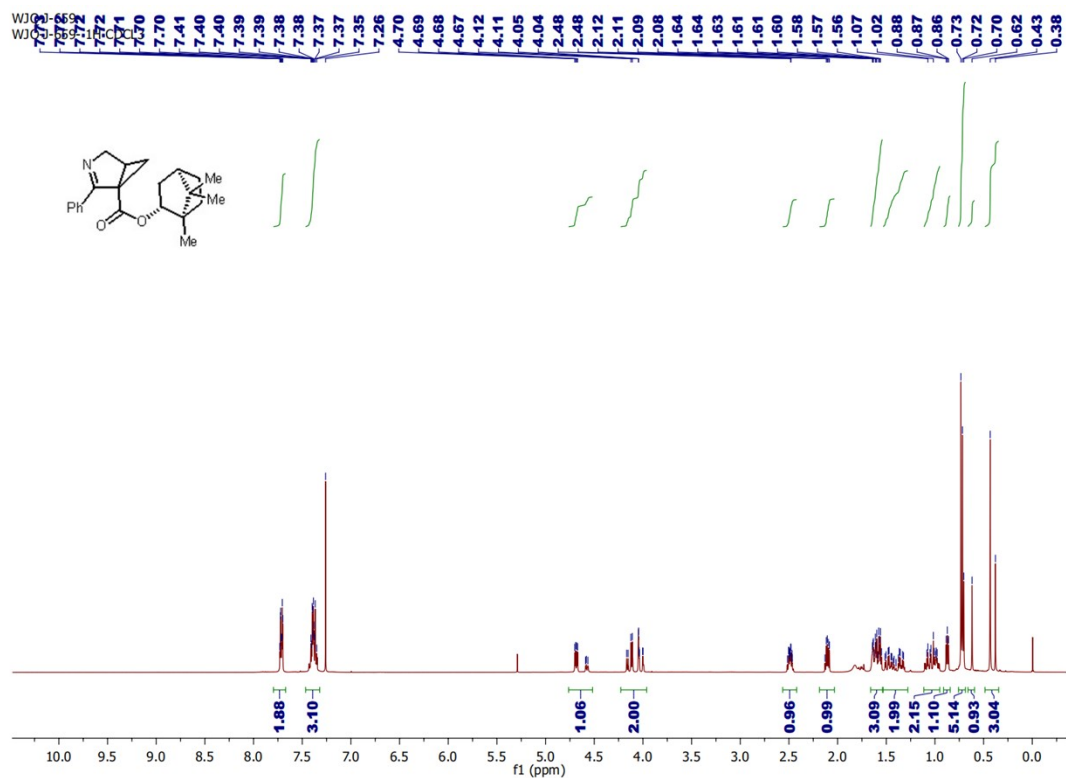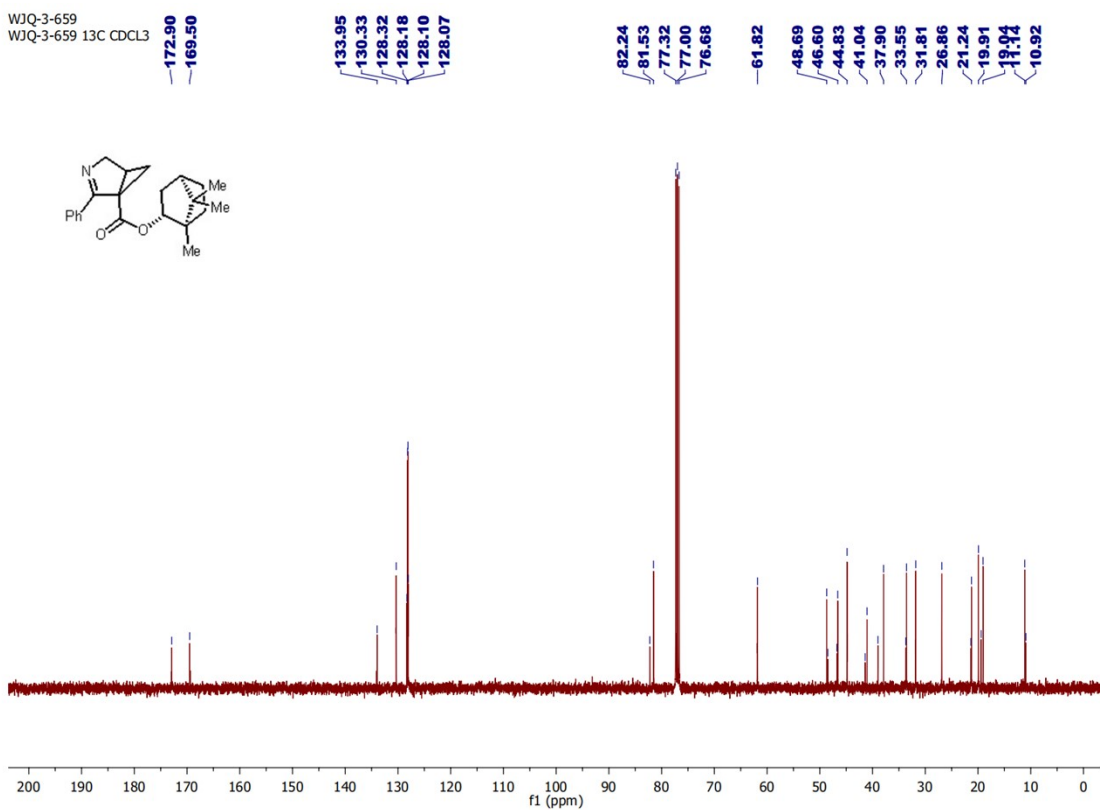

(*S*)-3,7-dimethyloct-6-en-1-yl 2-phenyl-3-azabicyclo[3.1.0]hex-2-ene-1-carboxylate (**4p**)

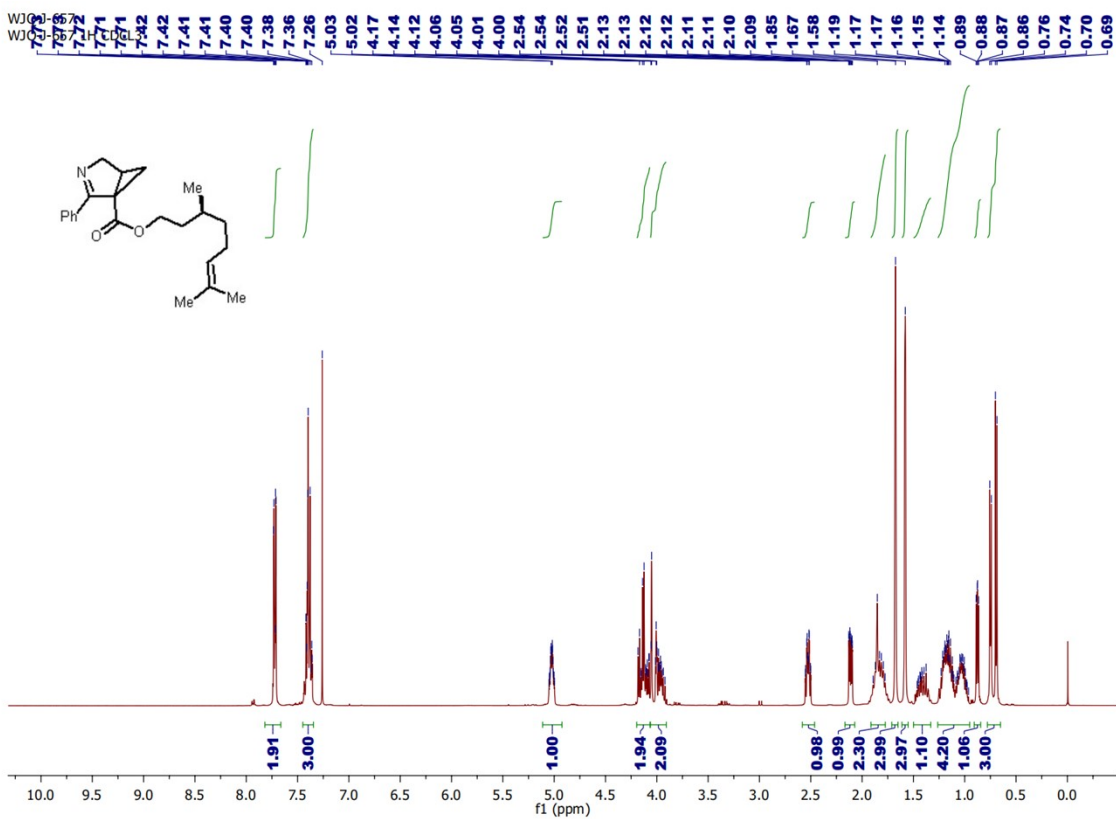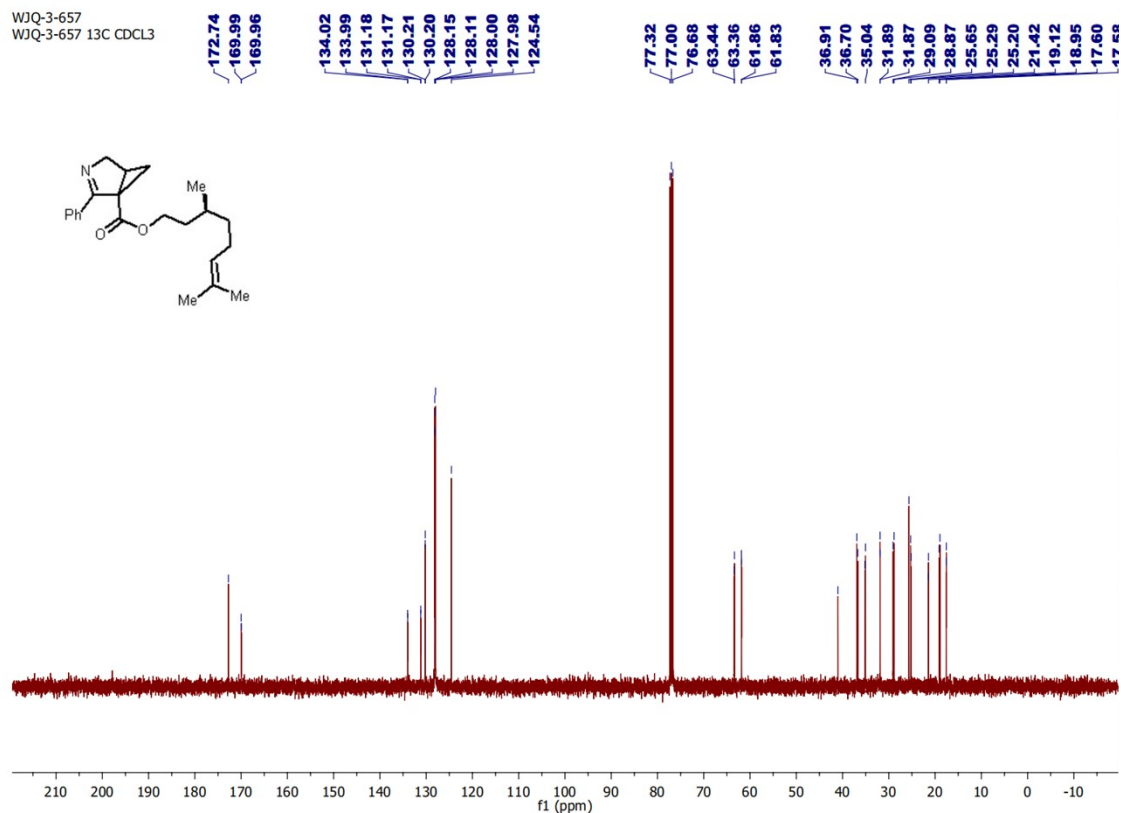

*phenyl(2-phenyl-3-azabicyclo[3.1.0]hex-2-en-1-yl)methanone (4q)*

WJQ-3-454  
WJQ-3-454 1H CDCL<sub>3</sub>

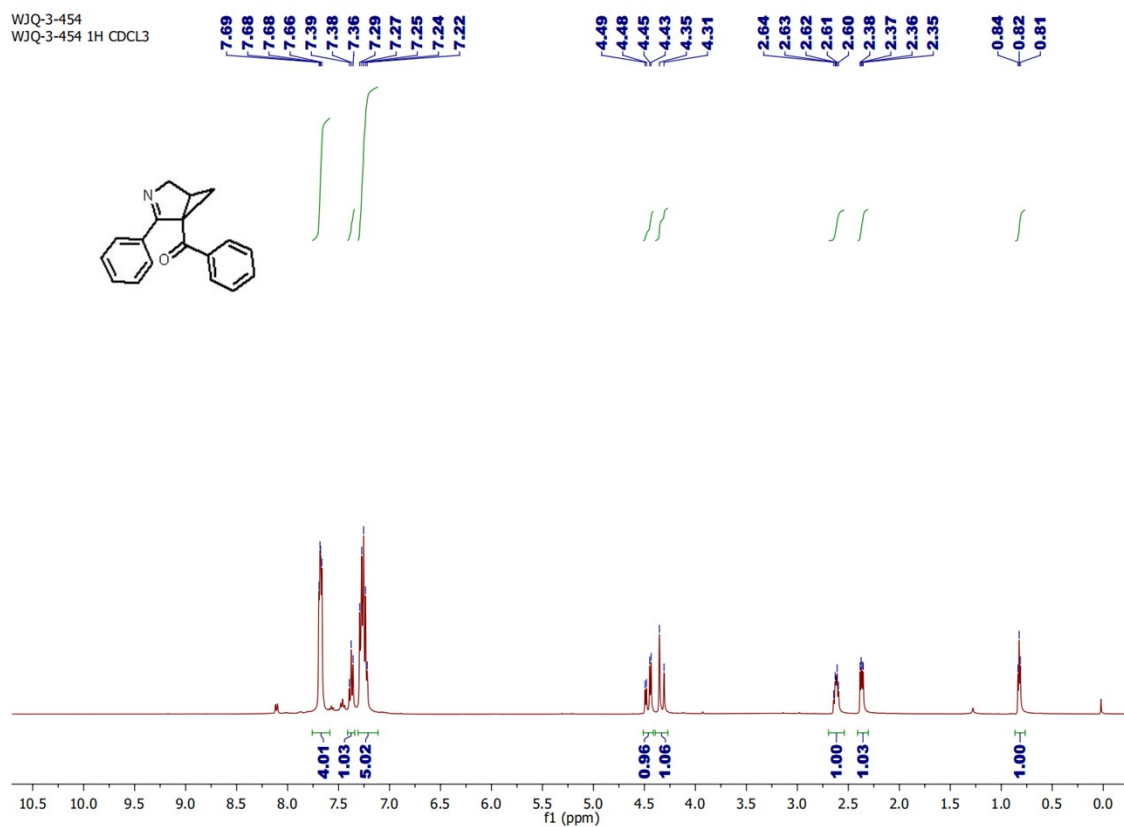

WJQ-3-454  
WJQ-3-454 13C CDCL<sub>3</sub>

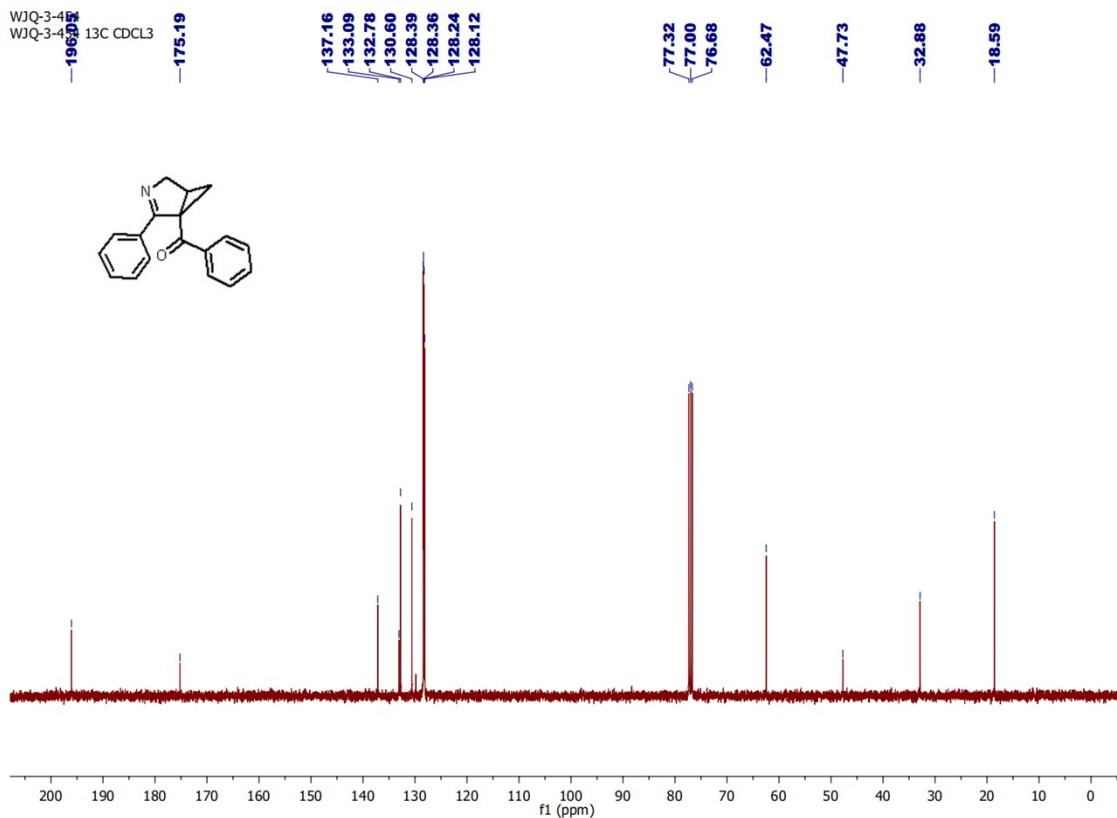

2-phenyl-3-azabicyclo[3.1.0]hex-2-ene-1-carbonitrile (**4r**)

WJQ-3-513B  
WJQ-3-513B 1H CDCL3

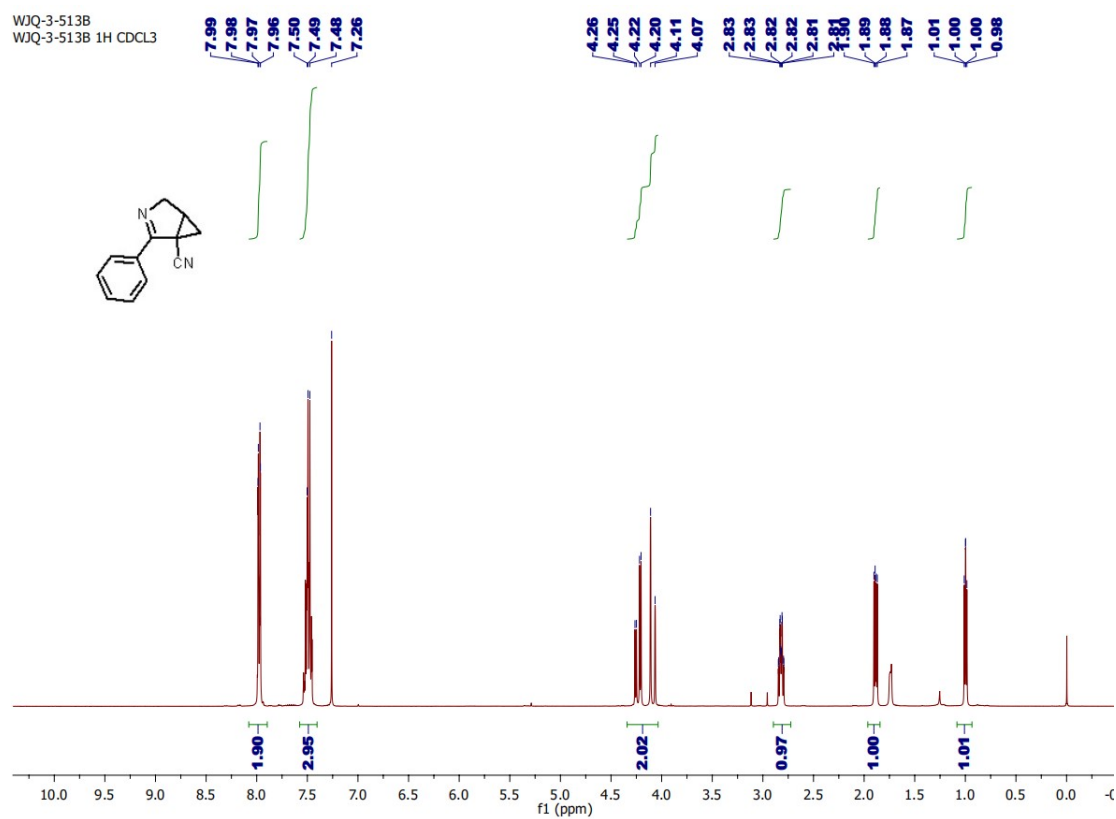

WJQ-3-513B  
WJQ-3-513B 13C CDCL3

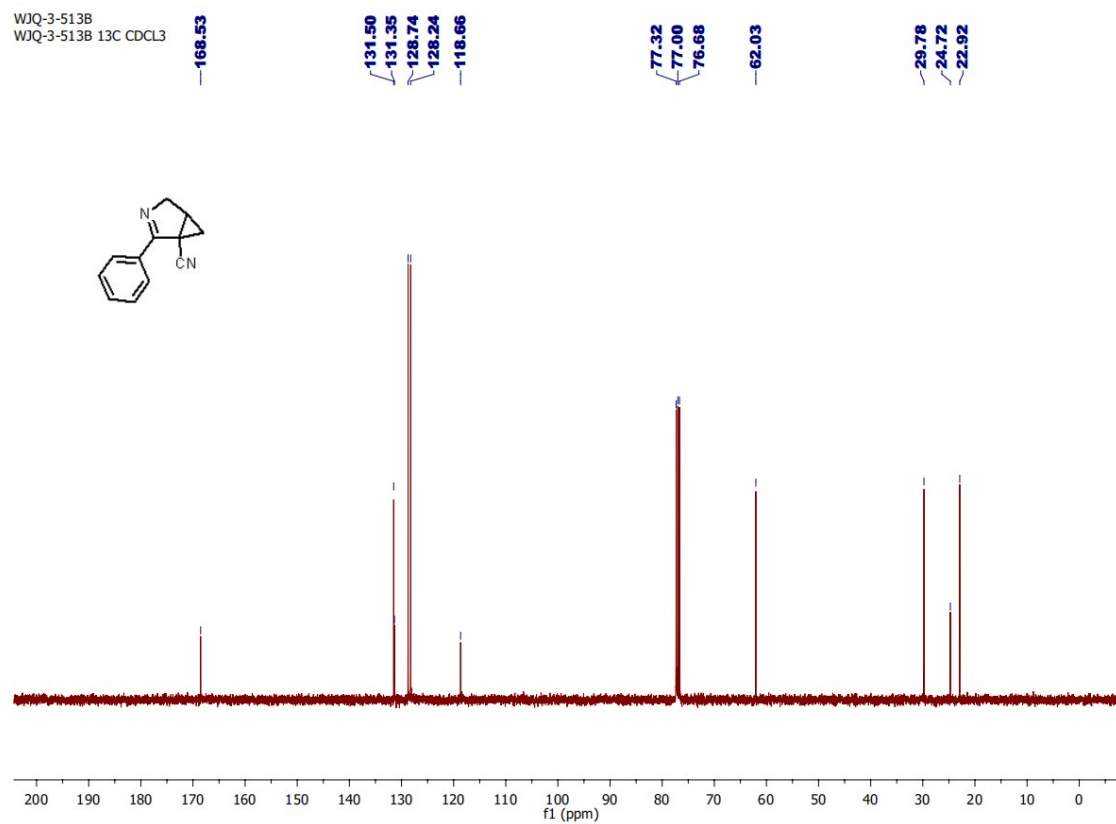

*methyl (E)-3-(allylamino)-2-bromo-3-phenylacrylate (5a)*

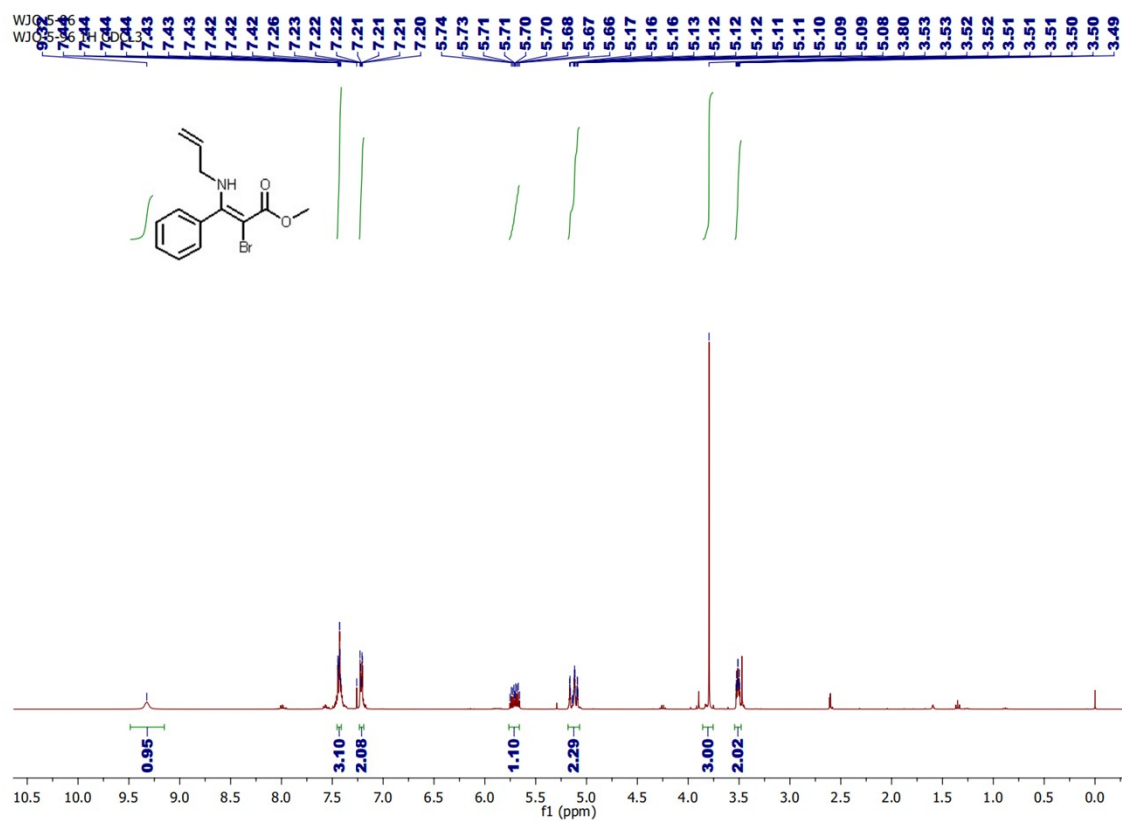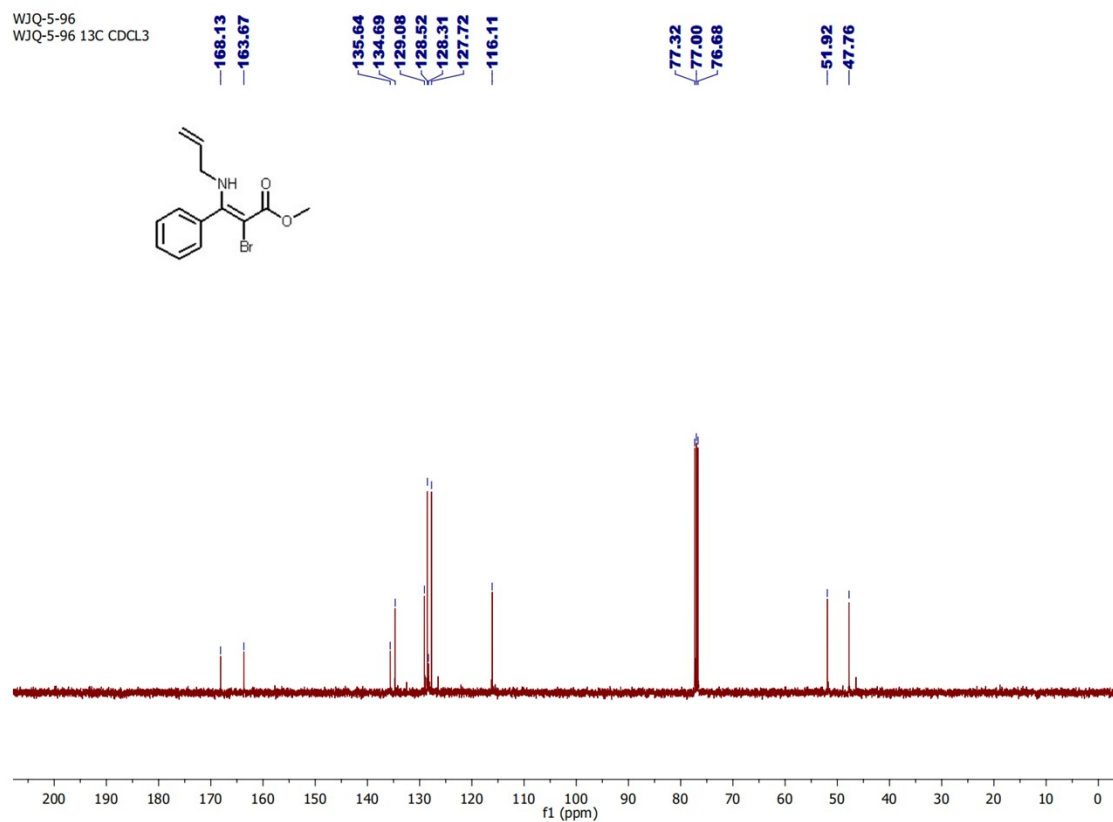

*ethyl 4-bromo-3-(bromomethyl)-5-(4-(trifluoromethyl)phenyl)-3,4-dihydro-2H-pyrrole-4-carboxylate (7f)*

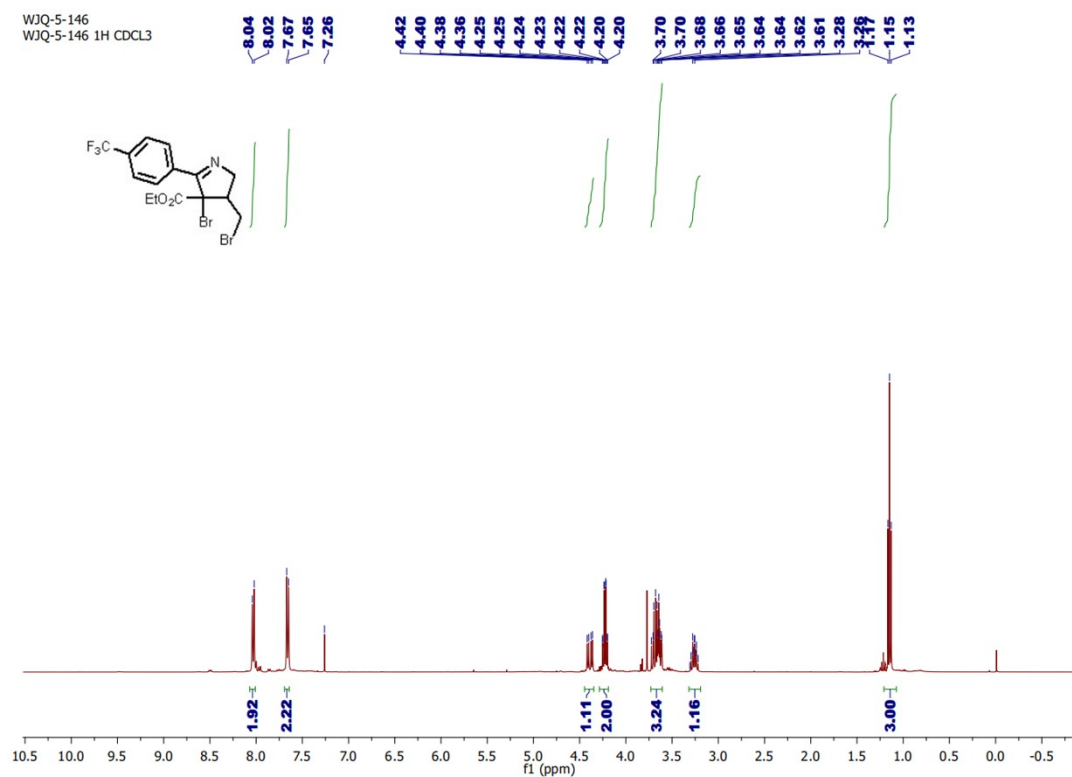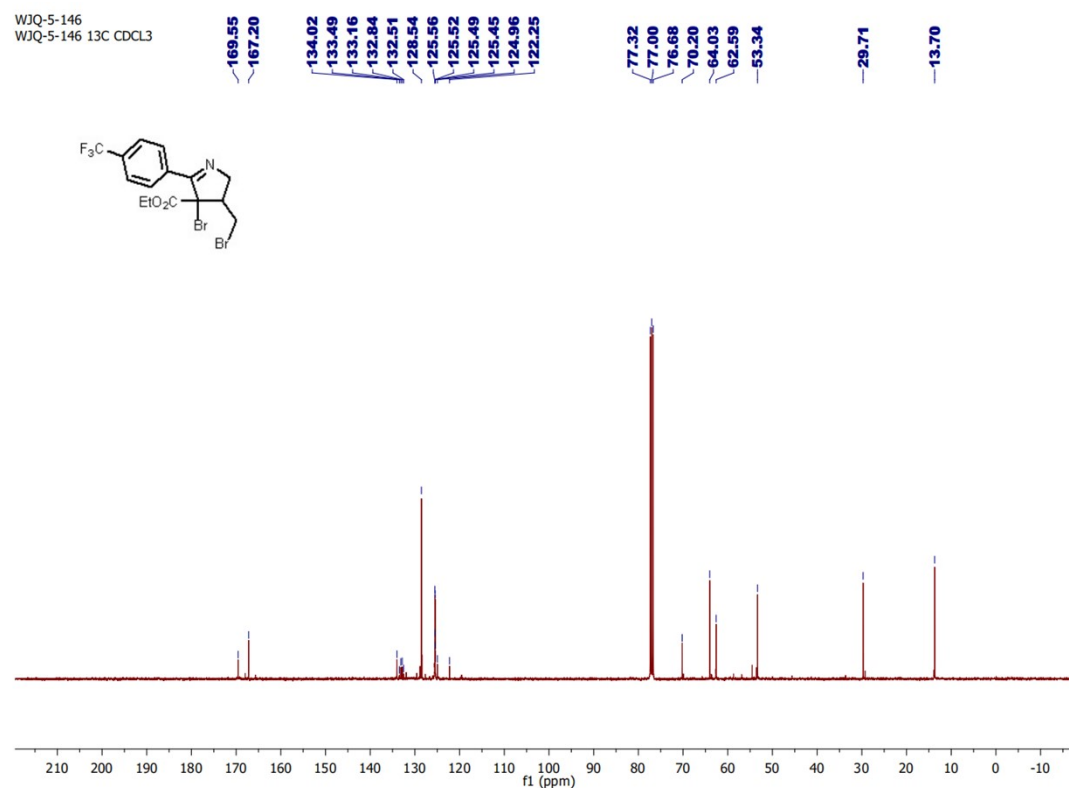

*methyl 4-chloro-3-(chloromethyl)-5-(4-methoxyphenyl)-3,4-dihydro-2H-pyrrole-4-carboxylate*  
**(8c)**

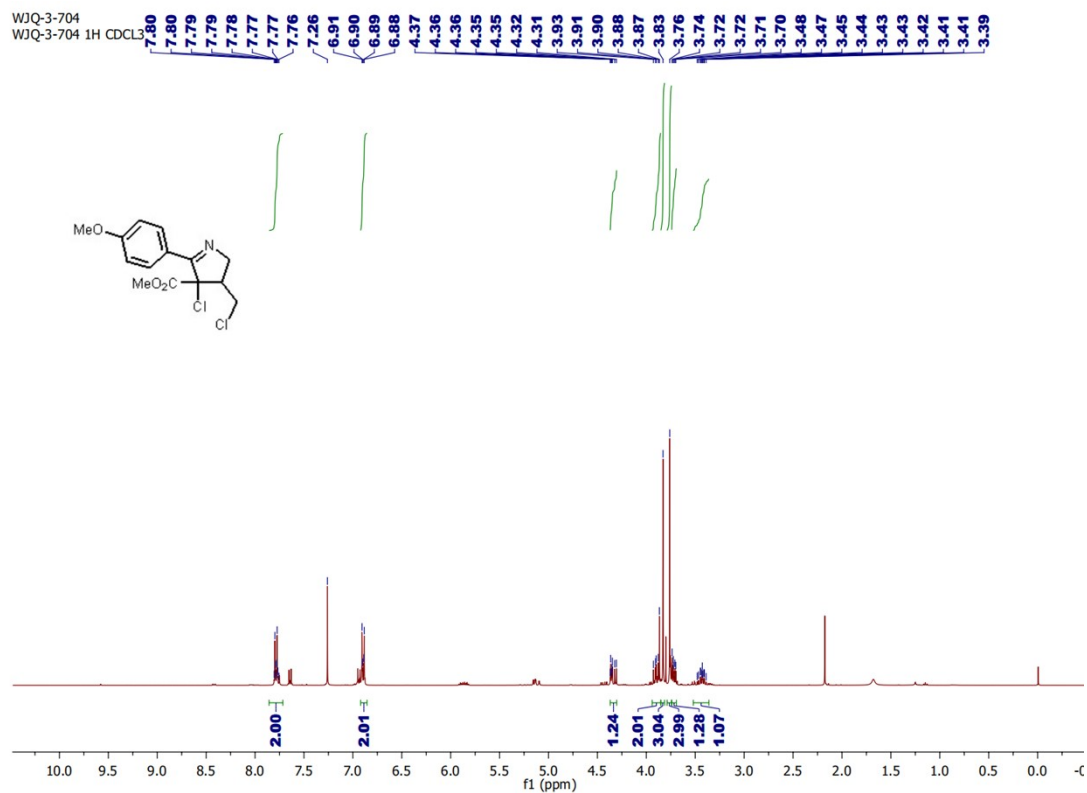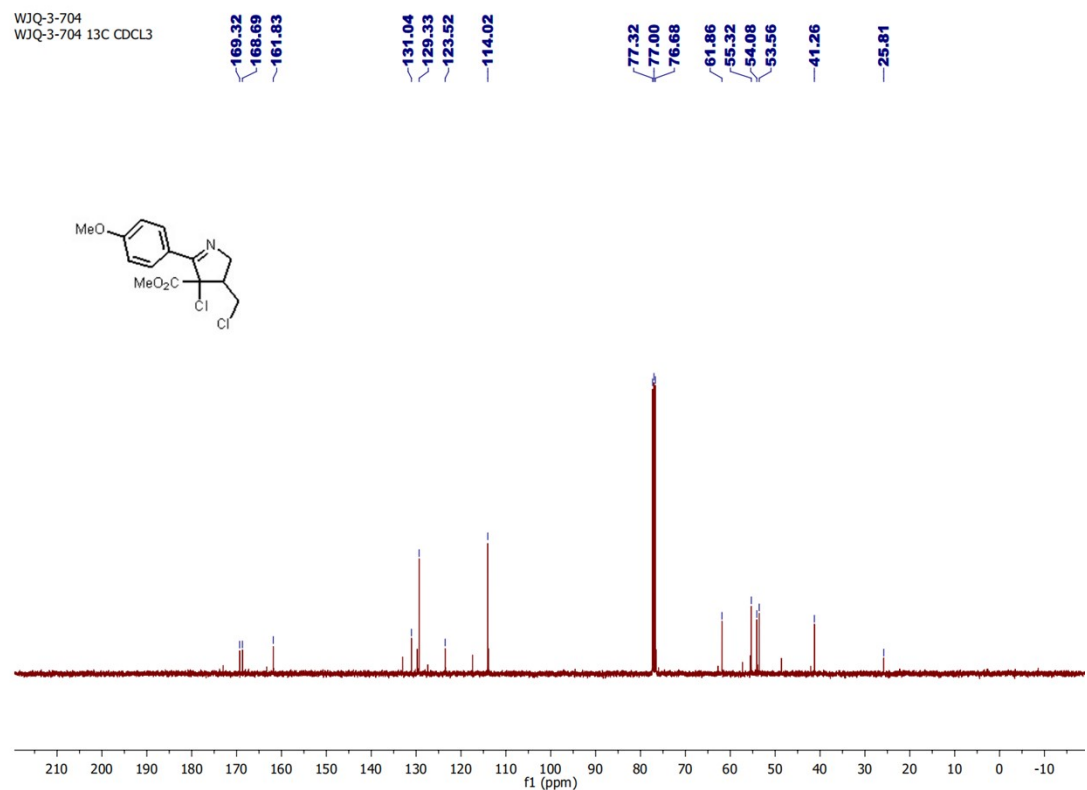

## 2D NMR spectra

COSY spectra of compound **2f** (400 MHz, CDCl<sub>3</sub>)

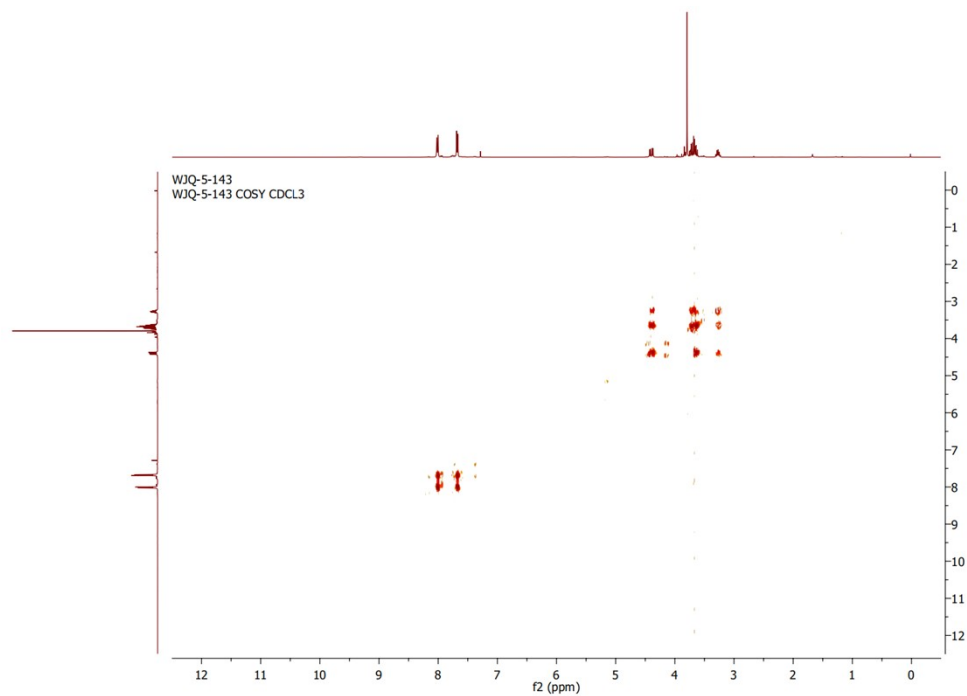

NOESY spectra of compound **2f** (400 MHz, CDCl<sub>3</sub>)

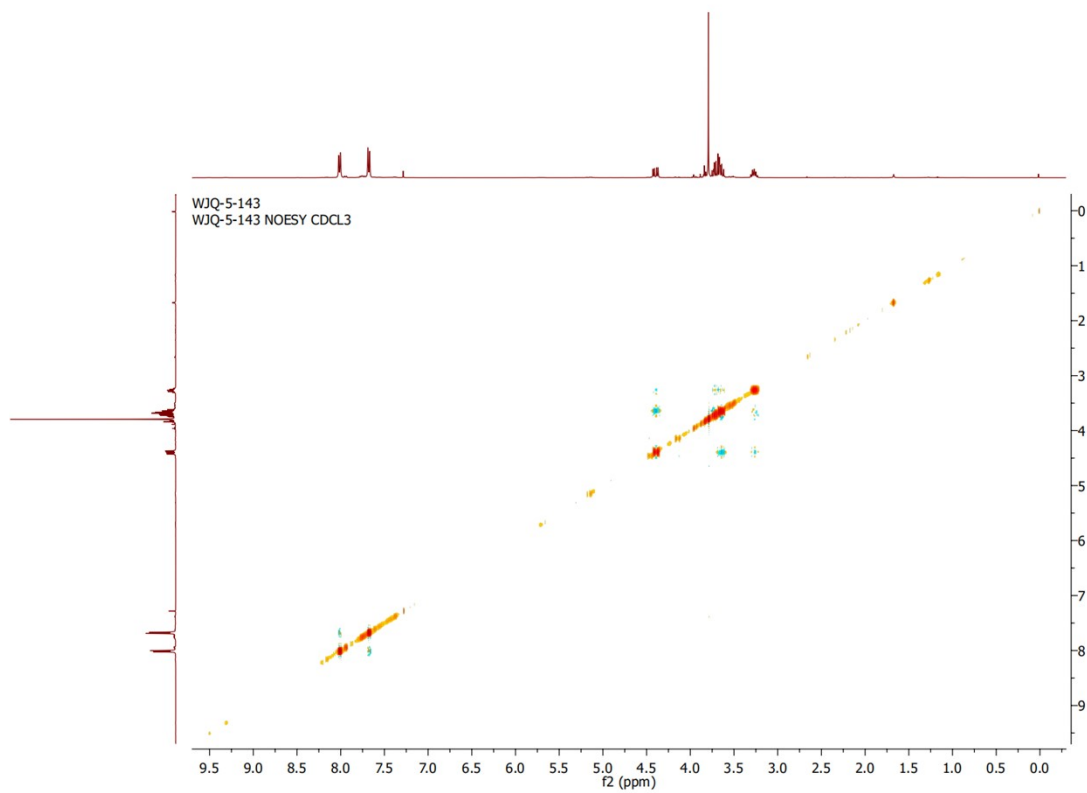

COSY spectra of compound **3a** (400 MHz, CDCl<sub>3</sub>)

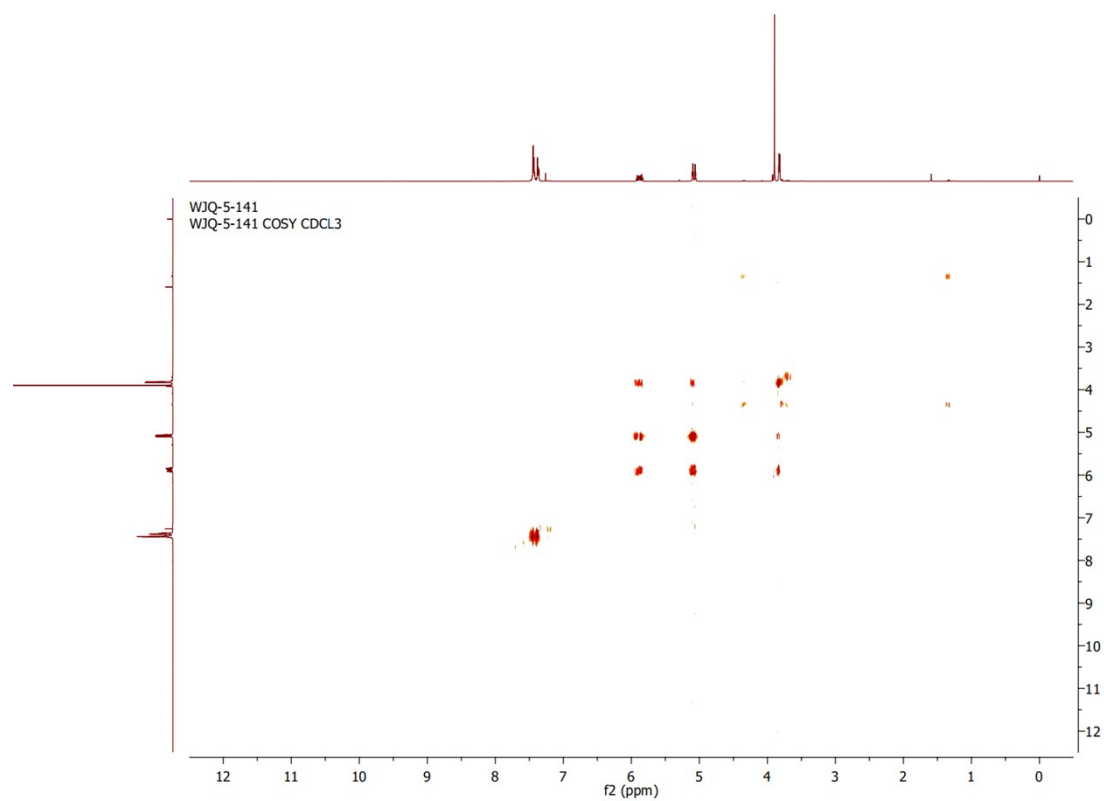

NOESY spectra of compound **3a** (400 MHz, CDCl<sub>3</sub>)

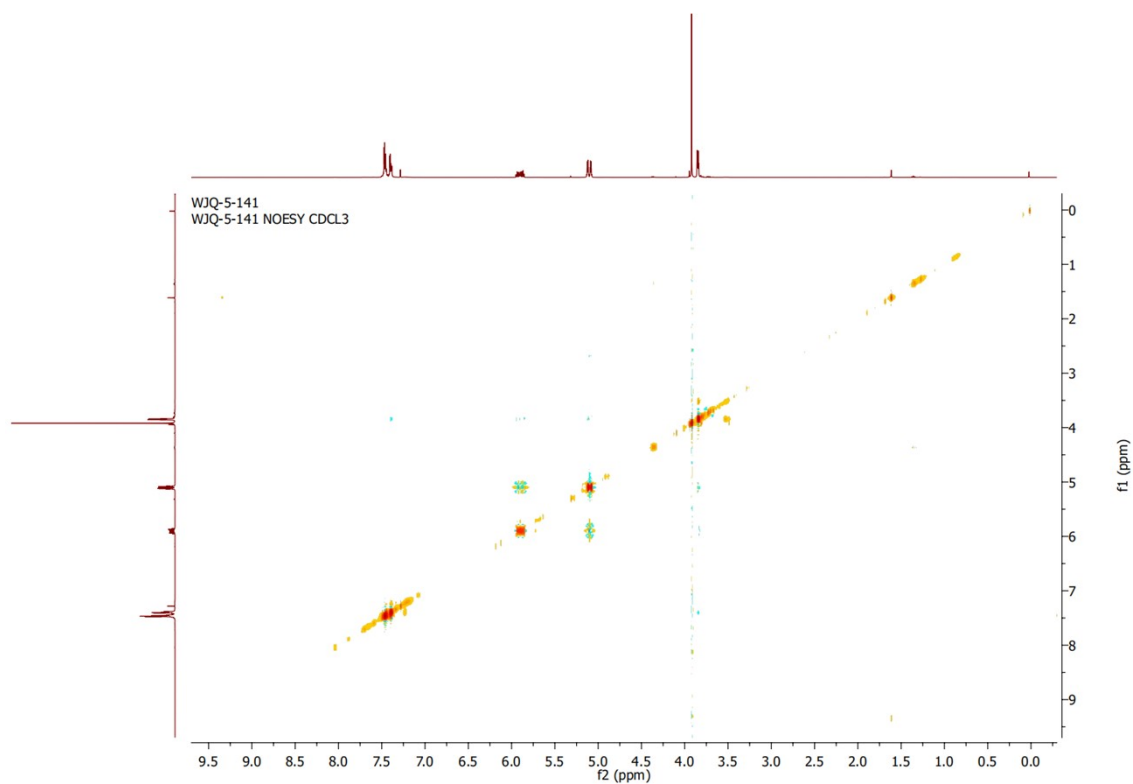

Supplement: d5qo00217f1.pdf [file d5qo00217f1.pdf]
